# Supplementary material
Source: PubMed Central journal article supplement (PMC9822875)
Supplement: NIHMS1850825-supplement-321723_Data_Supplement.pdf [file NIHMS1850825-supplement-321723_Data_Supplement.pdf]

# Supplemental Materials

## **Epsin nanotherapy regulates cholesterol transport to fortify atheroma regression**

Kui Cui<sup>1</sup>†, Xinlei Gao<sup>2</sup>†, Beibei Wang<sup>1</sup>†, Hao Wu<sup>1</sup>, Kulandaisamy Arulsamy<sup>2</sup>, Yunzhou Dong<sup>1</sup>,  
Yuling Xiao<sup>3</sup>, Xingya Jiang<sup>3</sup>, Marina V. Malovichko<sup>4</sup>, Kathryn Li<sup>1</sup>, Qianman Peng<sup>1</sup>, Yaowei Lu<sup>1</sup>,  
Bo Zhu<sup>1</sup>, Rongbin Zheng<sup>2</sup>, Scott Wong<sup>1</sup>, Douglas B. Cowan<sup>1</sup>, MacRae Linton<sup>5</sup>, Sanjay  
Srivastava<sup>4</sup>, Jinjun Shi<sup>3</sup>, Kaifu Chen<sup>2\*</sup>, Hong Chen<sup>1\*</sup>

†These authors contributed equally to this work.

\*Corresponding authors. Email: [hong.chen@childrens.harvard.edu](mailto:hong.chen@childrens.harvard.edu)

[kaifu.chen@childrens.harvard.edu](mailto:kaifu.chen@childrens.harvard.edu)

### **The supplemental materials include:**

Figure S1A. Overview of single cell RNA sequencing (scRNA-seq) and data analysis.

Figure S1B. Overview of animal models.

Figure S2. Cell populations were annotated based on marker gene expression.

Figure S3. Cell proportion changes for each cell type in WT and LysM-DKO.

Figure S4. Metabolite-sensor cell communications related to macrophages.

Figure S5. The expression levels of cholesterol-producing enzymes and the sensor Cd36 tended to decrease while those of cholesterol-consuming enzymes tended to increase in DKO compared to WT mice.

Figure S6. The expression levels of the producing and consuming enzymes for 25-hydroxycholesterol in macrophage subpopulations in WT and DKO aorta.

Figure S7. RNA-seq analysis of WT and DKO macrophages reveals that Epsins regulate lipid cholesterol metabolism and efflux pathways.

Figure S8. Gating strategy and clathrin-mediated CD36 internalization.

Figure S9. The loss of Epsins reduced oxLDL uptake by macrophages.

Figure S10. Transfection of full-length Epsin1 and constructs with the ENTH and UIM domains deleted into WT macrophages did not affect lipid uptake.

Figure S11. Differentially expressed genes between WT and ABCG1 knockout (ABCG1KO) macrophages.

Figure S12. Schematic of the quantification for radiolabeled cholesterol.

- 33 Figure S13. Gene expression levels of indicated genes in WT and DKO macrophage.
- 34 Figure S14. Gating strategy and clathrin mediated-ABCG1 endocytosis.
- 35 Figure S15. The expression of ABCG1 decreased with progression of atherosclerotic lesions in  
36 humans and mice.
- 37 Figure S16. Characterization and silencing efficacy of S2P-conjugated siEpsin1/2 NPs.
- 38 Figure S17. S2PNP-siEpsin1/2 treated macrophages show reduced foam cell formation.
- 39 Figure S18. S2PNP-siEpsin1/2 inhibits lesion formation and macrophage accumulation in early  
40 stage of atherosclerosis.
- 41 Figure S19. Silencing lesional macrophage Epsin1/2 by S2PNP-siEpsin1/2 NP-treatment  
42 stabilized plaques in a progression model of atherosclerosis.
- 43 Figure S20. Delivery of S2PNP-siEpsin1/2 does not change cholesterol and triglyceride levels of  
44 ApoE<sup>-/-</sup> mice fed a WD.
- 45 Figure S21. Silencing macrophage Epsin1/2 by S2PNP-siEpsin1/2 NPs reduces lesion size in a  
46 regression model of atherosclerosis.
- 47 Figure S22. S2PNP-siEpsin1/2 delivery inhibits the progression and regression of atherosclerosis  
48 in female mice.
- 49 Figure S23. Knockdown of Epsin1/2 in THP-1 macrophages show reduced lipid uptake, foam cell  
50 formation and increased cholesterol efflux to HDL.
- 51 Figure S24. Epsins facilitates CD36-mediated lipid uptake and degradation of ABCG1 and LRP1  
52 in THP1 macrophages.
- 53 Figure S25. Summary schematic diagram of the study.
- 54 Table S1. Demographic Information of The Human Samples
- 55 Table S2. Statistical Table
- 56 Major Resource Table
- 57 Data file S1. Differentially expressed genes between cell clusters identified in all the cells in aorta.
- 58 Data file S2. Differentially expressed genes between macrophage subclusters.
- 59 Data file S3. Differentially expressed genes between macrophage subclusters on WD.
- 60 Data file S4. Cholesterol producing and consuming enzymes.
- 61 Data file S5. Differentially expressed genes in DKO compared to wild type.
- 62 Data file S6. Gene differential expression analysis between ABCG1KO and wild type  
63 macrophages.
- 64 Data file S7. Gene expression data for all the expressed genes in DKO compared to wild type.
- 65 Data file S8. Gene expression data for all the expressed genes in ABCG1KO compared to wild  
66 type.
- 67 Data file S9. Gene expression data for all the expressed genes in CD36KO compared to wild type.
- 68 Data file S10. Full GSEA analysis results between DKO and wild type macrophages.
- 69 Data file S11. Full GSEA analysis results between ABCG1KO and wild type macrophages.
- 70 Data file S12. Full GSEA analysis results between CD36KO and wild type macrophages.
- 71 Data file S13. GSEA analysis results for GO Biological Process terms reversely regulated by  
72 ABCG1KO and DKO.
- 73 Data file S14. Gene Ontology enrichment analysis for DEGs shared by DKO and CD36KO.
- 74 Data file S15. Gene Ontology enrichment analysis for DEGs in ABCG1KO compared to wild type.
- 75 Data file S16. Gene Ontology enrichment analysis for pathways reversely regulated by ABCG1KO  
76 and DKO.
- 77 Data file S17. Uncropped Western Blot.
- 78 Data file S18. Primary data of statistical analysis.

## 79 MATERIALS and METHODS

### 80 Animal models

81 In this study, all animal procedures were performed in compliance with institutional guidelines  
 82 and mouse protocols were approved by the Institutional Animal Care and Use Committee (IACUC)  
 83 of Boston Children's Hospital, MA, USA. Both male and female mice were used. C57BL/6 mice  
 84 (stock #00664), ApoE<sup>-/-</sup> mice (stock #002052), LysM-Cre deleter mice (stock #004781), and  
 85 ABCG1<sup>flox</sup> mice (C57BL/6-Abcg1<sup>tm1<sup>Ched</sup>/J</sup>, stock #027954) were all purchased from Jackson  
 86 Research Laboratory. As double knockout mice of Epsins 1 and 2 (Epsin1<sup>-/-</sup>;Epsin2<sup>-/-</sup>) lead to  
 87 embryonic lethality, we generated conditional Epsin1<sup>fl/fl</sup>;Epsin2<sup>-/-</sup> mice previously described<sup>19,20,23</sup>.  
 88 ApoE<sup>-/-</sup> mice, LysM-Cre<sup>+/-</sup> mice and Epsin1<sup>fl/fl</sup>;Epsin2<sup>-/-</sup> mice were backcrossed to C57BL/6  
 89 background. We bred Epsin1<sup>fl/fl</sup>; Epsin2<sup>-/-</sup> mice with LysM-Cre<sup>+/-</sup> mice to generate Epsin1<sup>fl/fl</sup>;  
 90 Epsin2<sup>-/-</sup>; LysM-Cre<sup>+/-</sup> myeloid-specific Epsins deficient (LysM-DKO) mice (Figure S1B-a)<sup>26</sup>. **The**  
 91 **detailed information of all the mice used in this study were described in Figure S1B.** These  
 92 mice only have one copy of LysM Cre as homozygous LysM Cre mice are susceptible to  
 93 atherosclerosis. In addition, we bred Epsin1<sup>fl/fl</sup>; Epsin2<sup>-/-</sup>; LysM-Cre<sup>+/-</sup> mice with ApoE<sup>-/-</sup> (C57BL/6)  
 94 background to generate Epsin1<sup>fl/fl</sup>; Epsin2<sup>-/-</sup>; LysM-Cre<sup>+/-</sup>; ApoE<sup>-/-</sup> mice (LysM-DKO/ApoE<sup>-/-</sup>)  
 95 (Figure S1B-b). Furthermore, we bred Epsin1<sup>fl/fl</sup>; Epsin2<sup>-/-</sup>; LysM-Cre<sup>+/-</sup>; ApoE<sup>-/-</sup> (LysM-  
 96 DKO/ApoE<sup>-/-</sup>) mice with ABCG1<sup>flox/+</sup> to generate Epsin1<sup>fl/fl</sup>; Epsin2<sup>-/-</sup>; LysM-Cre<sup>+/-</sup>; ABCG1<sup>flox/+</sup>;  
 97 ApoE<sup>-/-</sup> mice (LysM-DKO/ABCG1<sup>flox/+</sup>/ApoE<sup>-/-</sup>) (Figure S1B-c). We also bred ABCG1<sup>flox/+</sup> with  
 98 ABCG1<sup>flox/+</sup> to generate ABCG1<sup>flox/flox</sup> mice, then further bred ABCG1<sup>flox/flox</sup> mice with LysM-Cre<sup>+/-</sup>  
 99 mice to generate ABCG1<sup>flox/flox</sup>; LysM-Cre<sup>+/-</sup> (ABCG1 KO) (Figure S1B-d).

100 The control mice for Epsin1<sup>fl/fl</sup>; Epsin2<sup>-/-</sup>; LysM-Cre<sup>+/-</sup> (LysM-DKO) mice were Epsin1<sup>+/+</sup>;  
 101 Epsin2<sup>+/+</sup> LysM-Cre<sup>+/-</sup> mice (WT) (Figure S1B-a). The control mice for Epsin1<sup>fl/fl</sup>; Epsin2<sup>-/-</sup>; LysM-

102 Cre<sup>+/-</sup>; ApoE<sup>-/-</sup> (LysM-DKO/ApoE<sup>-/-</sup>) were Epsin1<sup>+/+</sup>; Epsin2<sup>+/+</sup>; LysM-Cre<sup>+/-</sup>; ApoE<sup>-/-</sup> (WT/ApoE<sup>-/-</sup>)  
103 (Figure S1B-b). The control mice for Epsin1<sup>fl/fl</sup>; Epsin2<sup>-/-</sup>; LysM-Cre<sup>+/-</sup>; ABCG1<sup>fllox/+</sup>; ApoE<sup>-/-</sup> mice  
104 (LysM-DKO/ABCG1<sup>fllox/+</sup>/ApoE<sup>-/-</sup>) were Epsin1<sup>+/+</sup>; Epsin2<sup>+/+</sup>; LysM-Cre<sup>+/-</sup>; ApoE<sup>-/-</sup> (WT/ApoE<sup>-/-</sup>)  
105 (Figure S1B-c). The control mice for ABCG1<sup>fllox/fllox</sup>; LysM-Cre<sup>+/-</sup> (ABCG1 KO) were ABCG1<sup>+/+</sup>;  
106 LysM-Cre<sup>+/-</sup> (Figure S1B-d).

107 We used peritoneal macrophages from WT and LysM-DKO mice on either normal background  
108 or ApoE<sup>-/-</sup> background. We have not seen significant differences in the results with these  
109 backgrounds (detailed information of the mice that we used were interpreted in each figure  
110 legend). Therefore, we referred to the macrophages from WT or ApoE<sup>-/-</sup>/WT as WT macrophages  
111 and macrophage from LysM-DKO or LysM-DKO/ApoE<sup>-/-</sup> as DKO macrophages.

112 We used these mice (male and female) and primary macrophages (peritoneal and bone  
113 marrow derived) isolated from them for this study.

114 To induce atherosclerosis, mice were fed Western diet (WD, Protein 17% kcal, Fat 40% kcal,  
115 Carbohydrate 43% kcal; D12079B, Research Diets, New Brunswick, USA) starting at the age of  
116 6-8 weeks for 8-20 weeks. Mice were sacrificed at different time points based on the experimental  
117 design and peritoneal macrophages, blood, heart, aorta and bone marrow monocytes were  
118 harvested. For control mice, in addition to ApoE<sup>-/-</sup>;Epsin1<sup>+/+</sup>;Epsin2<sup>+/+</sup> mice, we also used ApoE<sup>-/-</sup>;  
119 Epsin1<sup>+/+</sup>;Epsin2<sup>+/+</sup> mice with a single copy of LysM-cre, and ApoE<sup>-/-</sup>;Epsin1<sup>fl/fl</sup>;Epsin2<sup>-/-</sup>  
120 littermates lacking the single copy of LysM-cre. To simplify the terminology, we refer to these  
121 control mice as ApoE<sup>-/-</sup>, as results were not different in any of the analyses we performed. For the  
122 study of atheroma resolution, WT mice (both male and female) at the age of 8 weeks were  
123 intravenously injected with 2x10<sup>11</sup> genomes of PCSK9 adeno-associated virus (rAAV8-D377Y-  
124 mPCSK9 purchased from Boston Children's Hospital Viral Core Facility) followed by 17 weeks

125 of WD feeding. For each experimental model and time point, 6-10 mice were analyzed and both  
126 male and female mice were used in separate groups. In the current study, we did not exclude any  
127 mice when analyzing.

### 128 **Aortic single-cell preparation and single-cell RNA (scRNA) sequencing**

129 WT and DKO mice were euthanized by CO<sub>2</sub> inhalation. The aortas were isolated after  
130 perfusion with 30 mL of PBS through left ventricular and quickly transferred to cold DMEM  
131 medium. Aortas from the two groups were cut into about small pieces and digested with an enzyme  
132 solution (5mg/mL collagenase type I, 5mg/mL collagenase type IV, and 5mg/mL liberase) for  
133 90min at 37 °C on a shaker. The digested cell suspension was filtered through a 40 µm strainer  
134 and washed twice with PBS. The cells were resuspended and ready for sequencing in PBS with  
135 0.04% bovine serum albumin, and their viability was over 90%.

136 Single-cell RNA-Seq library construction was performed using the protocol provided by 10X  
137 Genomics. In brief, the single-cell suspensions from both groups, reagents, gel beads and  
138 partitioning oil were loaded to 10X Chromium Chip G to generate single-cell Gel Beads-in-  
139 emulsion (GEMs, Single cell 3' Reagent Kits v3.1, 10X Genomics). scRNA was barcoded through  
140 reverse transcription in individual GEMs followed by a post GEM-RT cleanup and cDNA  
141 amplification. Then, a 3'-gene expression library construction was performed. Finally, the library  
142 was sent for sequencing.

### 143 **ScRNA-seq data analysis and metabolite-sensor communication inference**

144 The raw scRNA-seq data were processed using Cell Ranger (version 6.1.2) (10x Genomics).  
145 The reads were mapped to the prebuilt mouse mm10 genome. The resulted gene expression matrix  
146 in individual single cells was processed by the R package Seurat (version 4.1.0)<sup>80</sup>. Low-quality  
147 cells with number of expressed genes less than 200 or larger than 5000 or with percentage of

148 mitochondria reads greater than 10% were dropped out. Rarely expressed genes which were  
149 detected in less than 3 cells were removed. Mitochondria genes and ribosomal protein coding genes  
150 were removed from the expression matrix before normalization. The high-quality data after these  
151 filtering steps was then used at additional processing steps including log normalization, data  
152 scaling, principal component analysis (PCA), cell clustering, and UMAP visualization. The UMAP  
153 visualization of cell clusters was performed by the DimPlot function. Differentially expressed  
154 genes among cell clusters were identified by FindAllMarkers function using the default Wilcoxon  
155 test method, with minimal percentage of expressed cells as 25% and minimal log2 fold change as  
156 0.25. Next, marker genes in each cell clusters were used to annotate cell types based on known  
157 marker genes in PanglaoDB database <sup>50</sup> and literatures. The marker gene expressions were  
158 visualized by DotPlot and VlnPlot function. Trajectory analysis was conducted by Monocle3 <sup>81,82</sup>.  
159 The metabolite-sensor cell-cell communication was analyzed by MEBOCOST <sup>53</sup>. The data was  
160 analyzed following the tutorial on the MEBOCOST website  
161 (<https://github.com/zhengrongbin/MEBOCOST>). Note that a metabolomics analysis was not  
162 conducted in this study. Instead, scRNA-seq expression data was used to estimate metabolite  
163 abundance and calculate communication score for each condition. Next, results of two conditions  
164 were combined to compare the communications. The differences in communication scores  
165 between two conditions were calculated. The prediction of sender-metabolite-sensor-receiver  
166 communication events were visualized by barplot, flow plot and circle plot. The metabolite  
167 abundance and sensor expression levels were exhibited by violin plot. Index of dispersion (IOD)  
168 was calculated using communication scores across conditions as described in the MEBOCOST  
169 paper<sup>53</sup>. The top 100 most variable communications were selected for further investigation. All the  
170 data for scRNA-seq are available in Data files (S1-S4).

## 171 **Human samples**

172 Human healthy control and diseased aortic arch samples from atherosclerosis patients were  
173 purchased from Maine Medical Center Biobank. The medical information of the atherosclerotic  
174 patient and healthy people samples is in Table S1. The paraffin sections were de-paraffinized and  
175 performed antigen retrieval to unmask the antigenic epitope with 10mM Sodium Citrate, pH 6.0,  
176 with 0.5% Tween 20 at 90°C for 10 minutes. Immunofluorescence staining of the slides was  
177 performed with the standard protocol described below.

## 178 **Synthesis of DSPE-PEG-S2P, preparation and characterization of S2PNP-siRNA**

179 To construct the lesional macrophage-targeted siRNA NPs, S2P peptide-conjugated DSPE-  
180 PEG (DSPE-PEG-S2P) was first synthesized via a thiol-maleimide Michael addition click reaction  
181 between S2P peptide (CRTLTVRKC, GLS Biochem Systems Inc.) and DSPE-PEG-Mal [PEG  
182 molecular weight, 3.4 kDa; Nanocs Inc.], as reported previously<sup>59</sup>. Then, a robust self-assembly  
183 method was used to prepare the targeted polymer-lipid hybrid NPs for siRNA delivery<sup>59,83</sup>. In brief,  
184 G0-C14 and PLGA were dissolved separately in anhydrous dimethylformamide (DMF) to form a  
185 homogeneous solution at the concentration of 2.5 mg/mL and 5 mg/ml, respectively. DSPE-PEG-  
186 OCH<sub>3</sub> (DSPE-mPEG) and DSPE-PEG-S2P were dissolved in HyPure water (GE Healthcare Life  
187 Sciences, catalog no. SH30538) at the concentration of 0.1 mg/mL. 1 nmol Epsin1 siRNA and 1  
188 nmol Epsin2 siRNA were gently mixed with 100  $\mu$ L of the G0-C14 solution. The mixture of  
189 siRNA and G0-C14 was incubated at room temperature for 15 min to ensure the full electrostatic  
190 complexation. Next, 500  $\mu$ L of PLGA polymers were added and mixed gently. The resultant  
191 solution was subsequently added dropwise into 10 mL of HyPure water containing 1 mg lipid-  
192 PEGs (i.e., 50% DSPE-PEG-S2P and 50% DSPE-mPEG hybrids for the S2P-targeted siRNA NPs,  
193 or 100% DSPE-mPEG for the non-targeted siRNA NPs) under magnetic stirring (1,000 rpm) for

194 30 min. The siRNA NPs were purified by an ultrafiltration device (EMD Millipore, MWCO 100  
195 kDa) to remove the organic solvent and free excess compounds via centrifugation at 4 °C. After  
196 washing 3 times with HyPure water, the siRNA NPs were collected and finally resuspended in pH  
197 7.4 PBS buffer. The NPs were used freshly or stored at -80 °C for further use. The physicochemical  
198 properties (particle size and surface charge) of S2PNP-siEpsin1/2 were characterized by dynamic  
199 light scattering (DLS, Brookhaven Instruments Corporation). The S2PNP-siEpsin1/2 was ~89 nm  
200 in size as measured by DLS, and their surface charge was determined to be ~ -5.3 mV.

### 201 **Isolation of primary mouse macrophage and macrophage culture**

202 The isolation of peritoneal macrophages was performed as described previously<sup>84</sup>. Briefly,  
203 mice were intraperitoneally injected with 1mL of 4% thioglycolate (TG), and 3 days post-injection,  
204 mice were sacrificed, and peritoneal cells were harvested with 7mL of sterile PBS by lavage of  
205 peritoneal cavity. Cells were spun down (1000xg, 5 minutes), washed with PBS, resuspended, and  
206 plated in RPMI (containing 10% FBS and 1% Pen-Strep) at 37 °C in humidified air containing 5%  
207 CO<sub>2</sub> atmosphere. After 3 hours, non-macrophages were washed with PBS. For bone marrow-  
208 derived macrophages, mice were sacrificed, and both femurs and tibias were dissected and flushed  
209 with sterile 1X PBS, followed by passing through a 70µM cell strainer. Cells were spun down  
210 (1000xg, 5 minutes), washed with PBS, and seeded in RPMI (containing 10% FBS and 1% Pen-  
211 Strep) with macrophage colony stimulating factor (M-CSF, 10ng/mL) to differentiate into  
212 macrophages for 5 days. After which, the macrophages were harvested and used in experiments.  
213 Both bone marrow-derived and isolated peritoneal primary macrophages were used to confirm  
214 knock out of Epsin1 and Epsin2. Isolated peritoneal macrophages were mainly used for western  
215 blots, flow cytometry and immunoprecipitations due to higher yields.

### 216 **Human THP1 macrophage culture and transfection of Epsin1/2 siRNA mix**



217 THP1 monocytes (human monocytic leukemia cell line) from ATCC (TIB-202) was cultured  
218 in RPMI 1640 medium containing 10% fetal bovine serum and 1% penicillin/streptomycin at 37°C  
219 in 5% CO<sub>2</sub> humidified incubator. THP1 monocytes (1X10<sup>6</sup> cells/mL) were differentiated into  
220 THP1 macrophages with 10 ng/mL phorbol 12-myristate 13-acetate (PMA) for 48 hours. Then,  
221 the transfection of control siRNA (4 µg) and human epsin 1 and 2 siRNAs mix (2 µg/each siRNA)  
222 to the differentiated THP1 macrophages were performed using a Nucleofector 2b device for  
223 electroporation of the cells<sup>85</sup>. After transfection, the transfected THP1 macrophages were  
224 incubated with different kinds of compounds for functional studies.

### 225 **RNA isolation, quantitative real-time PCR and RNA sequencing**

226 Total RNA was extracted from primary macrophages with Qiagen RNeasy Mini Kit based on  
227 manufacturer's instruction including the optional step to eliminate genomic DNA. The extracted  
228 RNA was either used for qRT-PCR or RNA sequencing according to the experimental designs.

229 For qRT-PCR, mRNA was reverse transcribed to cDNA with the iScript cDNA Synthesis Kit  
230 (Bio-Rad Laboratories, Inc., Hercules, CA, United States). 2 µL of the product was subjected to  
231 qRT-PCR in StepOnePlus Real-Time PCR System (Applied Biosystems) using SYBR Green PCR  
232 Master Mix reagent as the detector. PCR amplification was performed in triplicate on 96-well  
233 optical reaction plates and replicated in at least three independent experiments. The  $\Delta\Delta C_t$  method  
234 was used to analyze qPCR data. The Ct of  $\beta$ -actin cDNA was used to normalize all samples.  
235 Primers are listed in Major Resource Table. For RNA sequencing, extracted RNA from primary  
236 macrophages with Qiagen RNeasy Mini Kit based on manufacturer's instruction were sent to BGI  
237 Genomics Company (San Jose, USA) for RNA sequencing.

### 238 **RNA sequencing data processing and differential expression analysis**

239 The raw reads of RNA sequencing data were mapped to the mouse genome (version mm10)  
240 using STAR (version 2.7.9a)<sup>86</sup> or TopHat (version v2.1.1)<sup>87</sup>. The read count was calculated for  
241 each gene by htseq-count (version 0.11.2)<sup>88</sup> and further normalized to TPM (transcripts per million)  
242 and FPKM (fragments per kilobase of transcript per million fragments mapped). For differential  
243 expression analysis of Epsin deficient and wild type macrophage dataset, the read count matrix  
244 produced by htseq-count was imported into the R package DESeq2 (version 1.30.1)<sup>89</sup>. For the  
245 ABCG1 knock out dataset, we first performed a batch effect removal on the log10 transformed  
246 TPM expression matrix using ComBat in the R package sva (version 3.38.0)<sup>90</sup>. Then, the R  
247 package limma was used to do differential expression analysis for the batch effect-removed  
248 expression matrix. Genes with fold change larger than 1.2-fold and p-value less than 0.05 were  
249 identified as differentially expressed genes (DEGs). Principal component analysis (PCA) was  
250 conducted by the plotPCA function of DESeq2. Heatmap of gene expression values was generated  
251 using the R package heatmap (version 1.0.12). Gene Ontology (GO) functional enrichment  
252 analysis was performed by the R package clusterProfiler (version 3.18.1)<sup>91</sup>.

253 For the comparison of DEGs between DKO and CD36 knockout macrophages in mice, we  
254 utilized the published bulk RNA-seq data from Chen et. al.<sup>56</sup>, with the accession number  
255 GSE139439, downloaded from NCBI GEO database<sup>92</sup>. The overlapping DEGs co-regulated in  
256 DKO and CD36 knockout macrophages were analyzed by the R package VennDiagram (version  
257 1.6.20)<sup>93</sup>. The statistical significance of overlapping genes was calculated by Fisher exact test. All  
258 the data for bulk RNA-seq are available in Data files (S5-S16).

### 259 **Cell culture and plasmids transfection**

260 The HEK 293T cell line (ATCC no. CRL-11268) was used for plasmid transfection to map the  
261 binding sites of Epsin to CD36 or ABCG1. Flag-tagged Epsin1<sup>WT</sup>, Epsin1<sup>ΔUIM</sup>, Epsin1<sup>ΔENTH</sup>

262 truncation constructs, and pcDNA vector were prepared previously in our lab<sup>25</sup>. CD36 (lot:52025)  
263 and ABCG1 (lot:53952) plasmids were purchased from AddGene. HEK 293T cells were cultured  
264 in DMEM (10% FBS and 1% Pen-Strep) at 37°C in humidified air containing 5% CO<sub>2</sub> atmosphere  
265 and transfected using Lipofectamine 2000 as instructed by the manufacturer. Transfection of Epsin  
266 domains to macrophage: Isolated WT and DKO peritoneal macrophages were cultured in RPMI  
267 media (containing 10% lipid-depleted serum and 1% Pen-Strep). Epsin1<sup>WT</sup>, Epsin1<sup>ΔUIM</sup>,  
268 Epsin1<sup>ΔENTH</sup> truncation constructs, and pcDNA vector were transfected to macrophages using  
269 lipofectamine LTX transfection reagent or using Nucleofector II apparatus (Amaxa, Germany)  
270 with mouse macrophage nucleofector kit (Lot: VPA-1009, Lonza) as instructed by the manufacturer.

#### 271 **Immunoprecipitation (IP) and western blotting (WB)**

272 For total protein levels, primary macrophages were washed with ice cold PBS, lysed in RIPA  
273 buffer (50 mM Tris HCl, 150 mM NaCl, 1.0% NP-40, 0.5% Sodium Deoxycholate, 1.0 mM EDTA,  
274 0.1% SDS and 0.01% sodium azide at a pH of 7.4.), added 4X Laemmli buffer (1:3 dilution in  
275 lysis buffer) was added and WB was performed for the proteins indicated in this study. For IP,  
276 cells were washed with ice cold PBS, lysed with lysis buffer (1% Triton X-100, 5mM Na<sub>3</sub>VO<sub>4</sub>,  
277 10mM N-ethylmaleimide, and protease inhibitor cocktail), spun down (12000xg, 5 min at 4°C) to  
278 remove the debris. Cell lysates were pre-cleared with appropriate species of IgG and protein A/G  
279 Sepharose beads for 1h at 4°C with rotation followed by incubation with A/G Sepharose beads and  
280 indicated antibodies for 12 hours at 4°C with rotation. For negative controls, equal concentrations  
281 of mouse IgG were added instead of specific antibodies. Precipitated proteins were washed with  
282 ice cold lysis buffer for 3 time and eluted from protein A/G beads using 2X Laemmli buffer (1:1  
283 in lysis buffer) followed by WB as described previously<sup>26</sup>. WB were repeated for at least 3 times  
284 with different mice and bands were quantified using NIH ImageJ software. The protein expression

285 levels were normalized to GAPDH levels. For IPs in macrophages involving oxLDL treatment,  
286 cells were pre-treated with 1  $\mu$ M MG132 in serum-free media for 4 hours, followed by the  
287 treatment with or without oxLDL (100 $\mu$ g/ml) for 30 minutes at 37°C and processed for  
288 immunoprecipitation. For the transfection of Epsin1 constructs and CD36 or ABCG1 constructs,  
289 transfected HEK 293T cells were cultured in lipid-depleted DMEM media for 24 hours followed  
290 by stimulation with 100 $\mu$ g/mL oxLDL for 30 minutes at 37°C and performed for  
291 immunoprecipitation.

## 292 **Atherosclerosis analysis**

293 Mice were anesthetized with isoflurane. Blood was collected from the right atrium followed  
294 by left ventricle perfusion with cold PBS. Whole aortas, brachiocephalic artery (BCA) and hearts  
295 of the mice were isolated. Whole aortas were dissected symmetrically, pinned to parafilm and  
296 fixed in 4% PFA to allow the *en face* analysis. Heart and BCA were embedded in OCT mounting  
297 medium and immediately frozen. The aortic sinus and BCA in the heart were sectioned at 10  
298 microns (at least 9 sections of each sample were collected). The internal elastic lamina and luminal  
299 boundary of the lesion was manually traced and the lesion sizes of the *en face* aortas and aortic  
300 roots were quantified by NIH ImageJ software. The methods for Oil Red O (ORO) staining,  
301 immunofluorescent (IF) staining, Hematoxylin and Eosin (H&E) staining, and Van Gieson's  
302 staining are described in supplemental materials <sup>26</sup>.

303 ORO staining and IF staining of primary macrophages or cryosections were performed as  
304 described below. Oil Red O imaging was taken by a Zeiss Axio Scope.A1, AxioCam ICc5, and  
305 analyzed by ZEN-Lite 2012 software. Imaging of *en face* aortas was performed using a Nikon  
306 SMZ1500 stereomicroscope, SPOT Insight 2Mp Firewire digital camera, and SPOT Software 5.1.  
307 Imaging of IF staining was taken by Zeiss confocal microscope and quantification areas were

308 performed by manually tracing the aortas, BCA, and aortic root lesion areas with NIH ImageJ  
309 software. Statistical analysis of samples including Oil Red O, Van Gieson's, H&E, and IF staining  
310 were performed by blinding in which each animal was assigned a number and data was collected  
311 based on the assigned number with genotype and experimental condition unknown to the data  
312 collector.

### 313 **Oil Red O staining**

314 For cryostat sections: cryostat sections 10 microns were fixed in 4% paraformaldehyde. Slides  
315 were washed with PBS (3 times, 5 min each time), and rinsed with 100% propylene glycol  
316 followed by staining with freshly prepared 0.5% Oil Red O solution for 10 minutes at 60°C. Slides  
317 were then put in 85% propylene glycol for 2 min, followed by 3 washes in water. Slides were next  
318 incubated with hematoxylin for 1-2 min, rinsed 3 times in water, and mounted with aqueous  
319 mounting medium. For foam cells: coverslips were washed with PBS, fixed in 4%  
320 paraformaldehyde for 10 min and stained with freshly prepared 0.5% Oil Red O solution for 10  
321 min at 65°C. Slides were then washed in PBS (3 times, 5min each time), incubated with  
322 hematoxylin for 1min, washed with PBS 3 times, and mounted on coverslips with aqueous  
323 mounting medium. Imaging was processed with a Zeiss LSM880 confocal microscope and  
324 analyzed with ZEN-Lite 2012 software and NIH ImageJ software. Quantification of lesion was  
325 performed as described above. Quantification of foam cells was performed as described below.

### 326 **Hematoxylin and Eosin staining**

327 Frozen aortic root and BCA sections: slides were fixed in 10% buffered formalin for 15 min  
328 and washed in water. Next, slides were stained with 0.1% hematoxylin for 3min followed by  
329 ddH<sub>2</sub>O washes, 95% ethyl alcohol and water. Slides were then dipped in 0.5% Eosin for 3 min,

330 quickly rinsed with ddH<sub>2</sub>O, dipped in 95% and 100% ethanol, incubated in 50:50 Xylenes:100%  
331 ethanol and incubated in 100% Xylenes. Slides were mounted using Permunt with coverslips.

### 332 **Van Gieson's staining**

333 Sections were fixed in 10% buffered formalin for 15 min and washed in water. Slides were  
334 stained with hematoxylin for 10 min, washed in ddH<sub>2</sub>O, stained 1-3 min in Van Gieson's solution,  
335 dehydrated in 95% alcohol and 100% alcohol two times. Then, slides were cleared in xylene for  
336 two times and mounted with Permunt. Staining results were presented as: Elastic fibers and  
337 nuclei–Black, Collagen fibers–Red and Other tissue elements–Yellow. Lesion area was traced  
338 using NIH ImageJ software. The percentage of necrotic area was determined by necrotic areas  
339 within the lesion. Collagen content was determined by the percentage of lesion areas.

### 340 **Immunofluorescence staining**

341 Human samples: human healthy and atherosclerotic aorta paraffin sections were deparaffinized  
342 in xylene for 15min, immersed in graded ethanol (100%, 100%, 95%, 90%, 80%, and 70%, each  
343 for 3 min), washed with running tap water and processed antigen retrieval with 10mM Sodium  
344 Citrate, pH 6.0, with 0.05% Tween 20 at 90°C for 10 min. Samples were blocked in PBS with 3%  
345 donkey serum, 3% BSA, and 0.3% Triton X-100 and incubated with primary antibodies ABCG1  
346 or CD68 (1:70 dilution) at 4°C overnight. The sections were washed three times and respective  
347 secondary antibodies conjugated to fluorescent labels (Alexa Flour 594, 488, or 647; 1:200 to  
348 1:500) were added for 2 h at room temperature. The sections were mounted with mounting medium  
349 containing DAPI (1:100). Isotype controls for the immunofluorescence experiments was used to  
350 validate antibody specificity (isotype antibodies) and distinguish genuine target staining from  
351 background (secondary antibody only controls).

352 Mouse aortic root and BCA cryosections: Sections were fixed by 4% paraformaldehyde for 30  
353 min at room temperature and blocked in PBS solution containing 3% donkey and/or goat serum,  
354 3% BSA, and 0.3% Triton X-100 for 1hour. Samples were then incubated with primary antibody  
355 at 4°C overnight, followed by incubation with the respective secondary antibodies conjugated to  
356 fluorescent labels (Alexa Flour 594, 488, or 647; 1:200 to 1:500) for 2 h at room temperature. The  
357 sections were mounted with mounting medium containing DAPI (1:100).

358 Staining of peritoneal macrophages: macrophages plated on the 18-mm coverslips were  
359 washed with PBS, fixed by 4% paraformaldehyde for 15 min at room temperature and blocked in  
360 PBS solution containing 3% donkey and/or goat serum, 3% BSA, and 0.3% Triton X-100 for 1hour.  
361 Coverslips were then incubated with primary antibody (CD36, ABCG1, EEA1, Rab11, or Lamp1;  
362 1:100-1:300) at 4°C overnight, followed by incubation with the respective secondary antibodies  
363 conjugated to fluorescent labels (Alexa Flour 594, 488, or 647; 1:200 to 1:500) for 1 hour at room  
364 temperature. The sections were mounted with mounting medium containing DAPI (1:100).  
365 BODIPY™ 493/503 staining of macrophages was performed following F4/80-fluorescent  
366 conjugated antibody incubation for 2 hours at room temperature<sup>94</sup>. Slides were washed with PBS,  
367 stained with DAPI and mounted. Immunofluorescent images were captured using a Zeiss LSM880  
368 confocal microscope and analyzed with ZEN-Lite 2012 software and HIH ImageJ software.  
369 Samples stained without the primary antibody were obtained using the same settings as negative  
370 controls. Mean fluorescence intensity (MFI) of antibody staining was determined using NIH  
371 ImageJ software with n=3 or more.

### 372 **Image Choosing**

373 We had two blinded observers select representative images from a panel of images collated  
374 from all experiments performed for any given sample. Representative images from

375 immunofluorescence, Oil Red O and Van Gieson's staining were selected based on and the most  
376 accurate representation of similarity with the mean value for each experimental group. The way to  
377 select a representative image would be an image that is most similar to all of the other images in  
378 the set. Representative images from immunofluorescence, Oil red O and Van Gieson's stainings were  
379 selected based on high quality, resolution, and accurate representation of similarity with the mean value  
380 for each experimental group.

### 381 **Flow cytometry assay**

382 Flow cytometry of elicited primary macrophages: peritoneal macrophages from WT and DKO  
383 mice were isolated as described above and plated in 6 well plates in lipid-deficient medium for 24  
384 hours followed by the treatment with or without 100 $\mu$ g/mL oxLDL in the presence or absence of  
385 clathrin siRNA at 37 $^{\circ}$ C for different time based on the experiment designs. Macrophages were  
386 washed with 1XPBS, dissociated with 1mL non-enzymatic cell dissociation buffer, centrifuged  
387 (300 $\times$ g, 5 minutes), and resuspended in 100 $\mu$ L FACS buffer (1X PBS, 2% FBS, 2mM EDTA)  
388 containing the following: FcR Blocking Reagent, fluorochrome conjugated anti-F4/80, primary  
389 antibodies against CD36 or ABCG1. Cells were incubated with the primary antibodies (1:100) on  
390 ice for 30min, washed with 100 $\mu$ L FACS buffer, spun down and resuspended with 100 $\mu$ L FACS  
391 buffer containing the fluorescent secondary antibodies (1:100). After 30 min, cells were washed  
392 with FACS buffer, fixed with 4% paraformaldehyde (PFA), and resuspended in FACS buffer for  
393 analysis. Single color and no color controls were prepared using elicited macrophages, which were  
394 treated the same as experimental groups. Expression of cell markers was analyzed using a FlowJo  
395 version 10 software. Gating strategies were performed as described in Supplemental Figures S4  
396 and S10. Flow cytometry of DiI-oxLDL treated macrophages: peritoneal macrophages elicited  
397 from WT and DKO mice were incubated in lipid-deficient medium for 24h followed by the



398 treatment of DiI-oxLDL for 2h at 37°C and macrophages were washed with 1XPBS, dissociated  
399 with 1mL non-enzymatic cell dissociation buffer, centrifuged (300xg, 5 minutes), resuspended in  
400 100µL FACS buffer (1X PBS, 2% FBS, 2mM EDTA) containing the following: FcR Blocking  
401 Reagent, fluorochrome conjugated anti-F4/80 antibody staining, fixed and assessed the uptake of  
402 lipoproteins by flow cytometry as described above.

### 403 **Foam cell formation**

404 TG (4%) induced peritoneal macrophages were isolated and plated on 18mm glass coverslips.  
405 Cells were cultured in RPM media (containing 10% lipid-depleted serum and 1% PennStrep) for  
406 24 hours and then treated with 10-100 µg/mL oxLDL for 24 hours <sup>26</sup>. Cells were fixed in 4% PFA  
407 for 10 minutes at room temperature and washed with PBS. For Oil Red O staining, coverslips were  
408 stained with Oil Red O, washed with PBS, counterstained with hematoxylin, washed with PBS,  
409 and then mounted on slides. For Bodipy staining, coverslips were immunofluorescently stained  
410 Bodipy<sup>TM</sup> 493/503 and phalloidin-iFluor 555 reagent for 1 hour at 37°C, counterstaining with  
411 DAPI, and mounting on slides. Negative controls were not treated with oxLDL. Foam cells were  
412 determined as the number of lipid positive cells (Oil Red O positive or Bodipy positive) as a  
413 percentage of total cells. At least 6 fields per cover slip and 6 mice per genotype were used for  
414 quantification.

### 415 **Cell surface biotinylation**

416 Cell surface biotinylation was performed as described previously <sup>26</sup>. Isolated peritoneal  
417 macrophages in the plate were washed with cold PBS, suspended at a concentration of 25x10<sup>6</sup>  
418 cells/mL and treated with 2mM EZ-Link Sulfo-NHS-LC-Biotin reagent on ice for 30 minutes  
419 followed by 3 washes with 100mM Glycine to remove excess biotin and then 3 washes with cold

420 PBS (5min each time). Cells were lysed and pulled down by streptavidin bead: cell lysates were  
421 incubated with neutravidin beads for at least 12 hours at 4°C with rotation, and proteins were eluted  
422 from beads using 4X Laemmli buffer diluted 1:3 in lysis buffer. Cell surface biotinylated proteins  
423 were analyzed by western blotting and quantified using NIH Image J software.

#### 424 **Plasma collection, triglyceride, and cholesterol analysis**

425 For each mouse, 1mL syringe were rinsed with 1mL 0.5M EDTA to coat the inside of the  
426 syringe with EDTA to prevent clotting during blood collection. Blood was collected from the right  
427 atrium of the mouse heart after sacrifice with isoflurane and added to each 1.7mL tube containing  
428 50µL 0.5M EDTA. Blood was centrifuged at 2000xg for 10 minutes at 4°C. Plasma was transferred  
429 to a new tube and stored at -20°C. Plasma cholesterol and triglyceride levels were determined as  
430 described below.

431 Total cholesterol, high-density lipoprotein (HDL) cholesterol and triglycerides in mouse serum  
432 were determined on Ace Axcel Clinical Chemistry System (Alfa Wassermann, West Caldwell,  
433 NJ). Non-HDL cholesterol is calculated as Total Cholesterol – HDL and gives a measure of the  
434 cholesterol carried by all of the atherogenic lipoproteins.

435 Quantification of total cholesterol, HDL and triglycerides in macrophages. Lipids were  
436 extracted from macrophages with hexane:isopropanol (3:2, v:v) as described in Robinet et al <sup>95</sup>.  
437 Solvents were removed by drying with nitrogen gas. Extracts were resolubilized in 5% bovine  
438 serum solution by bath sonication (10 minutes at 37°C), freeze/thaw treatment (1 hour at -80°C)  
439 and followed by probe sonication for 10 seconds. Reconstituted samples were analyzed on Ace  
440 Axcel® Clinical Chemistry System for total cholesterol, HDL and triglycerides as described above  
441 for measurements in mouse serum. Obtained values were normalized to total protein measured in  
442 the cell lysates by Bradford Protein Assay (Bio-Rad).

#### 443 **Macrophage cholesterol efflux assay**

444 Thioglycolate induced peritoneal macrophages from WT, DKO and DKO/ABCG1<sup>fl/+</sup> mice  
445 were plated in RPMI medium for 2-4 hours. Non-adherent cells were removed by washing with  
446 PBS and cells were incubated with radiolabeled medium supplemented with 4  $\mu$ Ci/mL of [<sup>3</sup>H]-  
447 cholesterol (Perkin-Elmer, Waltham, MA, USA), 5% FBS, 1% P/S and 50 $\mu$ g/mL acetyl-LDL for  
448 24 hours. Macrophages were washed twice with warm PBS and incubated with serum-free RPMI  
449 1640 medium supplemented with 0.2% BSA, 2 $\mu$ g/mL acyl-CoA cholesterol acyltransferase  
450 (ACAT) inhibitor and 4 $\mu$ mol/L LXR agonist T0901317 for 18 hours equilibration <sup>58</sup>. After this  
451 equilibration period, cells were washed twice with warm PBS and incubated in serum free RPMI  
452 medium supplemented with or without cholesterol acceptors (10  $\mu$ g/mL ApoA-1 or 25  $\mu$ g/mL  
453 HDL) and 2 $\mu$ g/mL ACAT inhibitor for 4 hours <sup>96</sup>. At the end of the incubation, the efflux media  
454 was collected and filtered through a 0.45- $\mu$ m filter to remove the detached cells. Then, transfer the  
455 efflux medium was transferred to a scintillation vial. The macrophages in the plates were added to  
456 500  $\mu$ L of 0.2N NaOH and incubated on shaker at 4 °C overnight. Cell extract from each well was  
457 transferred to a scintillation vial. 4 mL of scintillation liquid were added to each scintillation vial  
458 and radioactivity was measured by liquid-scintillation counting <sup>97</sup>. The cholesterol efflux to  
459 acceptors was expressed as a percentage of total cholesterol using the following formula: %  
460 cholesterol efflux = (medium [<sup>3</sup>H]-radioactivity [cpm]) / [(medium [<sup>3</sup>H]-radioactivity [cpm] +  
461 [<sup>3</sup>H]-radioactivity from cell extract [cpm])] x 100, where cpm = counts per minute.

#### 462 **Reverse cholesterol transport (RCT) assay**

463 *In vivo* RCT experiment is based on the method detailed by Joan Carles Escolà-Gil et al <sup>97</sup>.  
464 Briefly, macrophages were radiolabeled with [<sup>3</sup>H]-cholesterol (5  $\mu$ Ci/mL) in 10% lipoprotein-  
465 depleted serum, 1% P/S and 50 $\mu$ g/mL acetyl-LDL RPMI media for 48h. Foam cells were washed

466 with serum-free media supplemented with 0.2% BSA and equilibrated for 4h (37 °C, 5 % CO<sub>2</sub>).  
467 Then, [<sup>3</sup>H]-cholesterol-labeled macrophages were detached, spun down and resuspended in PBS.  
468 The injection dose was 0.5 mL per mouse (4x10<sup>6</sup> cpm/mL) administered intraperitoneally into  
469 C57BL/6 WT mice fed on normal diet as indicated in Figure 5C. Mice were then individually  
470 housed in metabolic cages and feces in the cage floor were collected for 2 days. At 48h, mice were  
471 sacrificed and blood, liver, intestinal contents were collected in Figure S8. Serum [<sup>3</sup>H]-cholesterol  
472 was measured by liquid scintillation counting. [<sup>3</sup>H]-HDL cholesterol was determined after  
473 precipitation of ApoB-containing lipoproteins with 0.44mM phosphotungstic acid and 20mM  
474 MgCl<sub>2</sub>. Liver, fecal and intestinal lipids were extracted with hexane- isopropanol (3:2, v:v) and  
475 partitioned against Na<sub>2</sub>SO<sub>4</sub>. The lipid layer was collected and dried for 48h using nitrogen gas in a  
476 fume hood, and [<sup>3</sup>H]-cholesterol radioactivity was measured by liquid scintillation counting (4mL  
477 scintillation fluid for 4 min). The [<sup>3</sup>H]-radioactivity observed in fecal biliary acids was determined  
478 in the remaining aqueous phase of fecal material extracts. The amount of [<sup>3</sup>H]-radioactivity was  
479 expressed as a percentage of the total injected dose, which was taken as 100%.

#### 480 **Statistical analysis**

481 Statistical analysis was processed using GraphPad Prism 9.3 and IBM SPSS Version 26. Data  
482 are shown as mean ± standard deviation (mean ± SD). For in vitro study, all biological replicates  
483 using primary cultured cells or cells lines correspond to independent experiments from distinct  
484 expansions and passage numbers, with technical replicates. Shapiro-Wilk test (P<0.05) was used  
485 to test normality of all data obtained from in vivo study. Comparisons among multiple groups were  
486 performed using one-way analysis of variance (ANOVA) followed by Tukey post hoc multiple  
487 comparisons test or two-way ANOVA followed by Sidak post hoc multiple comparisons test. For  
488 comparisons between two groups, unpaired *t* test was performed to analyze the data. Data that

489 failed normality test or small sample size ( $n < 6$  per group), Mann-Whitney  $U$  test were used to  
490 analyze two-group comparisons and Kruskal-Wallis followed by Dunn post hoc multiple  
491 comparisons test for multi-group comparisons. Raw P values were provided for two-group  
492 comparisons, and adjusted P values were provided for multiple-group comparisons. All  
493 experiments were performed independently, no experiment-wide/across-test multiple test correction  
494 was applied.  
495

## Supplemental Figure Legends

496  
497  
498  
499  
500  
501  
502  
503  
504  
505  
506  
507  
508  
509  
510  
511  
512  
513  
514  
515  
516  
517  
518  
519  
520  
521  
522  
523  
524  
525  
526  
527  
528  
529  
530  
531  
532  
533  
534  
535  
536  
537  
538  
539  
540  
541

### Figure S1A. Overview of single cell RNA sequencing (scRNA-seq) and data analysis.

**Sample preparation:** WT and DKO mice (n=3/group) were fed normal diet or western diet for 16 weeks, followed by the isolation of aortas, enzyme digestion and single cell suspension were prepared by manufacturer's instructions. **10X Genomics- Single-cell cDNA library preparation:** barcoding cells for 10 x genomics, cDNA library construction and scRNA sequencing. **cDNA library sequencing and computational analysis:** Then the sequencing reads were preprocessed by cell ranger, downstream analysis was done by Seurat, Scanpy, and Monocle pipelines.

**Figure S1B. Overview of animal models. (a)** Generating myeloid-specific Epsin deletion mice. **(b)** Generating myeloid-specific Epsin deletion mice in ApoE<sup>-/-</sup> background. **(c)** Generating LysM-DKO/ABCG1<sup>fllox/+</sup> in ApoE-null mouse. **(d)** Generating ABCG1 knockout mice.

**Figure S2. Cell populations were annotated based on marker gene expression. (A)** Dot plot of known marker genes for each cell cluster in Figure 1A. Marker gene expression are colored by red and blue for aortas in WT and LysM-DKO mice on normal diet, respectively. Size of nodes represent percentage of cells expressing a certain gene. **(B)** Dot plot of known marker genes for each major macrophage subcluster. **(C)** Violin plots showing the representative marker gene expression in each major macrophage subcluster in WT and LysM-DKO. **(D)** Feature plots showing the representative M1 and M2 macrophage marker gene expression across all major macrophage subclusters. Log-transformed normalized read count: Read counts for each cell were divided by the total counts for that cell and multiplied by 10,000. This was then natural log transformed using log<sub>1p</sub>.

**Figure S3. Cell proportion changes for each cell type in WT and LysM-DKO.** The bar plots showing the cell proportion of M1 macrophage was decreased, while those of M2 macrophage and M1-M2 transition cells were increased in LysM-DKO compared to WT.

**Figure S4. Metabolite-sensor cell communications related to macrophages. (A-B)** A flow plot of communications comprising senders, metabolites, sensors, and receivers from macrophage subpopulations to all the cell types (A); and from all cell types to macrophages (B). **(C)** A heatmap showing the most variable communications related to cholesterol metabolism in macrophages in the comparison of WT and LysM-DKO aorta.

**Figure S5. The expression levels of cholesterol-producing enzymes and the sensor Cd36 tended to decrease while those of cholesterol-consuming enzymes tended to increase in DKO compared to WT mice. (A)** Violin plots showing the expression levels of cholesterol producing enzymes in DKO and WT macrophage c2. **(B)** Violin plots showing the expression levels of cholesterol consuming enzymes in DKO and WT macrophage c2. **(C)** Dot plot showing the expression levels of cholesterol producing enzymes in DKO and WT macrophage c2. **(D)** Dot plot showing the expression levels of cholesterol consuming enzymes in DKO and WT macrophage c2. **(E)** Violin plot showing the expression level of Cd36 in DKO and WT M1-M2 transition cells. Log-transformed normalized read count: Read counts for each cell were divided by the total counts for that cell and multiplied by 10,000. This was then natural log transformed using log<sub>1p</sub>.

542  
 543 **Figure S6. The expression levels of the producing and consuming enzymes for 25-**  
 544 **hydroxycholesterol in macrophage subpopulations in WT and DKO aorta. (A)** Violin plots  
 545 showing the expression levels of 25-hydroxycholesterol producing and consuming enzymes across  
 546 macrophage subpopulations in WT and DKO. **(B)** Dot plots showing the expression levels of 25-  
 547 hydroxycholesterol producing and consuming enzymes across macrophage subpopulations in WT  
 548 and DKO. Log-transformed normalized read count: Read counts for each cell were divided by the  
 549 total counts for that cell and multiplied by 10,000. This was then natural log transformed using  
 550  $\log_1 p$ .

551  
 552 **Figure S7. RNA-seq analysis of WT and DKO macrophages reveals that Epsins regulate lipid**  
 553 **cholesterol metabolism and efflux pathways. (A)** A volcano plot showing differential gene  
 554 expression in Epsin deficient (DKO) and wild type (WT) macrophages. Red and blue indicate up-  
 555 and down-regulated genes, respectively. **(B)** A heatmap showing the expression of genes involved  
 556 in the cholesterol metabolic process (GO:0008203) and cholesterol efflux (GO:0033344). **(C-E)**  
 557 GSEA demonstrated the tendency of individual pathways to be up- or down- regulated in Epsin  
 558 deficient macrophages compared to wild type (top panels). Genes associated with Fatty acid  
 559 metabolism (HALLMAKR) (C), NR1H3-NR1H2 regulate gene expression linked to cholesterol  
 560 transport and efflux (Reactome) (D), and negative regulation of macrophage derived foam cell  
 561 differentiation (GOBP) (E) are analyzed. The bar plots (bottom panels) showing  $\log_2$  fold change  
 562 of altered genes in these pathways. **(F)** Venn diagrams (top panels) showing the number of  
 563 overlapping up- and down-regulated genes in DKO and CD36 knockout (CD36KO) samples. Bar  
 564 plots (bottom panels) showing the observed numbers of overlapped genes versus numbers  
 565 expected by random chance. The P-value was calculated using two tail Fisher exact test. **(G)** The  
 566 Gene Ontology (GO) enrichment analysis for shared down regulated (top) and up regulated genes  
 567 (bottom) between DKO and CD36KO macrophages. \* Adjusted  $P < 0.05$ , \*\* adjusted  $P < 1 \times 10^{-5}$ .  
 568 For comparison between different genes, the log-transformed values were further scaled using Z-  
 569 score method.

570  
 571 **Figure S8. Gating strategy and clathrin-mediated CD36 internalization. (A)** Macrophages  
 572 isolated from WT (n=6) and DKO (n=6) mice were incubated in lipid-deficient medium for 24h  
 573 followed by treatment with oxLDL for 2h, then staining with CD36-Alex488 and cytometric  
 574 analyses. **(B)** Macrophages isolated from WT (n=6) and DKO (n=6) mice were incubated in lipid-  
 575 deficient medium for 24h followed by the treatment of 10  $\mu\text{g}/\text{mL}$  Dil-oxLDL for 2h at 37°C and  
 576 assessed the uptake of lipoproteins by flow cytometry. The major macrophage population was  
 577 selected in forward vs side scatter plots and single cell determination was performed by FSC-H vs  
 578 FSC-A. CD36 (A) or Dil-oxLDL (B) positive macrophages were presented in Figure 2C and 2H,  
 579 respectively. **(C)** WT and DKO macrophages were incubated in lipid-deficient medium and  
 580 transfected with clathrin siRNA for 24h followed by treatment with or without 100 $\mu\text{g}/\text{mL}$  oxLDL  
 581 for 15 mins at 37°C. Flow cytometry for surface level of CD36.

582  
 583 **Figure S9. The loss of Epsins reduced oxLDL uptake by macrophages. (A)** Isolated peritoneal  
 584 macrophages from WT (n=6) and DKO (n=6) mice were pre-incubated with 25 $\mu\text{g}/\text{mL}$  oxLDL for  
 585 24h in lipid-deficient medium and stained with BODIPY (lipids, green), F4/80 (macrophage, red),  
 586 and DAPI (blue), \*\*WT vs DKO group, n=6,  $P < 0.01$ , scale bar=200 $\mu\text{m}$ . **(B)** ORO staining of

587 peritoneal macrophages, which were pre-incubated with 25µg/mL oxLDL for 24h in lipid-  
588 deficient medium, scale bar=20µm.

589  
590 **Figure S10. Transfection of full-length Epsin1 and constructs with the ENTH and UIM**  
591 **domains deleted into WT macrophages did not affect lipid uptake.** Constructs of FLAG-  
592 Epsin1 WT, ΔENTH, and ΔUIM were transfected into ApoE<sup>-/-</sup>/WT macrophages for 48h and  
593 treated with 100 µg/mL oxLDL for 1h, followed by staining with F4/80 (red), BODIPY (green)  
594 and DAPI (blue). Scale bars=200µm. Statistical analyses are presented in Figure 3E.

595  
596 **Figure S11. Differentially expressed genes between WT and ABCG1 knockout (ABCG1KO)**  
597 **macrophages.** (A) A volcano plot showing differential gene expression in ABCG1KO and WT  
598 macrophages. Red and blue indicate up- and down-regulated genes, respectively. (B) A heatmap  
599 exhibiting the expression values of up- and down-regulated genes in each sample. (C) Bar plots  
600 showing log<sub>2</sub> fold changes of the top 30 up- and down-regulated genes between ABCG1KO and  
601 WT macrophages. Up- (red) and down-regulated (blue) genes are indicated. (D-F) GSEA (top  
602 panels) indicated the tendency of individual pathways to be up- or down-regulated in response to  
603 DKO or ABCG1KO compared to WT cells. Genes associated with cell activation involved in  
604 immune response (GO:0002263) (D), regulation of leukocyte migration (GO:0002685) (E), and  
605 leukocyte proliferation (GO:0070661) (F) were analyzed. The bar plots (bottom panels) showing  
606 log<sub>2</sub> fold change of altered genes in these pathways. For comparison between different genes, the  
607 log-transformed values were further scaled using Z-score method.

608  
609 **Figure S12. Schematic of the quantification for radiolabeled cholesterol.** [<sup>3</sup>H]-cholesterol was  
610 measured in serum and HDL after precipitating ApoB-containing lipoproteins. Liver, feces and  
611 intestinal lipids were extracted with hexane-isopropanol and partitioned against Na<sub>2</sub>SO<sub>4</sub>. Liver  
612 [<sup>3</sup>H]-radioactivity was determined in the upper layer, which contains the [<sup>3</sup>H]-cholesterol. In the  
613 feces extract, the amount of [<sup>3</sup>H]-radioactivity was determined in the upper layer (neutral sterols)  
614 and the lowest layer (bile acids). In the intestinal contents, [<sup>3</sup>H]-radioactivity was determined in  
615 the upper layer.

616  
617 **Figure S13. Gene expression levels of indicated genes in WT and DKO macrophage.**  
618 Peritoneal macrophages were isolated from WT (n=5) and DKO (n=5) mice. Total RNA was  
619 extracted and mRNA levels of ABCG1, Epsin1, and Epsin2 were measured (n=5/group).

620  
621 **Figure S14. Gating strategy and clathrin mediated-ABCG1 endocytosis.** (A) Macrophages  
622 isolated from WT and DKO mice were incubated in lipid-deficient medium and treated with LXR  
623 agonist for 24h followed by treatment with or without 100 µg/mL oxLDL for 5min, 15min, and  
624 45min, and then stained with ABCG1. Surface levels of ABCG1 were assessed by flow cytometry.  
625 The major macrophage population was selected in forward versus side scatter plots and single cell  
626 determination was performed by FSC-H vs FSC-A. Isotype controls were gated in the histogram  
627 as M1 for the negative control of experimental groups for Figure 6C. (B) Statistical analysis is  
628 presented for Figure 6C. At least three independent experiments were performed for statistical  
629 analysis. Data are presented as mean ± SD. (C) WT and DKO macrophages were incubated in  
630 lipid-deficient medium and transfected with clathrin siRNA for 24h followed by treatment with or  
631 without 100µg/mL oxLDL for 15 mins at 37°C. Flow cytometry for surface level of ABCG1.

632



633 **Figure S15. The expression of ABCG1 decreased with progression of atherosclerotic lesions**  
 634 **in humans and mice. (A-B)** Immunostaining of CD68 (red), ABCG1 (green) and DAPI (blue) of  
 635 human patient aortic arch sections (A, n=6) and mouse aortic root sections (B, n=6) in early and  
 636 advanced stage of atherosclerosis (white dashed line outlined in CD68). Mean fluorescence  
 637 intensity (MFI), scale bar, A=50 $\mu$ m, B=200 $\mu$ m.

638  
 639 **Figure S16. Characterization and silencing efficacy of S2PNP-conjugated siEpsin1/2 NPs. (A)**  
 640 Schematic of the targeted hybrid siRNA NP platform composed of a lipid-PEG shell with a lesion  
 641 macrophage specific targeting ligand, S2P peptide, and a PLGA core. **(B-C)** Macrophages from  
 642 WT mice were treated with S2PNP-siCtrl or S2PNP-siEpsin1/2 for 24h, RNA and proteins were  
 643 isolated, qRT-PCR (B) and western blot (C) was performed to check the expression of Epsin 1 and  
 644 2 levels (n=3).

645  
 646 **Figure S17. S2PNP-siEpsin1/2 treated macrophages show reduced foam cell formation. (A-**  
 647 **B)** Macrophages isolated from ApoE<sup>-/-</sup> mice were incubated in lipid-deficient medium and treated  
 648 with S2PNP-siCtrl or S2PNP-siEpsin1/2 for 48h, follow with treatment of 100  $\mu$ g/mL oxLDL (A)  
 649 or serum (B) collected from ApoE<sup>-/-</sup> mice fed a WD for 8 weeks. ORO staining was performed,  
 650 scale bar=50 $\mu$ m.

651  
 652 **Figure S18. S2PNP-siEpsin1/2 inhibits lesion formation and macrophage accumulation in**  
 653 **early stage of atherosclerosis. (A)** Male ApoE<sup>-/-</sup> mice were fed a WD for 8 weeks followed by  
 654 treatment with S2PNP-siCtrl or S2PNP-siEpsin1/2 for 3 weeks (2 doses per week). **(B)** WB of  
 655 Epsin 1 and 2 after treatment with S2PNP-siCtrl or S2PNP-siEpsin1/2 NPs using lesional lysates  
 656 from the aortas (n=4 times). **(C-D)** Aortic roots from S2PNP-siCtrl treated ApoE<sup>-/-</sup> or S2PNP-  
 657 siEpsin1/2 siRNA treated ApoE<sup>-/-</sup> mice were stained with the macrophage marker CD68 (solid  
 658 white line) and Epsin1 or Epsin2 (dashed white line), Epsin 1 and 2 mean fluorescence intensity  
 659 (MFI) were analyzed (n=5, scale bars=500  $\mu$ m). **(E)** *En face* ORO staining of aortas (upper panel)  
 660 and aortic root sections (lower panel) of hearts from baseline, S2PNP-siCtrl or S2PNP-siEpsin1/2  
 661 treated ApoE<sup>-/-</sup> mice fed a WD. Scale bar; aorta=5mm, aortic root=500 $\mu$ m.

662  
 663 **Figure S19. Silencing lesional macrophage Epsin1/2 by S2PNP-siEpsin1/2 NP-treatment**  
 664 **stabilized plaques in a progression model of atherosclerosis.** ApoE<sup>-/-</sup> mice fed a WD for 17  
 665 weeks followed by treatment with S2PNP-siCtrl or S2PNP-siEpsin1/2 for 3 weeks (two doses per  
 666 week). Van Gieson's staining of brachiocephalic artery (BCA) (upper panel) and aortic root (lower  
 667 panel) sections from baseline, S2PNP-siCtrl-, or S2PNP-siEpsin1/2-treated ApoE<sup>-/-</sup> mice was  
 668 performed (arrows indicate the elastic fibers, n=6, scale bar=250  $\mu$ m).

669  
 670 **Figure S20. Delivery of S2PNP-siEpsin1/2 does not change cholesterol and triglyceride levels**  
 671 **of ApoE<sup>-/-</sup> mice fed a WD.** Plasma from ApoE<sup>-/-</sup> mice fed a WD for 17 weeks (before NP injection),  
 672 followed by an additional 3 weeks of treatment with S2PNP-siCtrl or S2PNP-siEpsin1/2, showed  
 673 no alteration in triglyceride, cholesterol, HDL and non-HDL (LDL/VLDL) cholesterol levels  
 674 (n=5).

675  
 676 **Figure S21. Silencing macrophage Epsin1/2 by S2PNP-siEpsin1/2 NPs reduces lesion size in**  
 677 **a regression model of atherosclerosis. (A)** ORO staining of BCA sections in baseline, S2PNP-  
 678 siCtrl or S2PNP-siEpsin1/2 treated PCSK9-mice was performed and lesions were indicated (dash

679 lines) (n=6, scale bar=500 $\mu$ m). (B) Van Gieson's staining of BCA sections from above three  
 680 groups was performed (n=6, scale bar=500 $\mu$ m). (C) qRT-PCR analysis to confirm expression of  
 681 the indicated genes (n=3).

682  
 683 **Figure S22. S2PNP-siEpsin1/2 delivery inhibits the progression and regression of**  
 684 **atherosclerosis in female mice.** (A) Female ApoE<sup>-/-</sup> mice fed a Western Diet (WD) for 8 weeks  
 685 followed by treatment of S2PNP-siCtrl or S2PNP-siEpsin1/2 for 3 weeks (2 doses per week). (B)  
 686 Female ApoE<sup>-/-</sup> mice fed a Western Diet (WD) for 17 weeks followed by treatment of S2PNP-  
 687 siCtrl or S2PNP-siEpsin1/2 for 3 weeks (2 doses per week, n=6mice per group). (C) Female  
 688 C57BL/6 WT mice were injected twice with PCSK9-AAV8 (D377Y) virus and fed a WD for 16  
 689 weeks and followed by normal diet feeding with the treatment of S2PNP-siCtrl or S2PNP-  
 690 siEpsin1/2 for 4 weeks (2 doses per week). (D) Statistic analysis of A. (E) Statistic analysis of B.  
 691 (F) Statistic analysis of C. Scale bar: A, B, C=5mm.

692  
 693 **Figure S23. Knockdown of Epsin1/2 in THP-1 macrophages show reduced lipid uptake, foam**  
 694 **cell formation and increased cholesterol efflux to HDL.** THP1 human monocytes-derived  
 695 macrophages were differentiated with 10 ng/ml phorbol 12-myristate 13-acetate (PMA) for 48  
 696 hours and transfected with control siRNA and human epsin 1 and 2 siRNAs (2 $\mu$ g/each siRNA) for  
 697 24 hours. (A) Western blot was performed to confirm the knockdown of Epsin 1 and 2 in  
 698 transfected THP1 macrophages. (B) Transfected THP1 macrophages were treated with 25 $\mu$ g/mL  
 699 oxLDL for 24h in lipid-deficient medium. Oil Red O staining was performed to assess lipid  
 700 accumulation and foam cell formation. (C) Transfected THP1 macrophages were incubated in  
 701 lipid-deficient medium for 24h followed by the treatment with DiI-oxLDL for 2h at 37<sup>o</sup>C to assess  
 702 the lipid uptake. scale bar: B, C=50 $\mu$ m. (D) *In vitro* [<sup>3</sup>H]-cholesterol labeled transfected THP1  
 703 macrophages were incubated in the presence or absence of HDL (25 $\mu$ g/mL) and ApoA-1  
 704 (10 $\mu$ g/mL) in the presence of 3 $\mu$ mol/L LXR agonist (T0901317) (n=9).

705  
 706 **Figure S24. Epsins facilitates CD36-mediated lipid uptake and degradation of ABCG1 and**  
 707 **LRP1 in THP1 macrophages.** THP1 human monocytes-derived macrophages were differentiated  
 708 with 10 ng/ml phorbol 12-myristate 13-acetate (PMA) for 48 hours and transfected with control  
 709 siRNA and human epsin 1 and 2 siRNAs (2 $\mu$ g/each siRNA) for 24 hours. (A-B) Transfected THP1  
 710 macrophages were incubated in lipid-deficient medium for 24h and treated with or without  
 711 100 $\mu$ g/mL oxLDL for 45 min followed by staining with anti-CD36 (A) or anti-LRP1 (B)  
 712 antibodies and analyzed by flow cytometry. (C) Transfected THP1 macrophages were treated with  
 713 3 $\mu$ mol/L liver X receptor (LXR) agonist in lipid-deficient medium for 24h, then treated with or  
 714 without 100 $\mu$ g/mL oxLDL for 45 min followed by staining with Anti-ABCG1 antibody and  
 715 analyzed by flow cytometry. (E-G) Statistic analysis for A-C, n=5 per group.

716  
 717 **Figure S25. Summary schematic diagram of the study.** (A) In the progression model of  
 718 atherosclerosis, the plaque size and lesions increase in the artery on western diet feeding. The  
 719 delivery of S2PNP-siEpsin1/2 significantly slowed the progression of atherosclerosis compared to  
 720 S2PNP-siCtrl group. In the regression model of atherosclerosis, plaque size and lesion area were  
 721 dramatically reduced with the intravenously injection of S2PNP-siEpsin1/2. (B-C). Under the  
 722 stimuli of oxLDL, Epsin binds to CD36 and ABCG1 through Epsin ENTH and Epsin UIM  
 723 domains, respectively. In B, Epsin facilitates CD36-mediated lipid uptake via recycling  
 724 endosomes. The loss of Epsin impairs the internalization of CD36, which results in reduced lipid

725 uptake. While in C, Epsin promotes endocytic degradation of ABCG1 via lysosomes, which leads  
726 to reduced total and surface level of ABCG1.

727

728

729

730  
731  
732  
733

## Supplemental Figures

**Figure S1A**

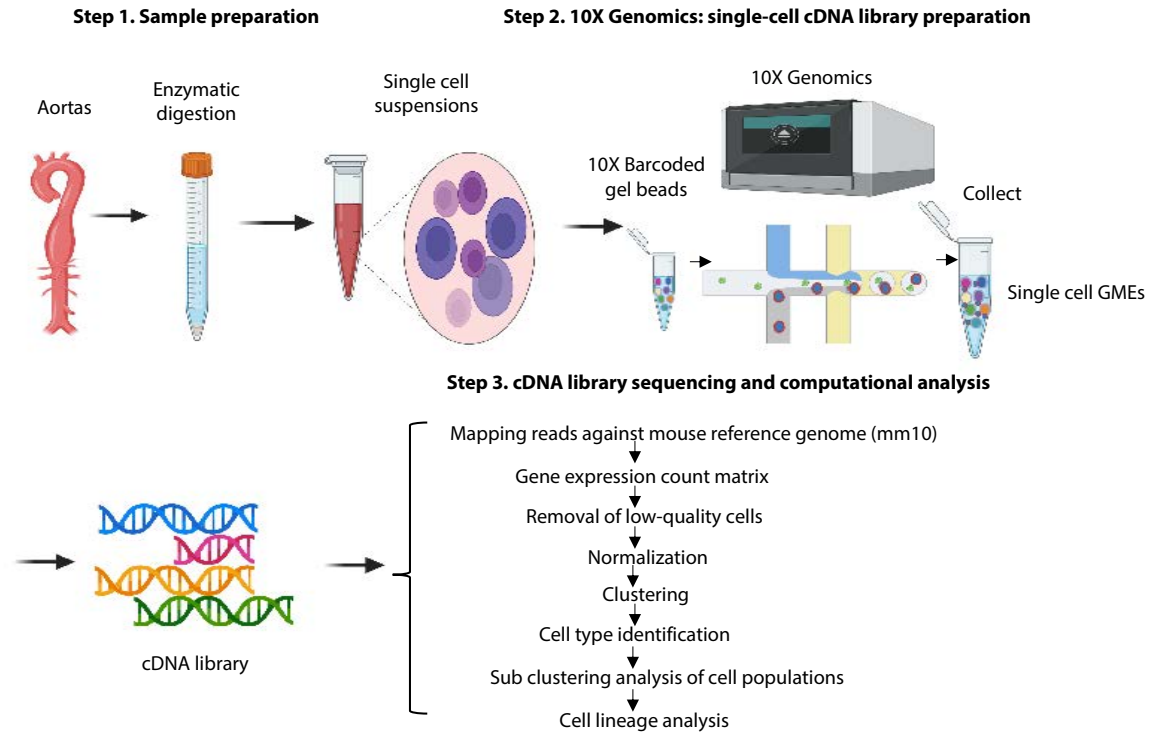

734  
735

736 **Figure S1B**  
737

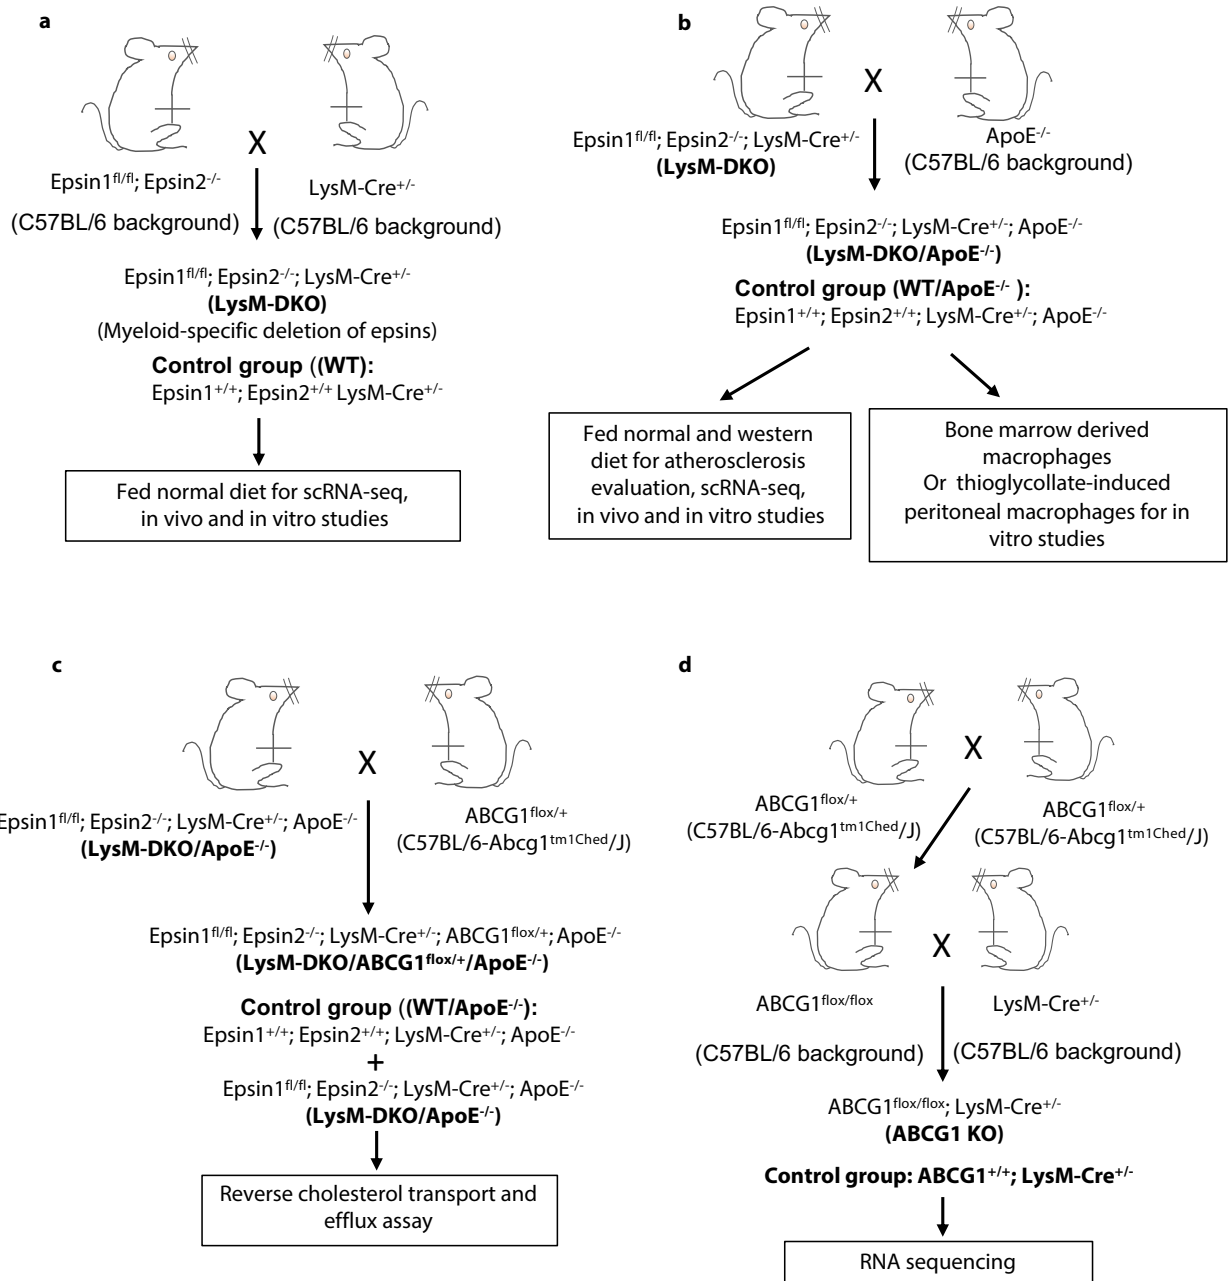

738  
739



743 **Figure S3**  
744

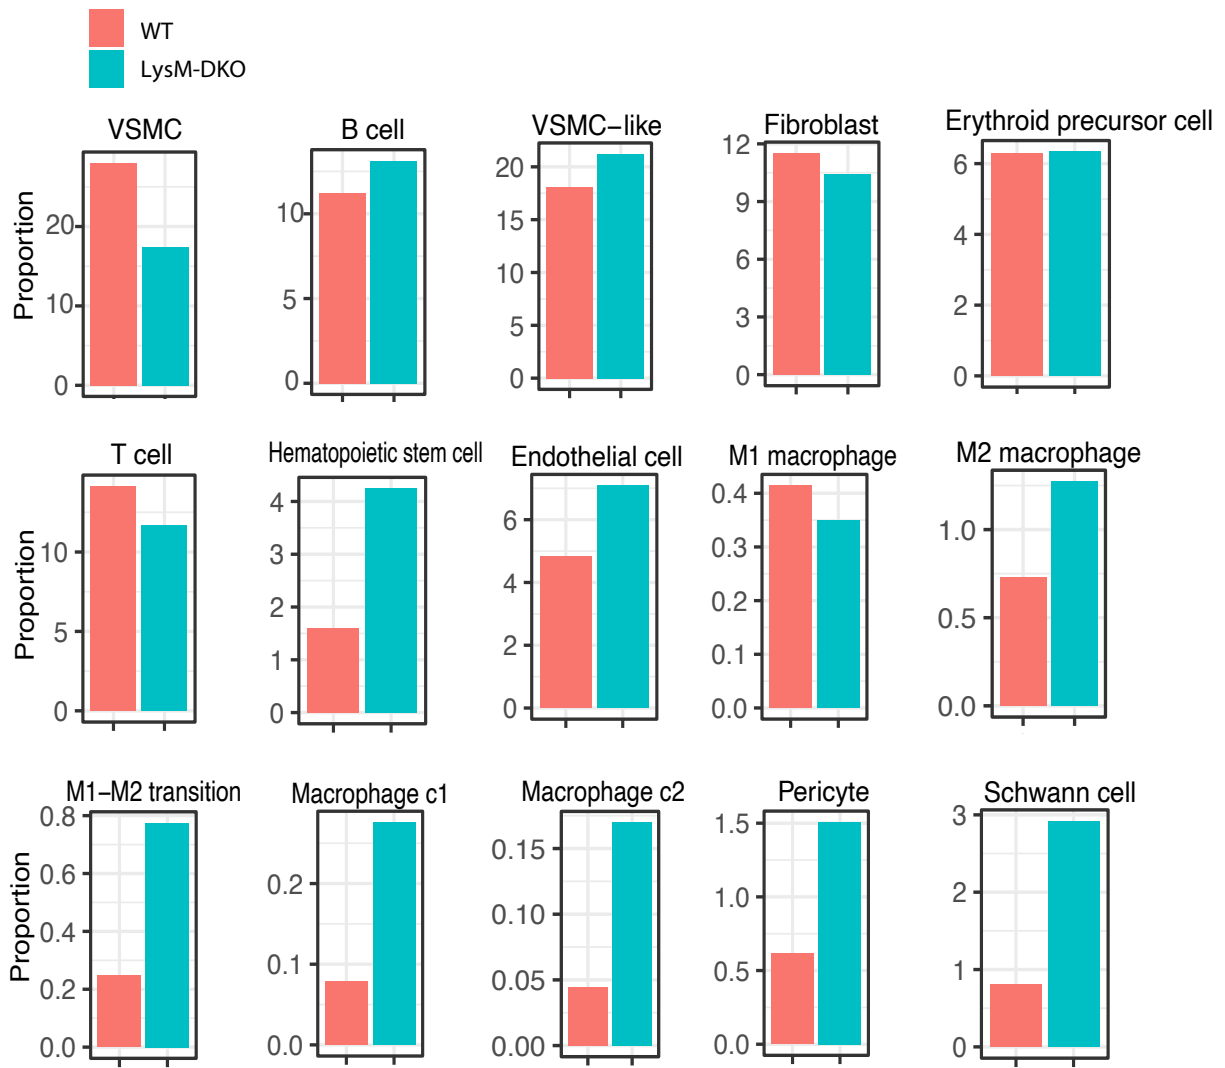

745  
746

747 **Figure S4**  
748

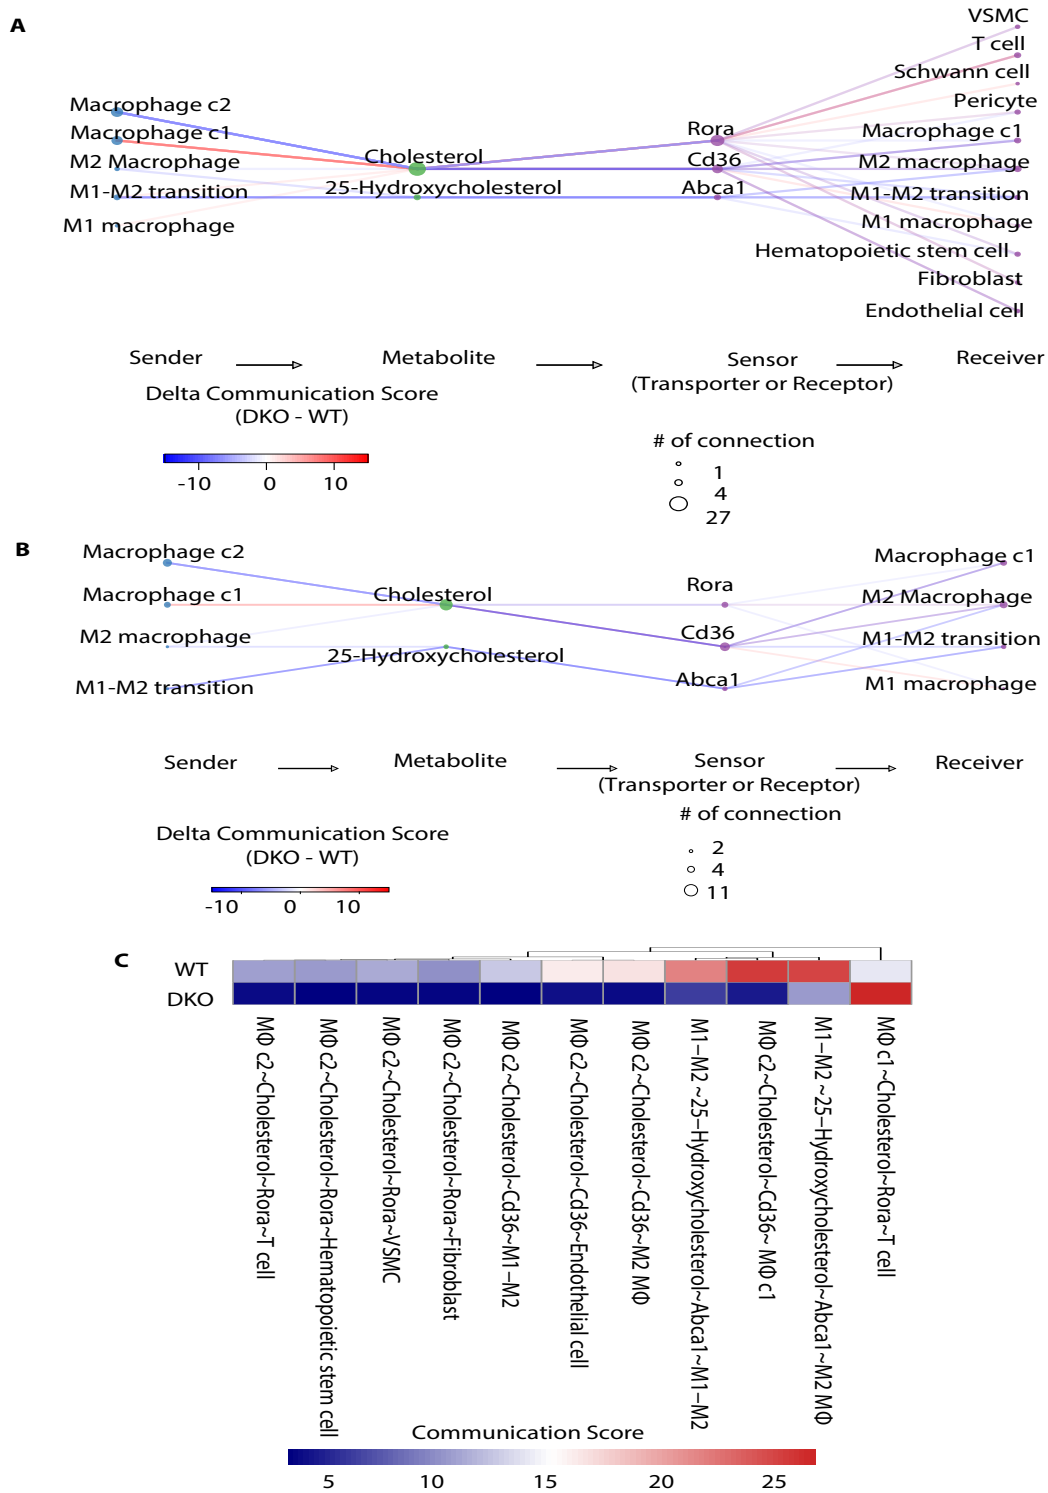

749  
750



751 **Figure S5**  
752

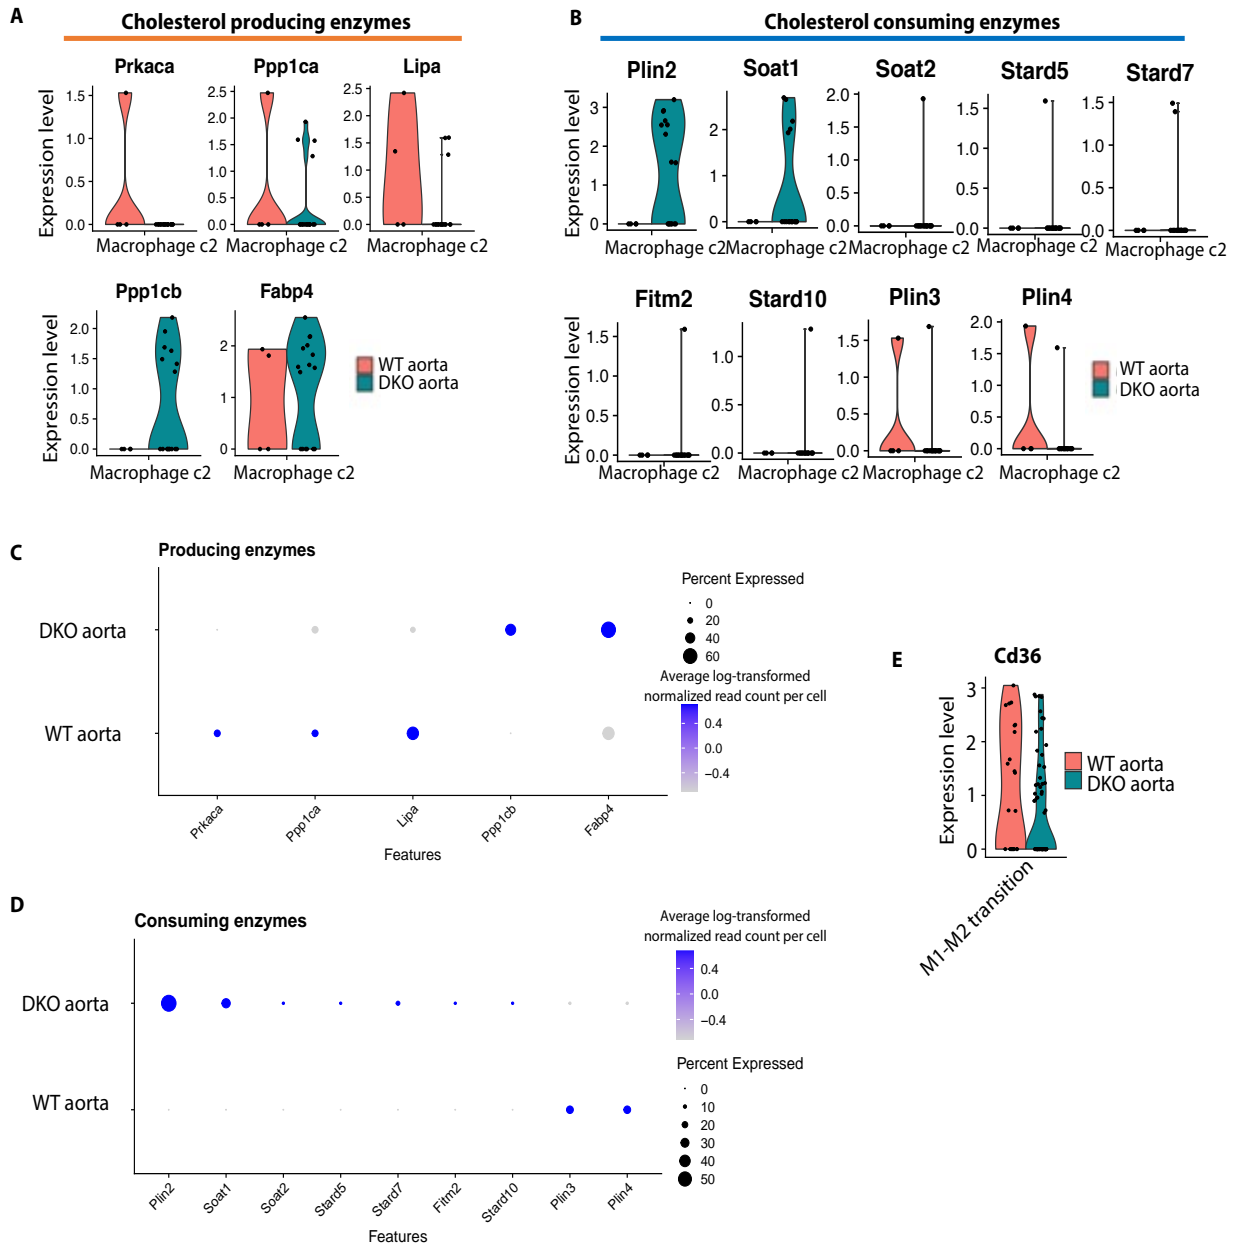

753

754 **Figure S6**  
755

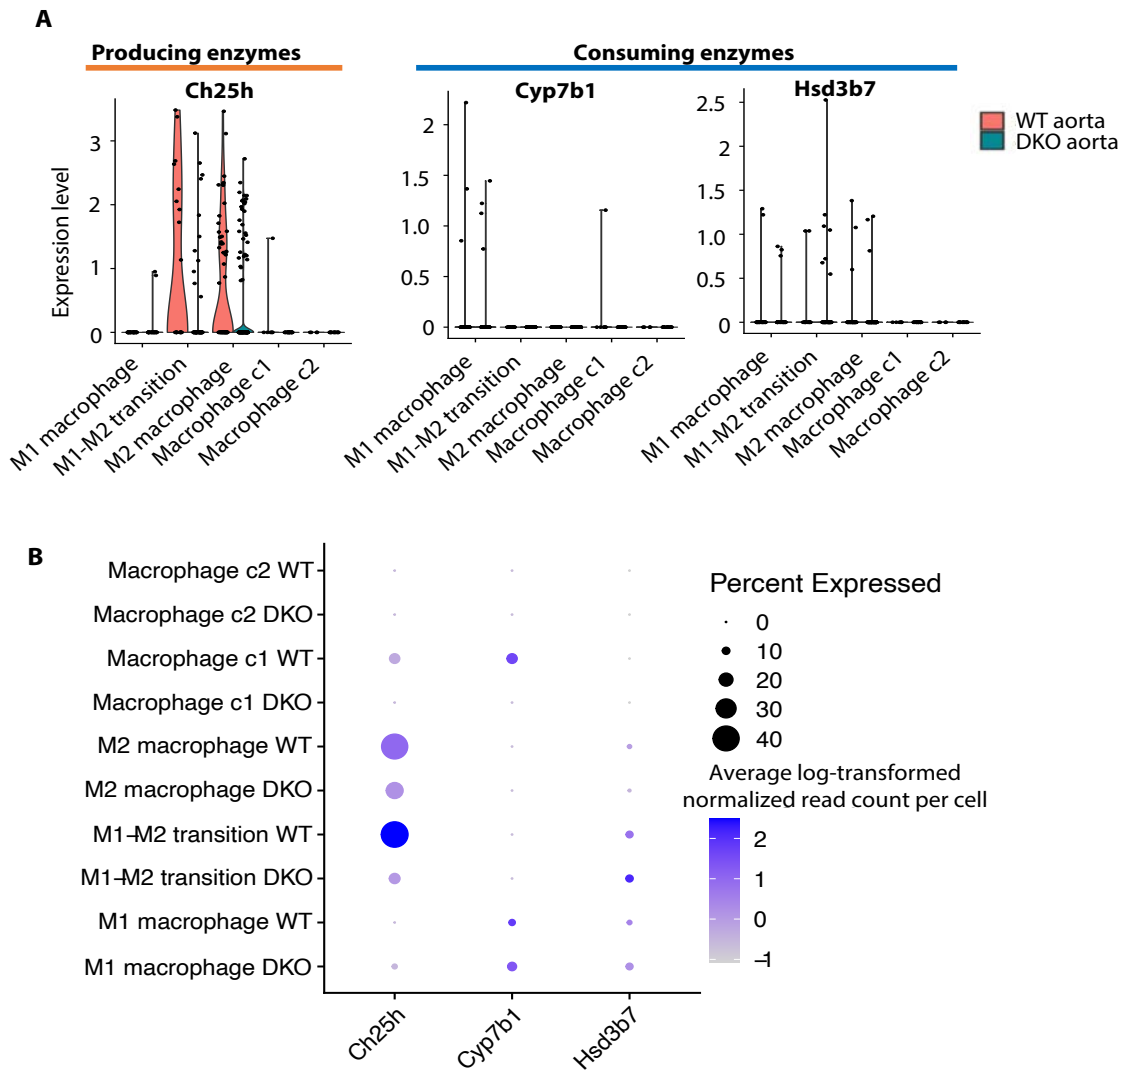

756  
757

758 **Figure S7**  
759

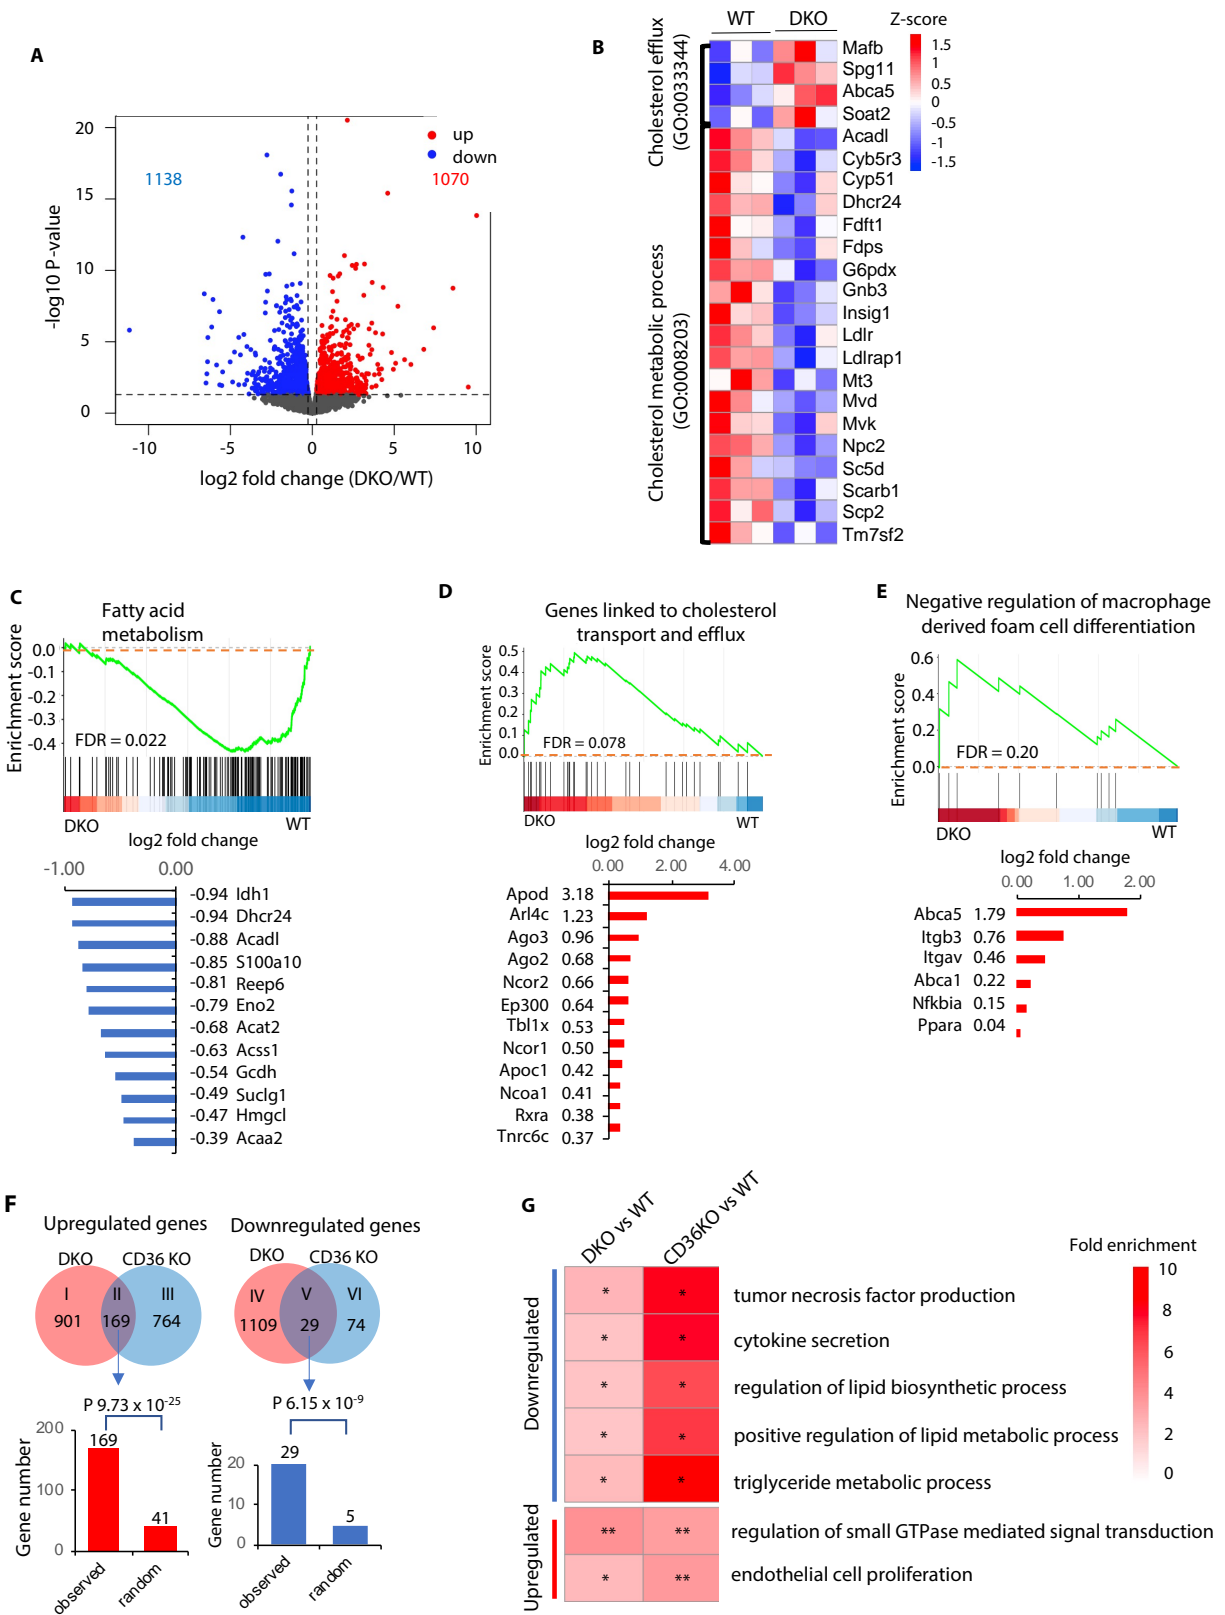

761 **Figure S8**  
762

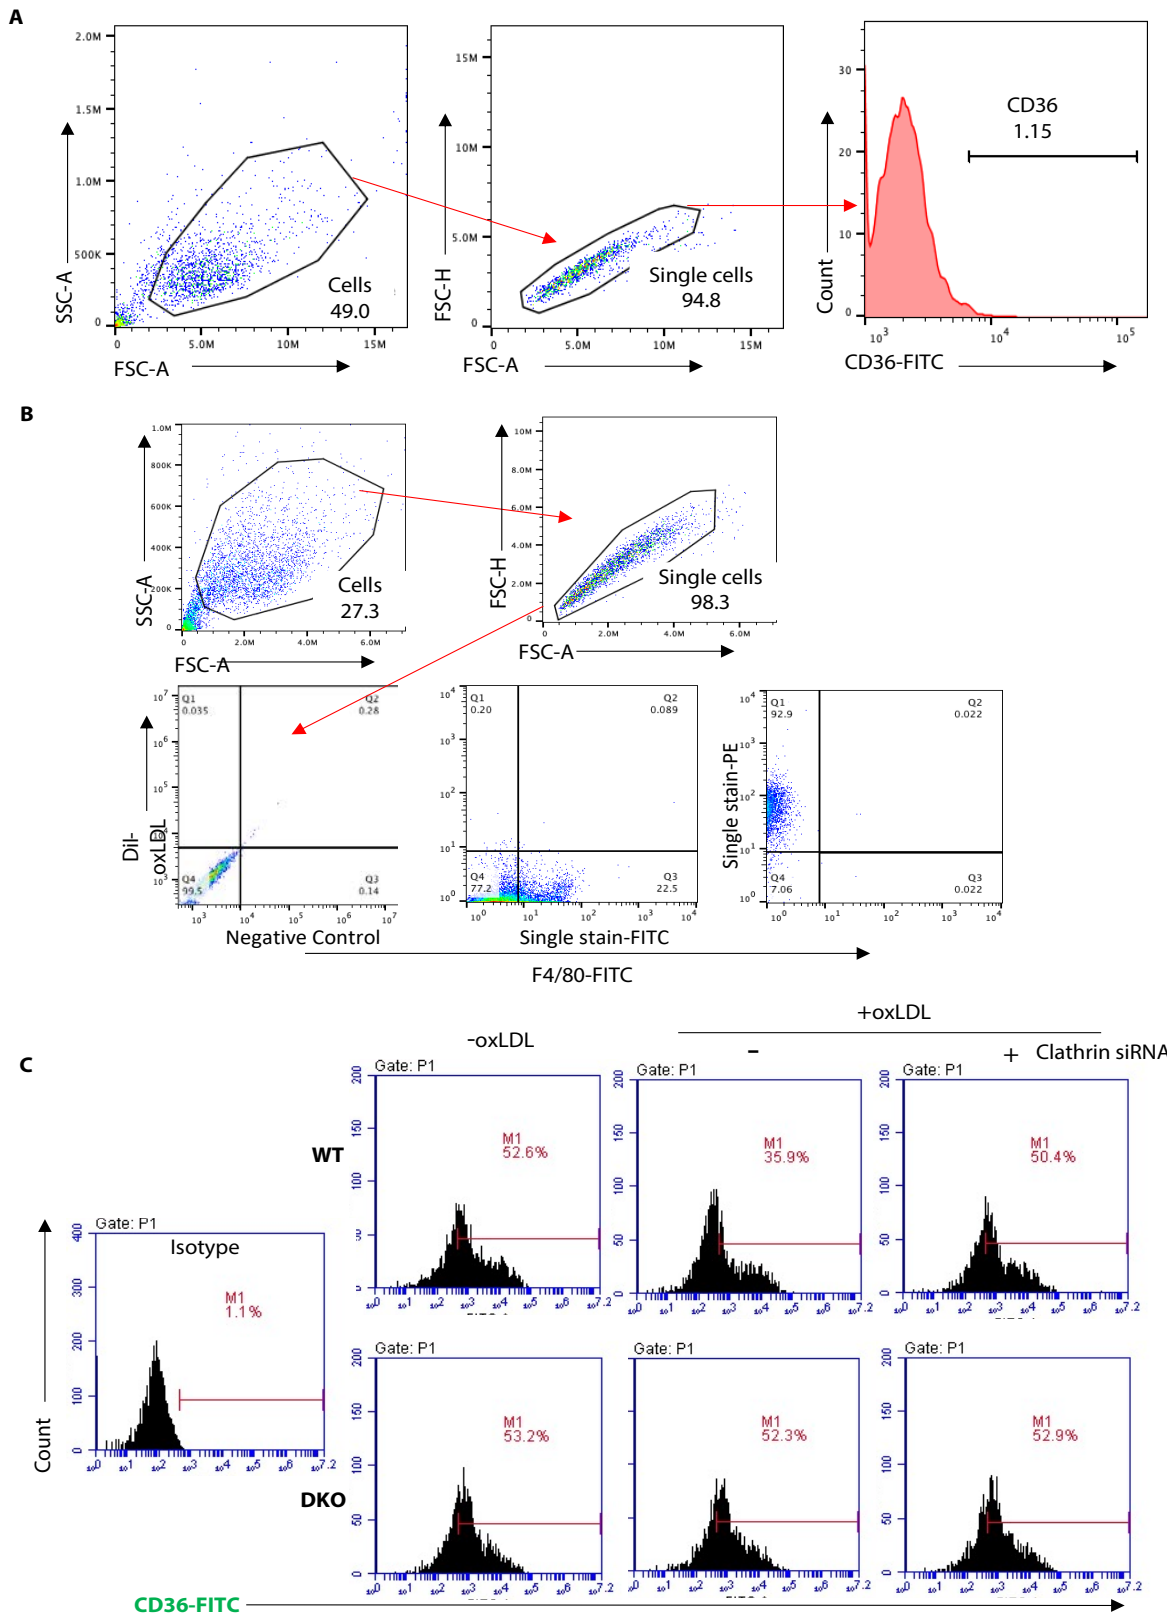

764 **Figure S9**  
765  
766

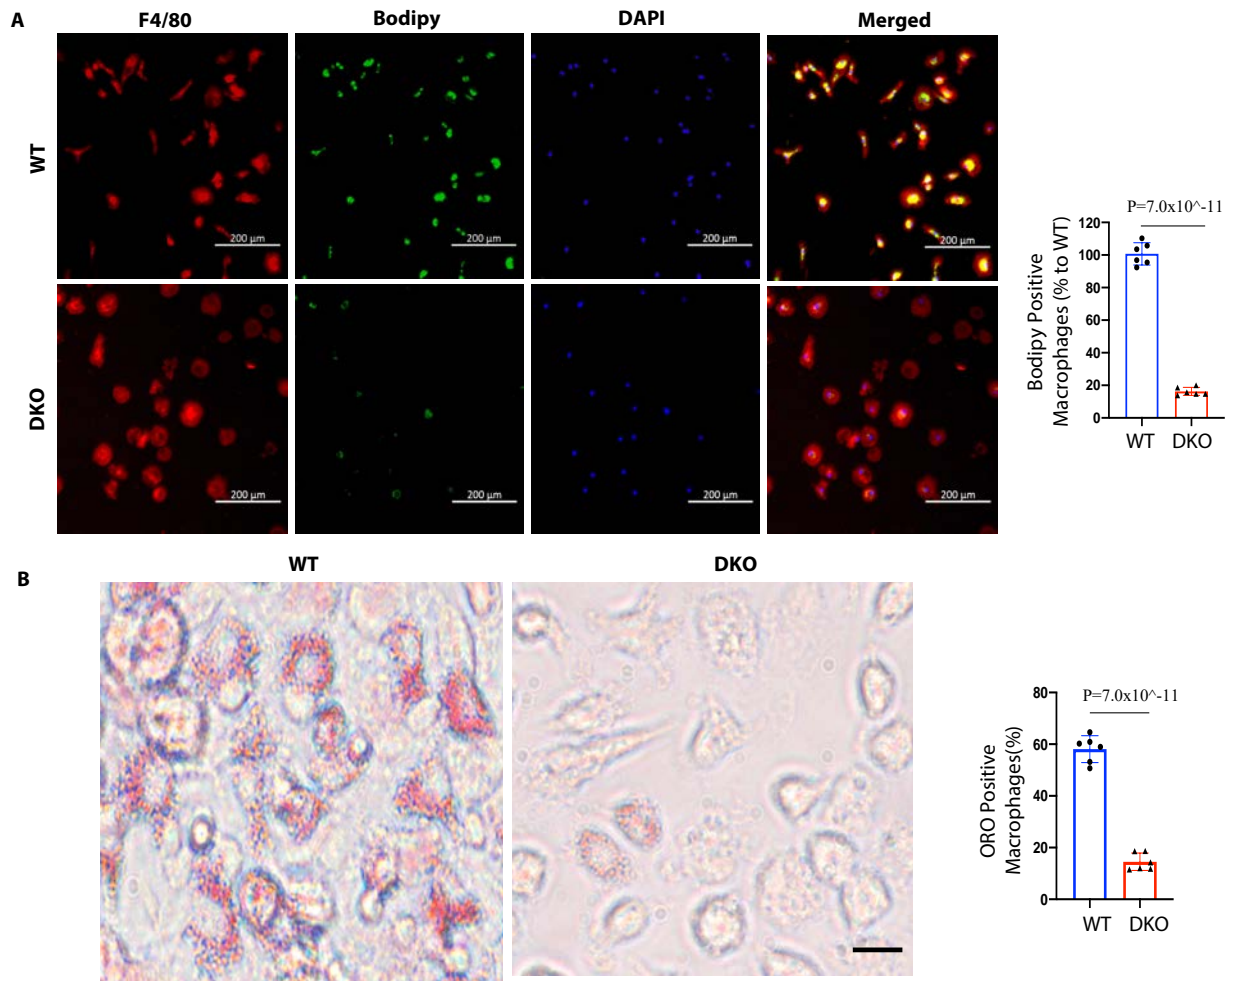

767  
768

769 **Figure S10**  
770  
771

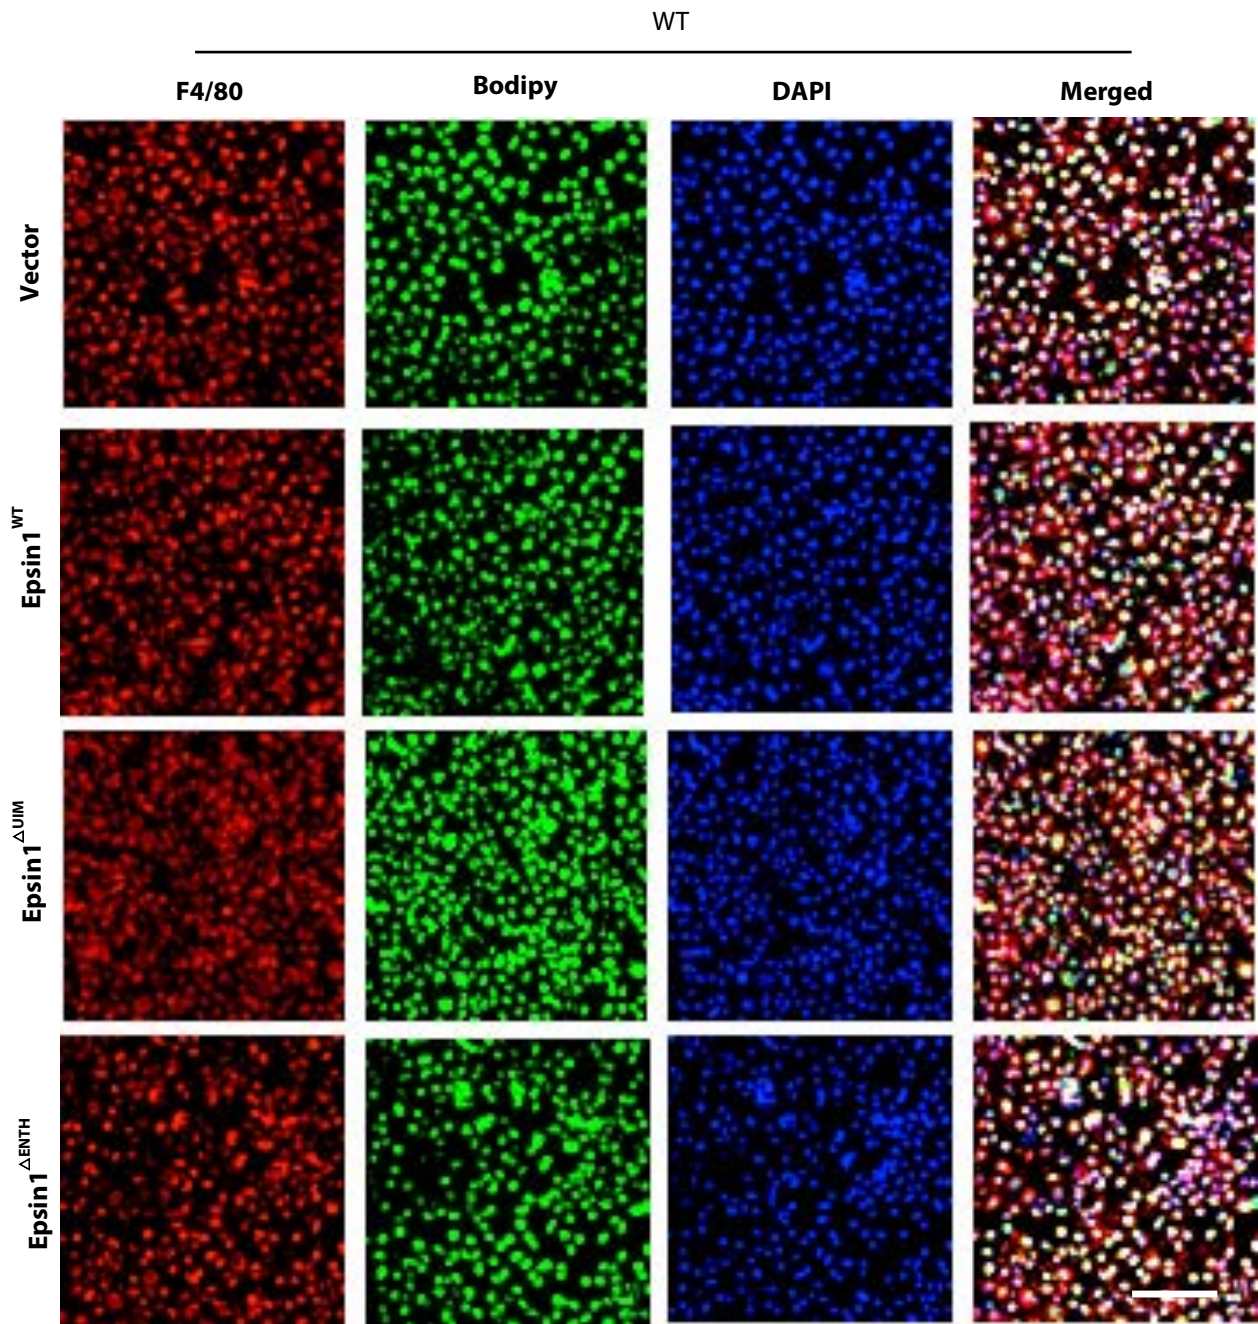

772 **Figure S11**  
773

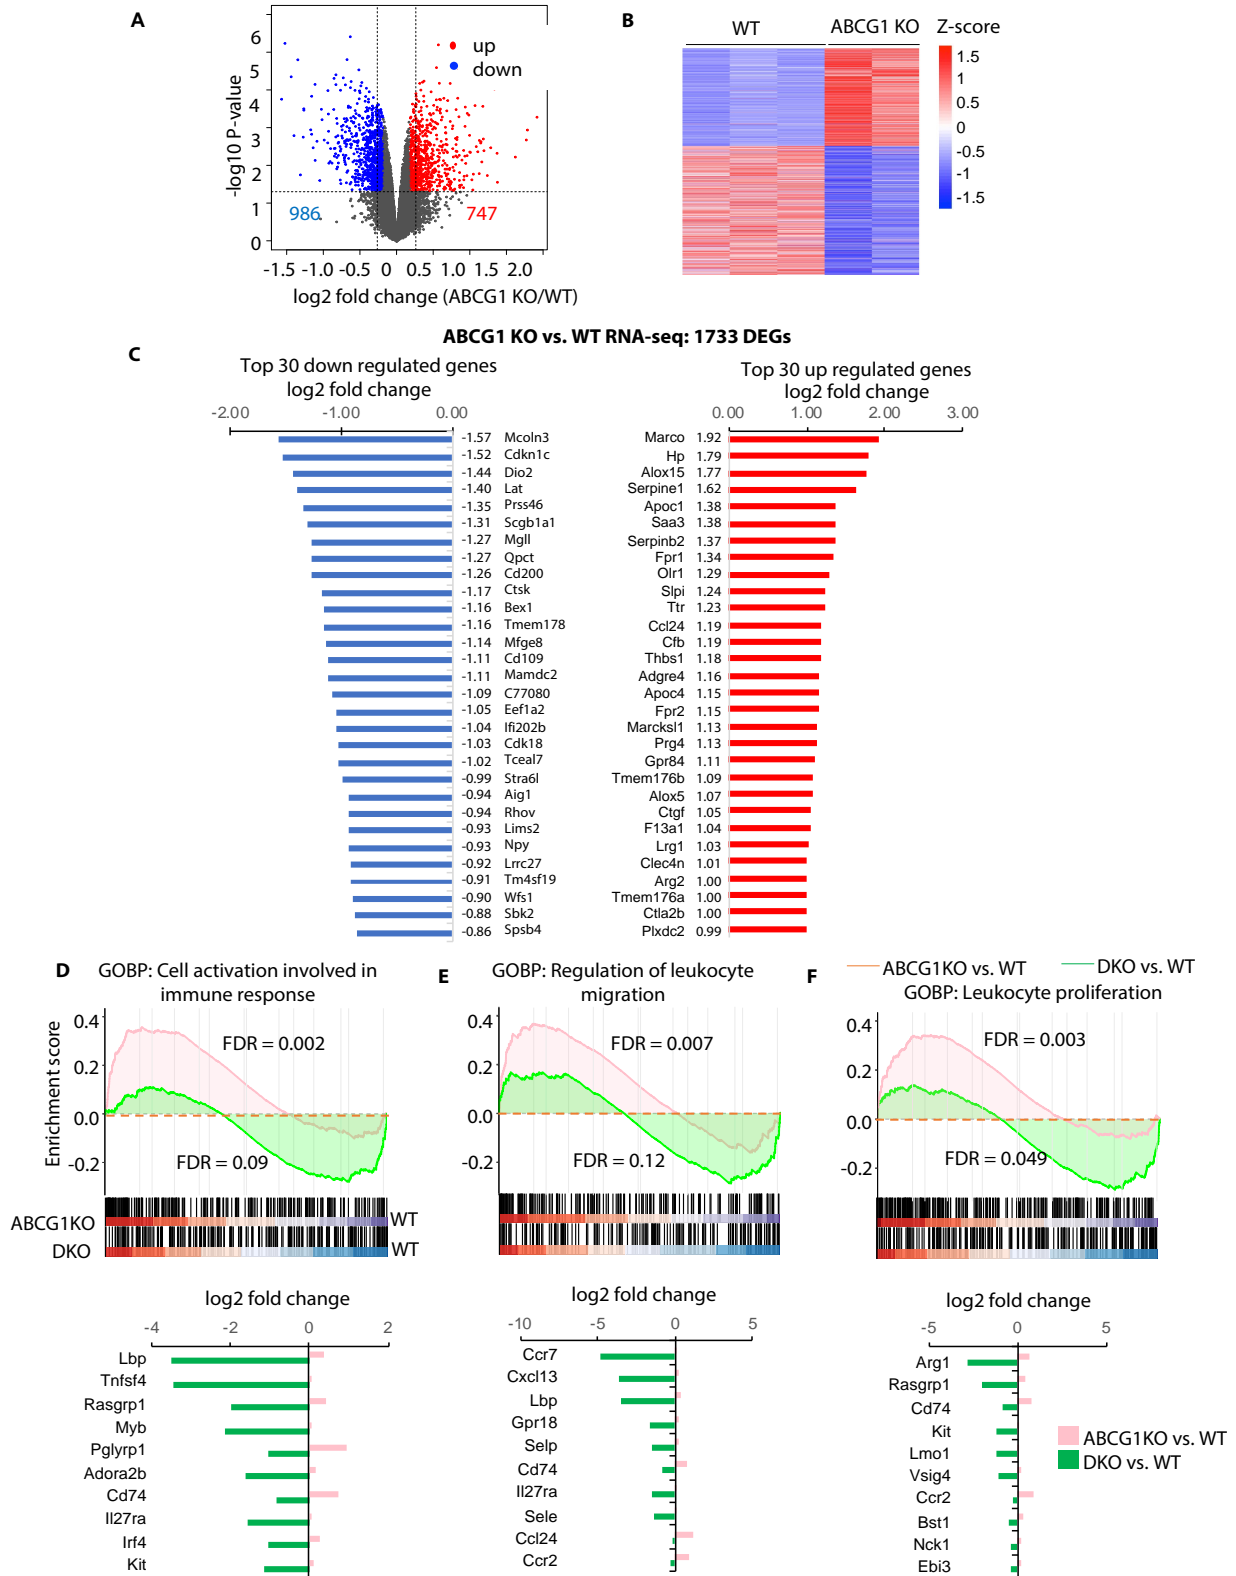

774

775 **Figure S12**  
 776  
 777

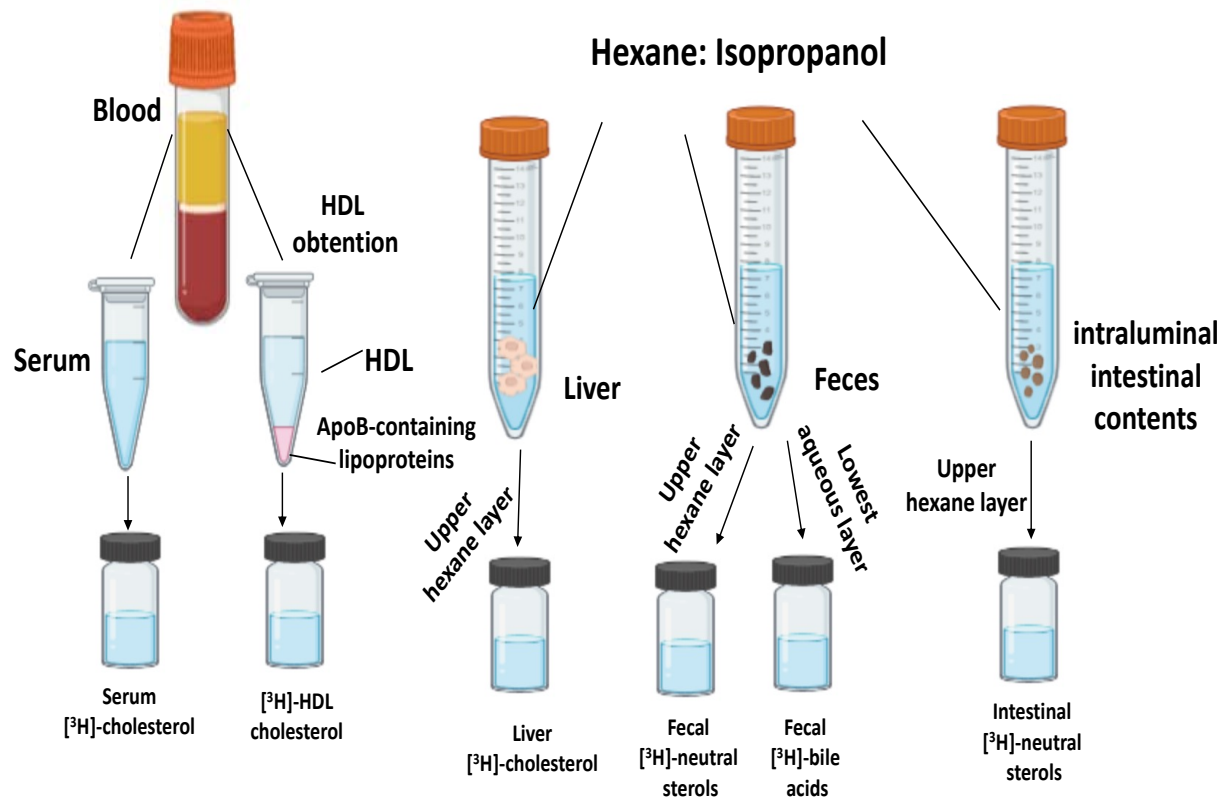

778  
 779  
 780  
 781 **Figure S13**  
 782  
 783

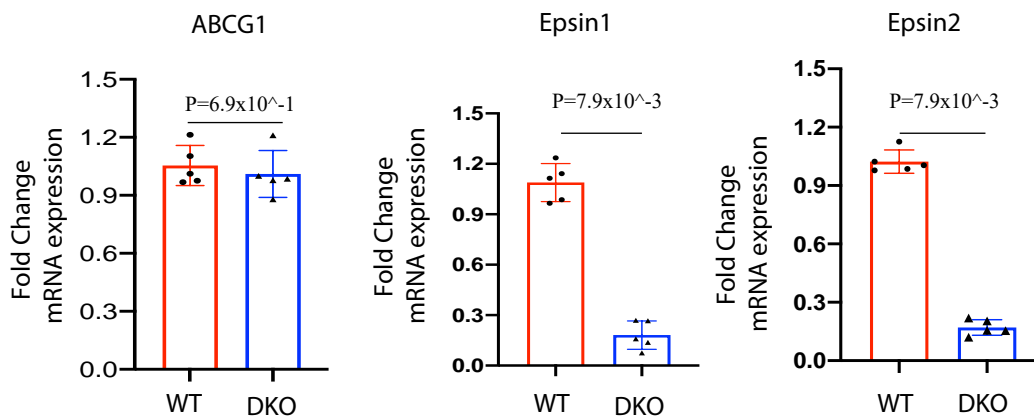

784  
 785  
 786



787  
788  
789

Figure S14

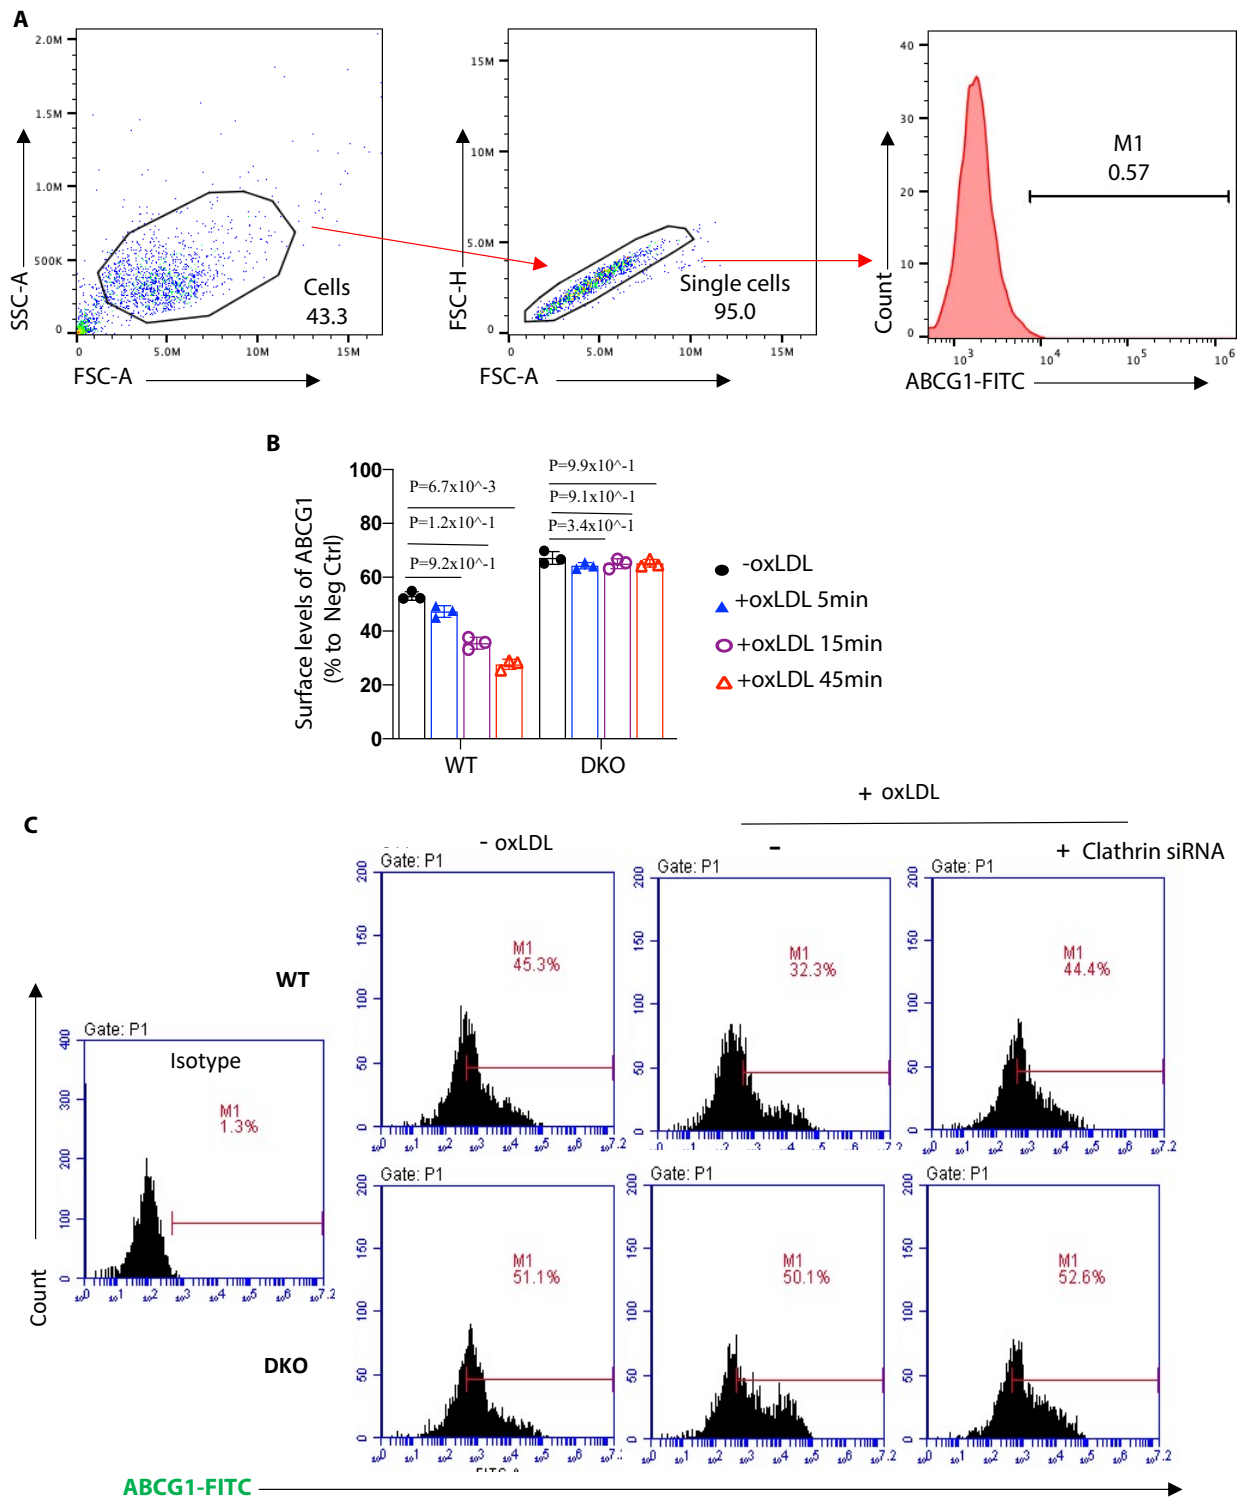

790  
791

792 **Figure S15**  
 793  
 794

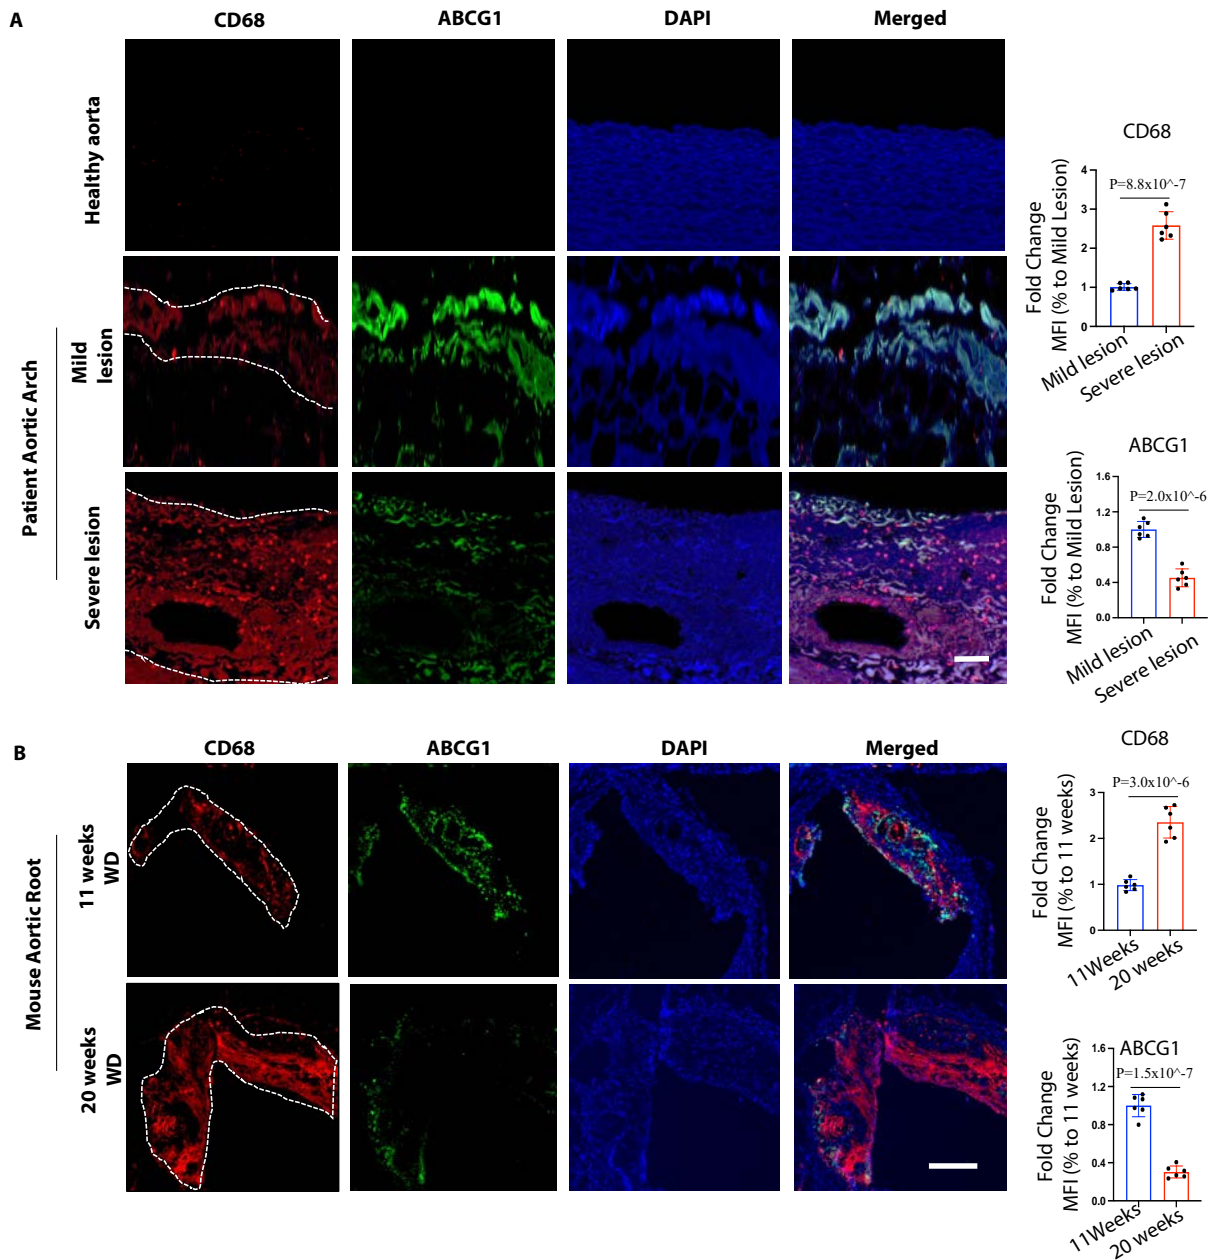

795  
 796

797 **Figure S16**  
 798  
 799

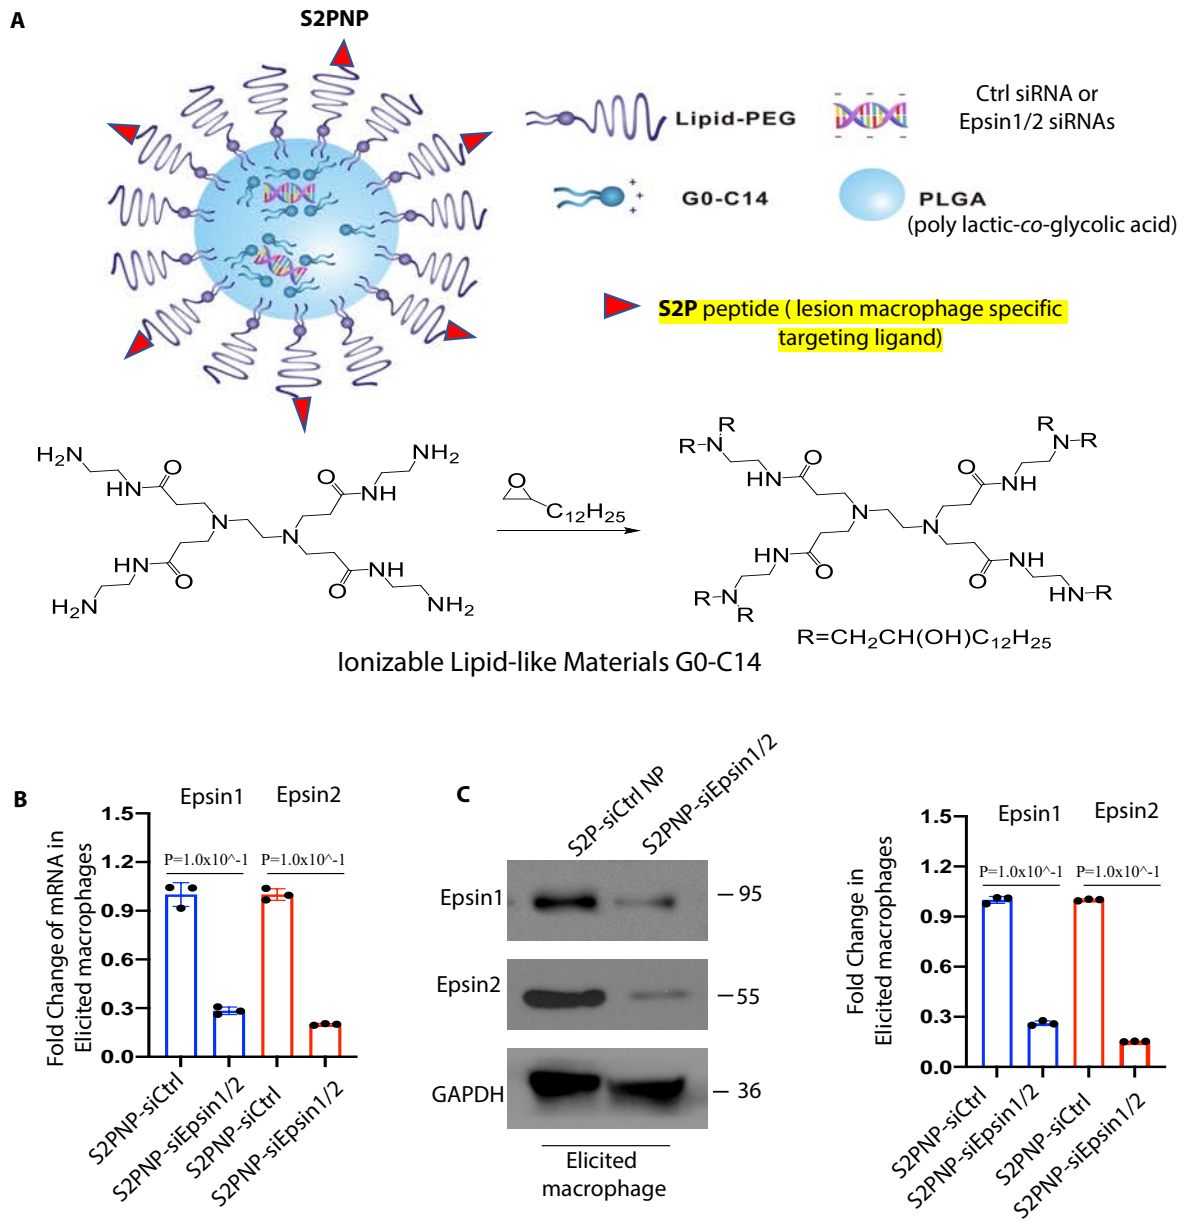

800

801 **Figure S17**  
 802  
 803

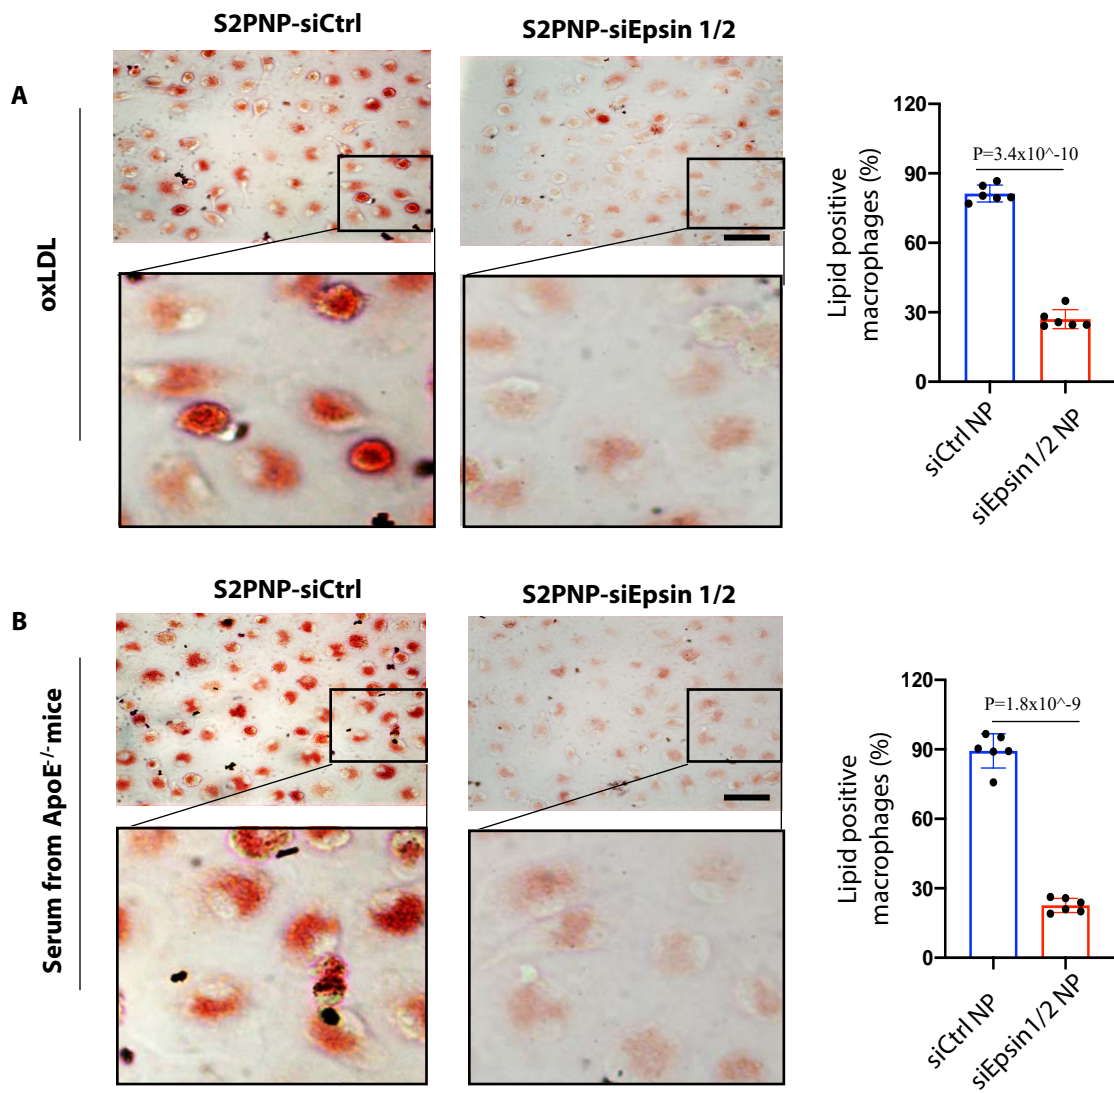

804  
 805

806 **Figure S18**  
807

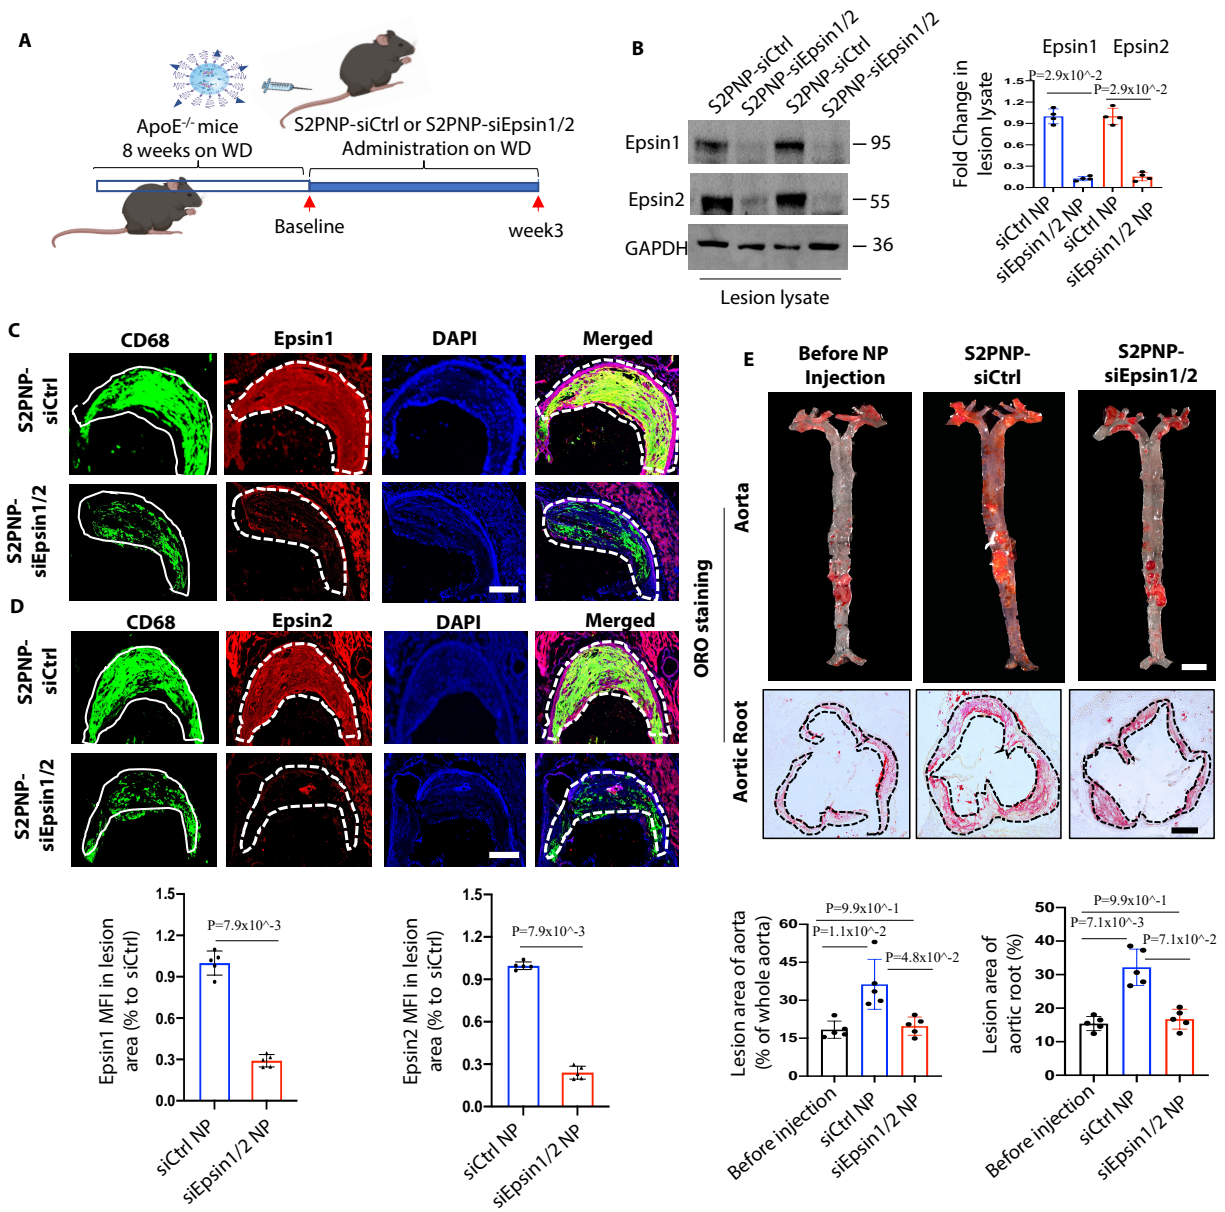

808  
809

810 **Figure S19**  
811

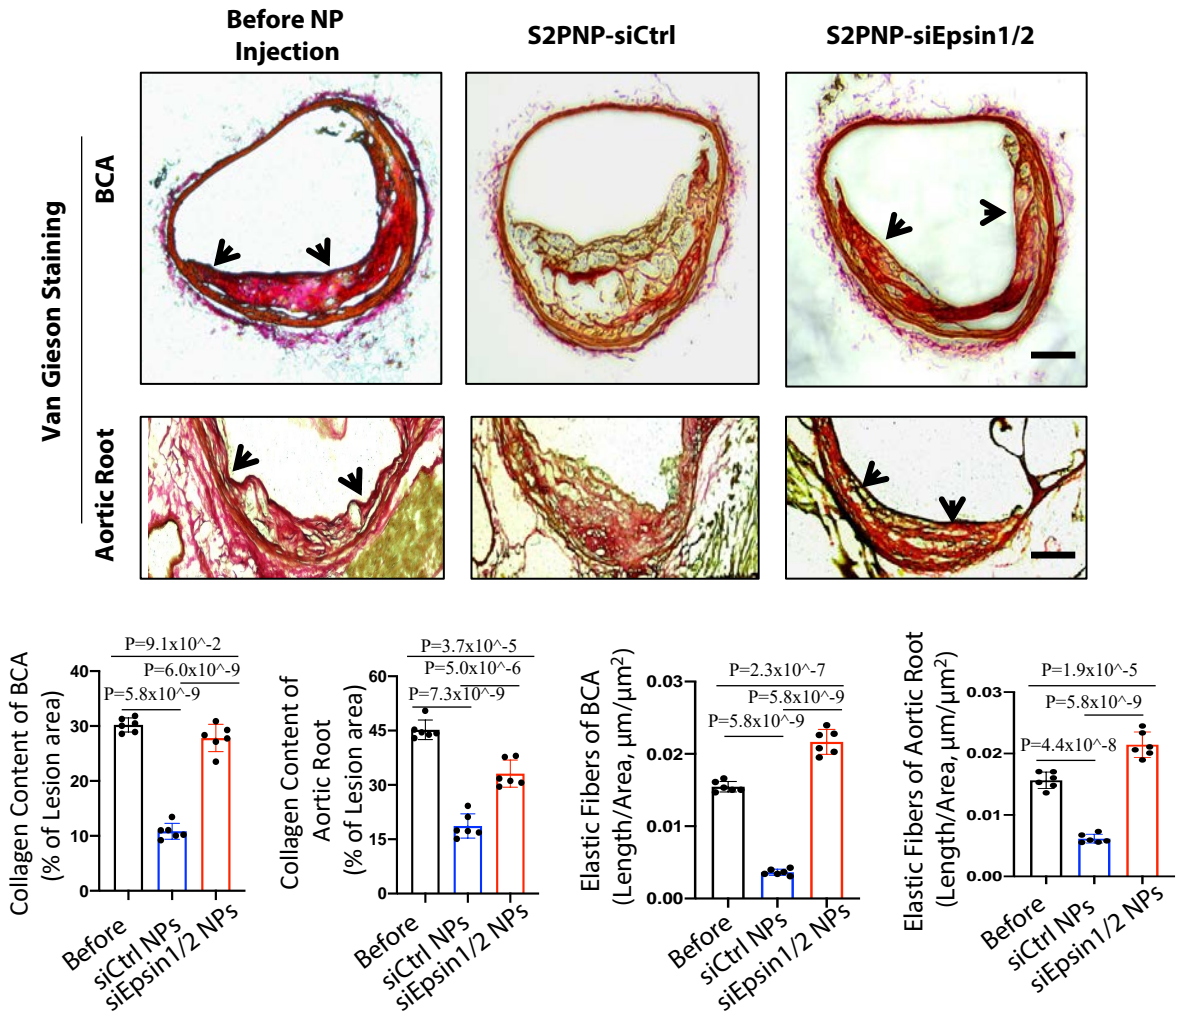

812  
813  
814  
815

**Figure S20**

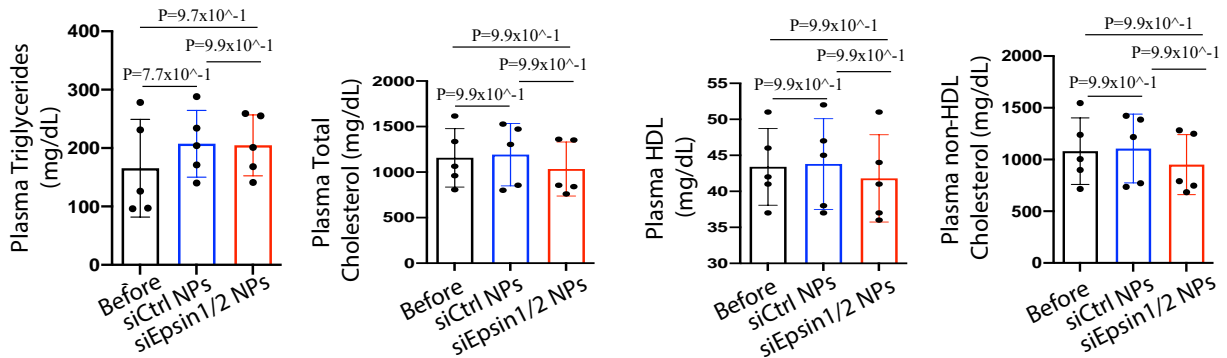

816  
817  
818

819 **Figure S21**  
820

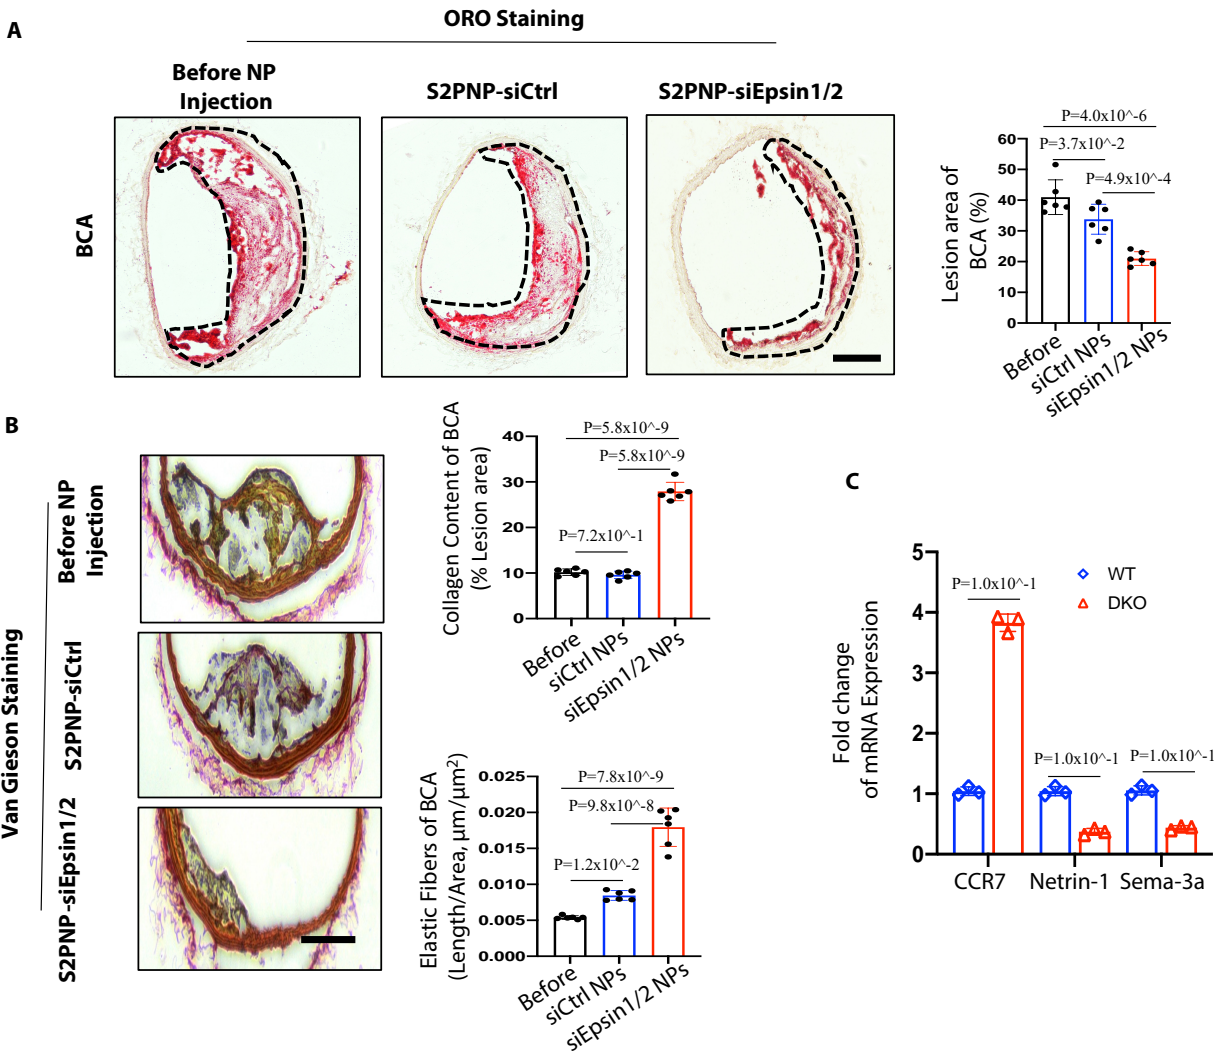

821

822 **Figure S22**  
 823  
 824

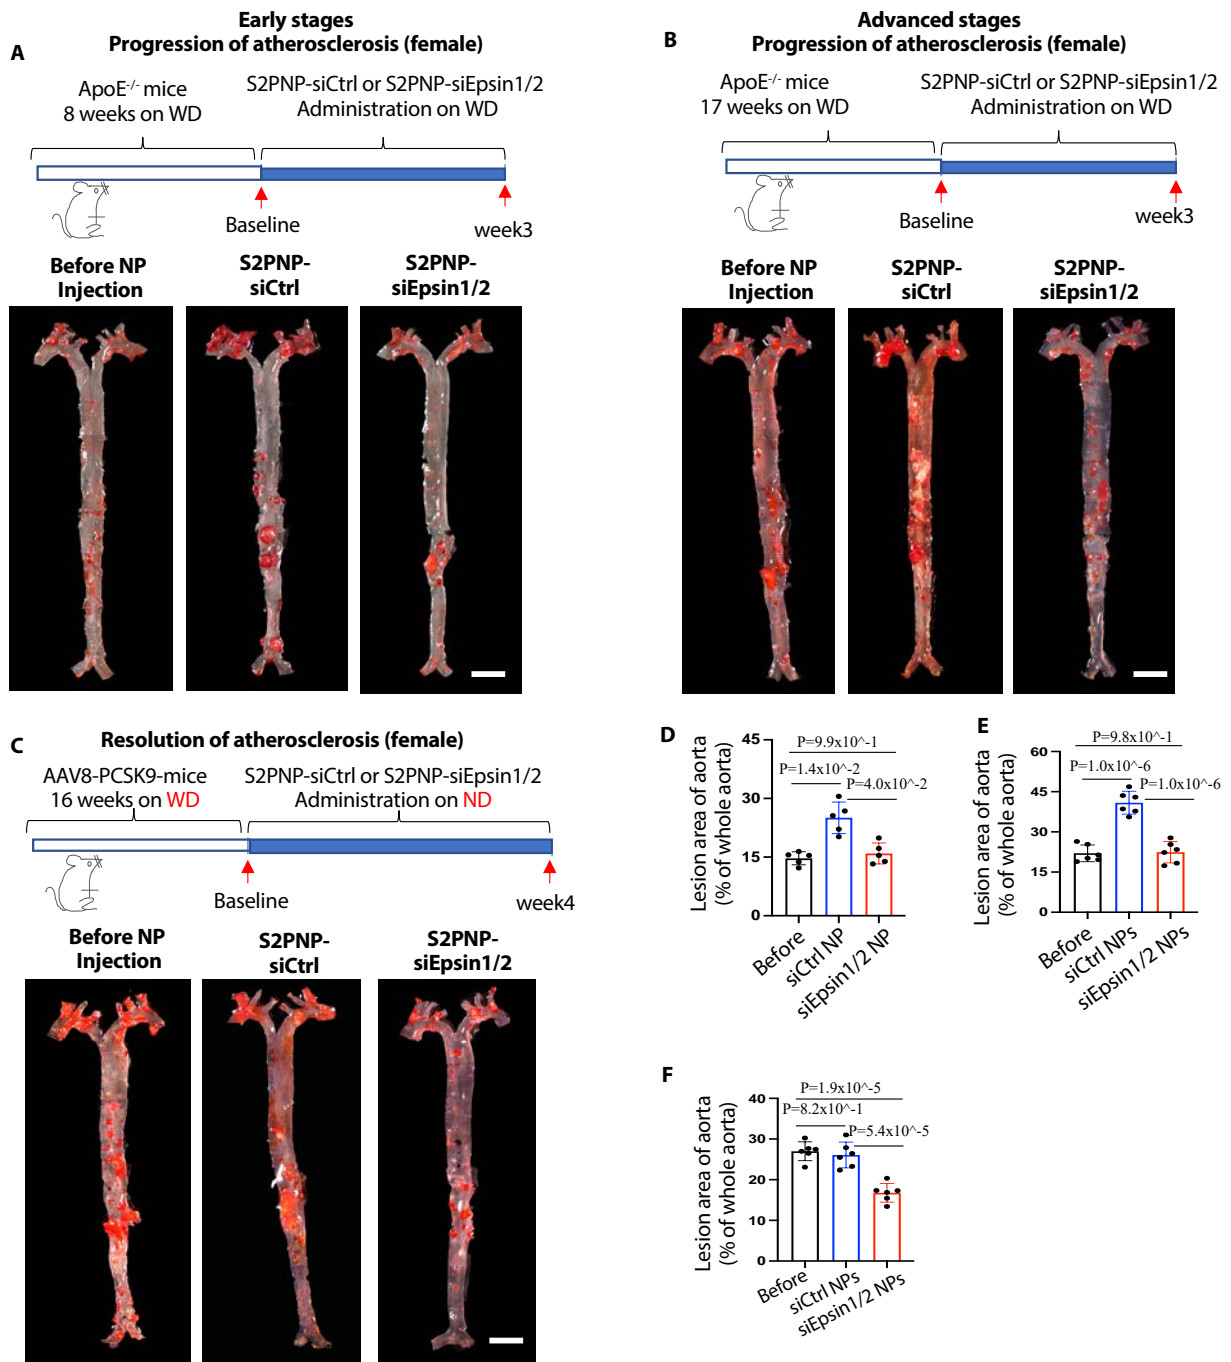

825  
 826  
 827



828 **Figure S23**  
 829  
 830

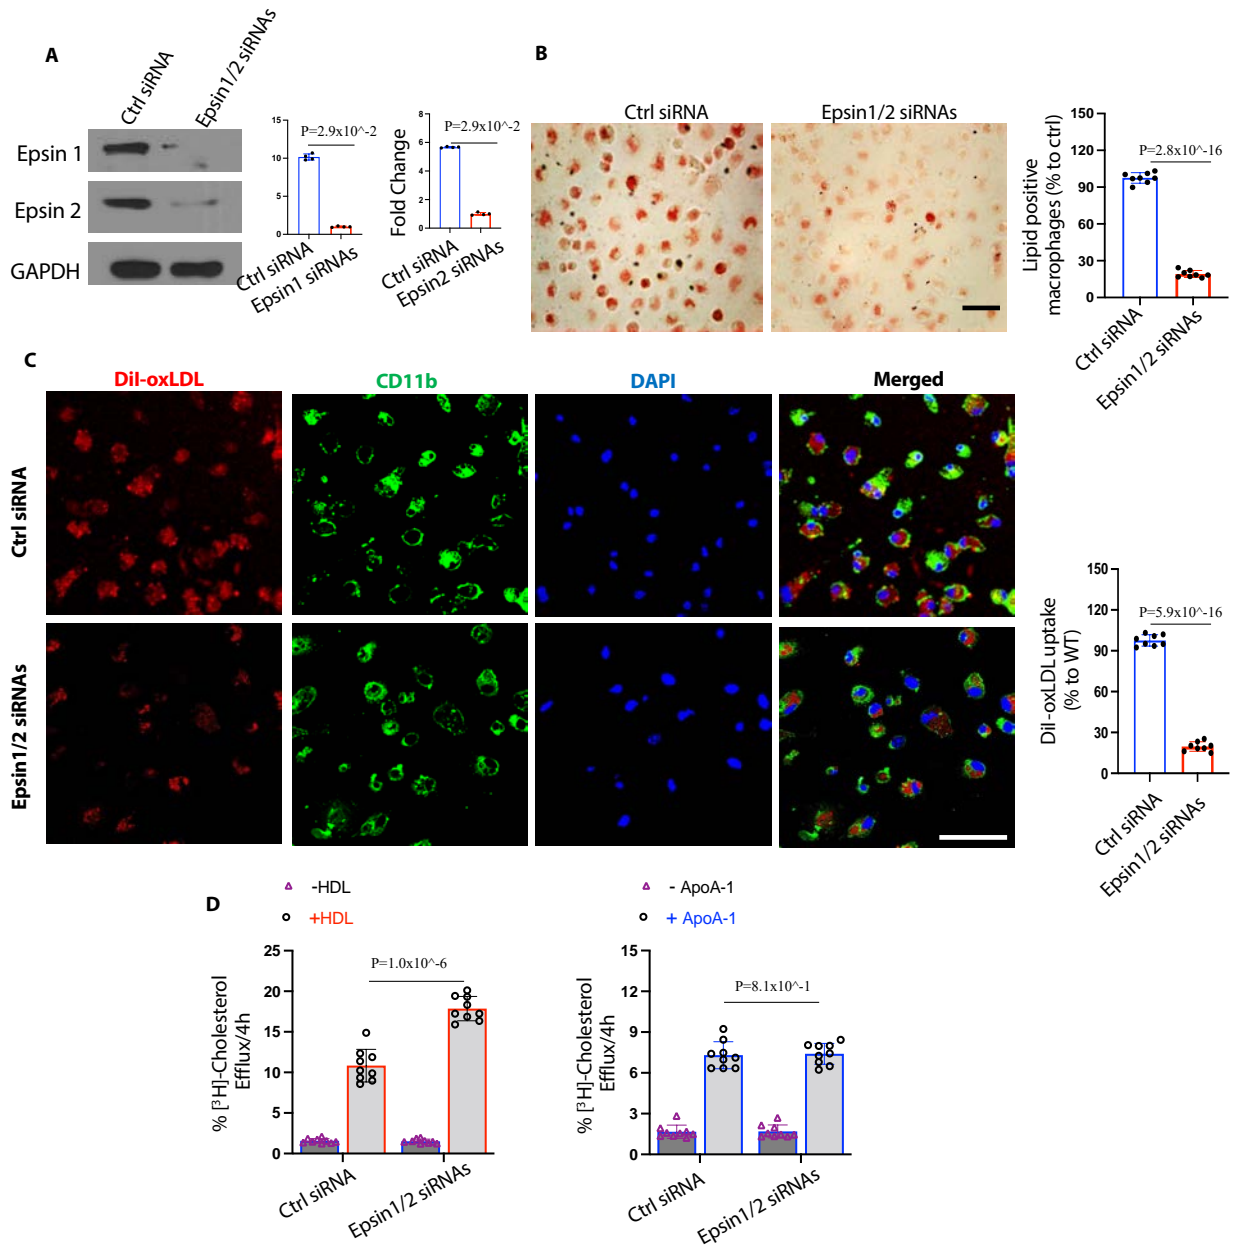

831  
 832

833 Figure S24  
834

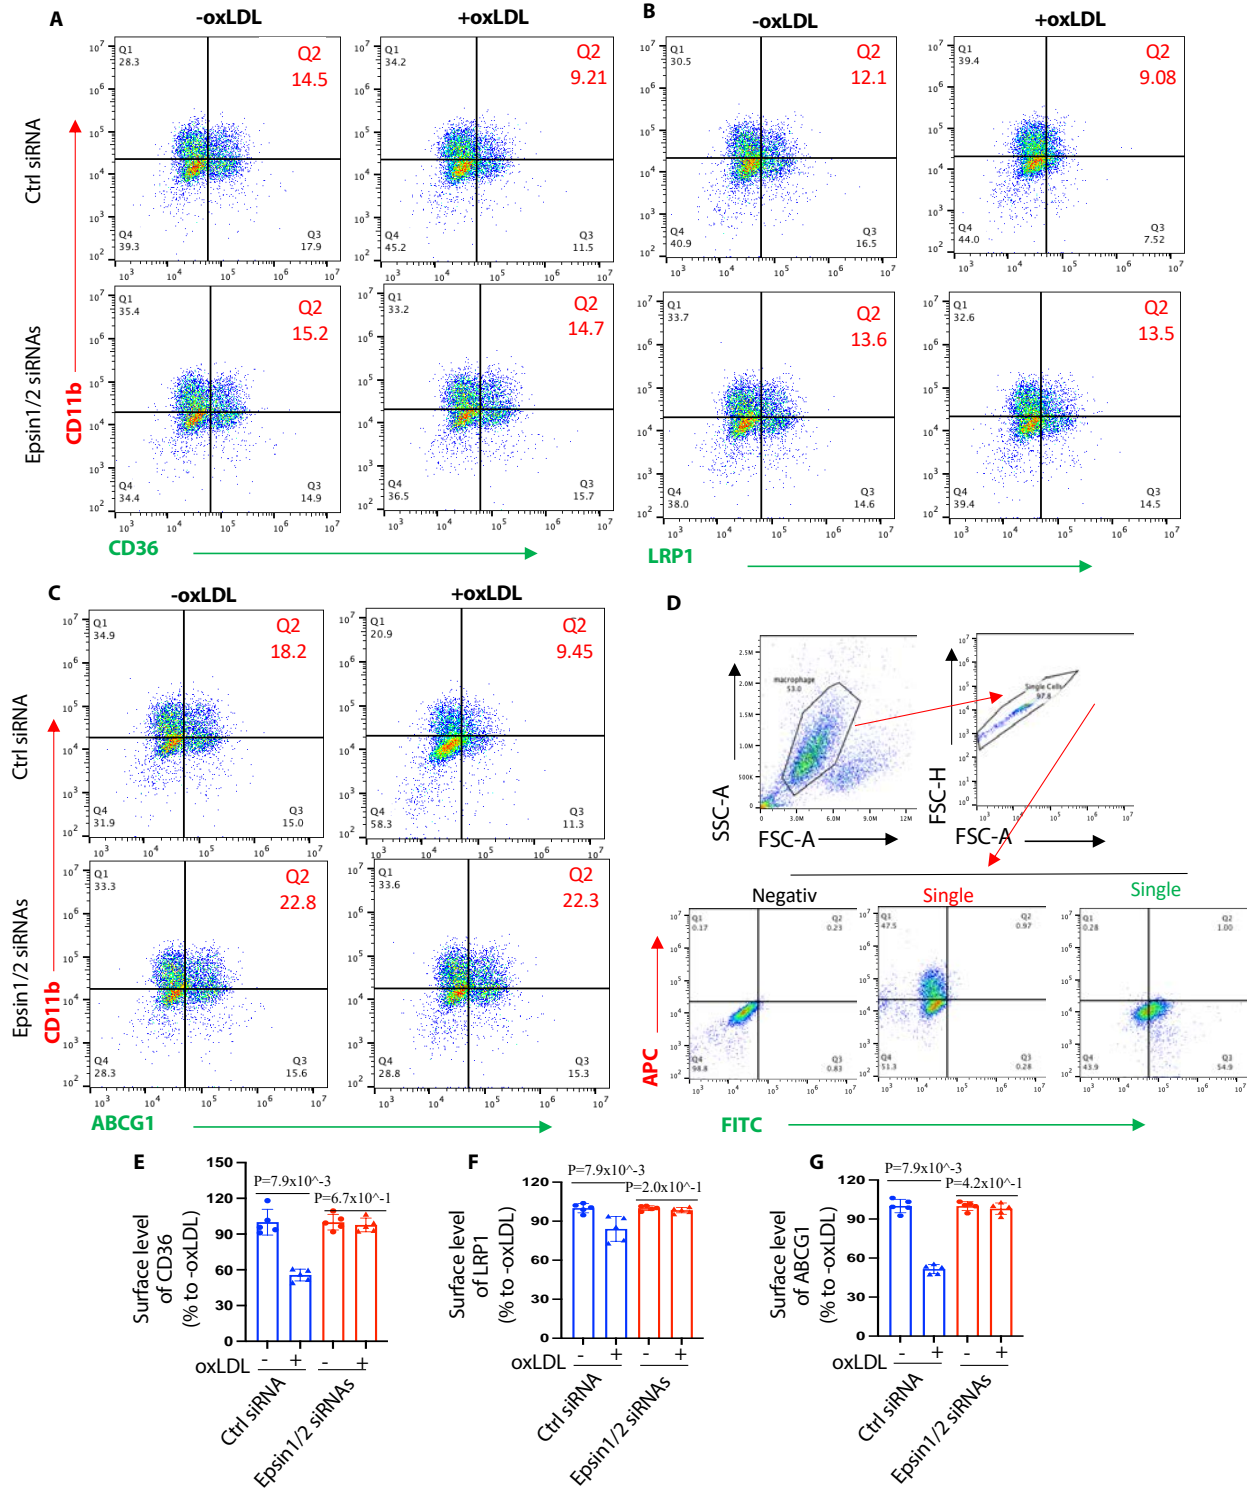

835  
836

837 **Figure S25**  
838

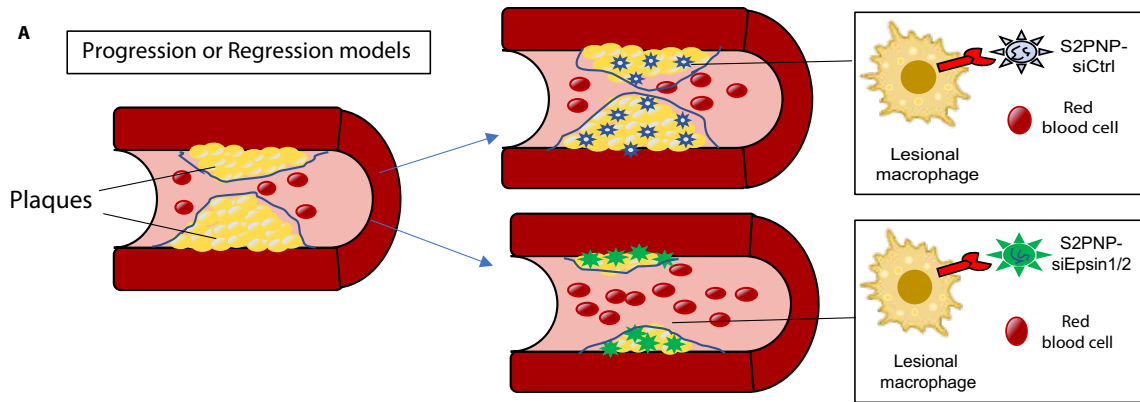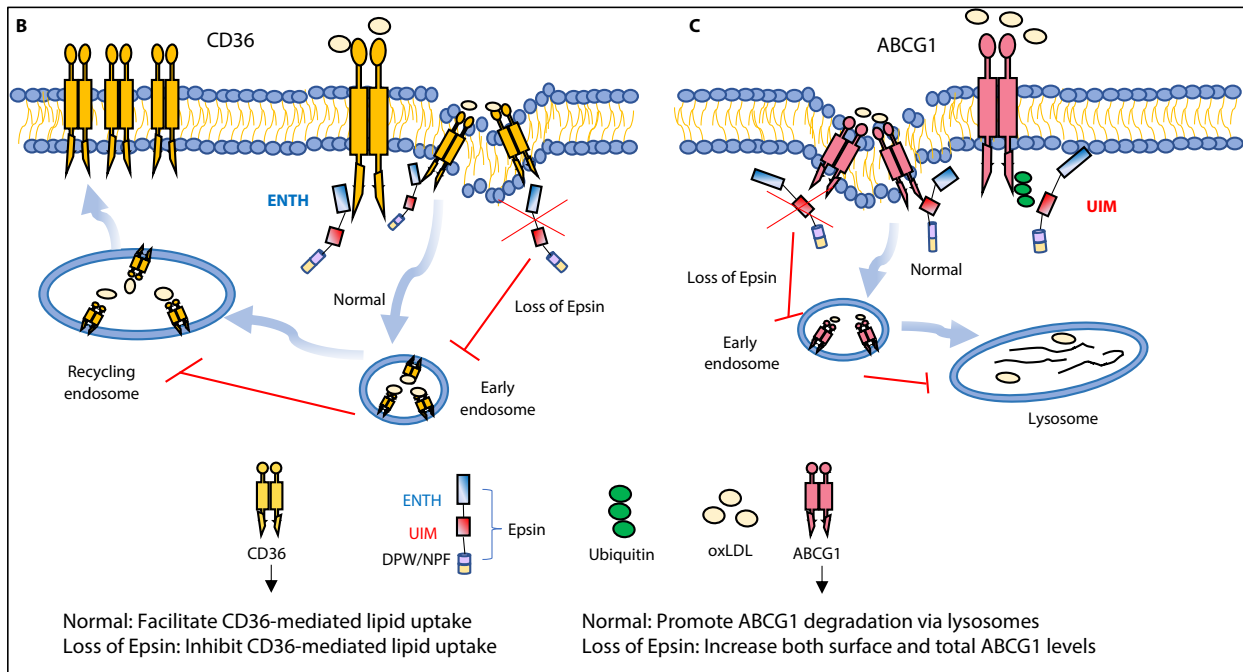

839  
840

841 **Table S1. Demographic Information of The Human Samples**

842

| Individual name | Gender | Tissue Source | Normal/ Diseased | Age   | Site of Primary Disease 1 | Specific Diagnosis 1 | Malignant /Benign | Disease Type                               |
|-----------------|--------|---------------|------------------|-------|---------------------------|----------------------|-------------------|--------------------------------------------|
| RA06-1040       | M      | Aorta         | Diseased         | 62-83 | Aorta                     | atherosclerosis      | Benign            | Atherosclerotic lesion                     |
| RA06-2816       | M      | Aorta         | Diseased         | 62-83 | Aorta                     | atherosclerosis      | Benign            | Atherosclerotic lesion                     |
| RA03-0422       | F      | Aorta         | Diseased         | 62-83 | Aorta                     | atherosclerosis      | Benign            | Atherosclerotic plaque with calcifications |
| RA02-0678       | M      | Aorta         | Diseased         | 62-83 | Aorta                     | atherosclerosis      | Benign            | Mild atherosclerotic change                |
| RA03-0488       | M      | Aorta         | Diseased         | 62-83 | Aorta                     | atherosclerosis      | Benign            | Thrombus and atherosclerotic plaque severe |
| RA03-0857       | F      | Aorta         | Diseased         | 62-84 | Aorta                     | atherosclerosis      | Benign            | Atherosclerosis with subintimal hemorrhage |
| RA03-1686       | M      | Aorta         | Normal           | <20   | Aorta                     | Dissection           | Benign            | N/A                                        |
| R14-0199        | M      | Aorta         | Normal           | 62-83 | Aorta                     | Dissection           | Benign            | N/A                                        |
| RA04-2408       | F      | Aorta         | Normal           | 62-83 | Heart                     | Degeneration         | Benign            | N/A                                        |

843

844

845

**Table S2. Statistical Table**

| Figure                  | Sample Size (n) | Parametric Analysis Type                              | P (or adjusted P) Value                 |
|-------------------------|-----------------|-------------------------------------------------------|-----------------------------------------|
| 2A WT VS DKO-CD36       | 5               | Unpaired non-parametric Mann-Whitney U test           | 5.5x10 <sup>-1</sup>                    |
| 2A WT VS DKO-Epsin1     | 5               | Unpaired non-parametric Mann-Whitney U test           | 7.9 x10 <sup>-3</sup>                   |
| 2A WT VS DKO-Epsin2     | 5               | Unpaired non-parametric Mann-Whitney U test           | 7.9 x10 <sup>-3</sup>                   |
| 2B WT VS DKO -oxLDL     | 4               | Unpaired non-parametric Mann-Whitney U test           | 9.9x10 <sup>-1</sup> (adjusted p value) |
| 2B WT VS DKO +oxLDL     | 4               | Unpaired non-parametric Mann-Whitney U test           | 2.0x10 <sup>-1</sup> (adjusted p value) |
| 2B -oxLDL VS +oxLDL WT  | 4               | Unpaired non-parametric Mann-Whitney U test           | 4.9x10 <sup>-1</sup> (adjusted p value) |
| 2B -oxLDL VS +oxLDL DKO | 4               | Unpaired non-parametric Mann-Whitney U test           | 4.9x10 <sup>-1</sup> (adjusted p value) |
| 2C WT VS DKO -oxLDL     | 4               | Unpaired non-parametric Mann-Whitney U test           | 8.9x10 <sup>-1</sup> (adjusted p value) |
| 2C WT VS DKO +oxLDL     | 4               | Unpaired non-parametric Mann-Whitney U test           | 2.9x10 <sup>-2</sup> (adjusted p value) |
| 2C -oxLDL VS +oxLDL WT  | 4               | Unpaired non-parametric Mann-Whitney U test           | 2.9x10 <sup>-2</sup> (adjusted p value) |
| 2C -oxLDL VS +oxLDL DKO | 4               | Unpaired non-parametric Mann-Whitney U test           | 9.9x10 <sup>-1</sup> (adjusted p value) |
| 2D WT VS DKO -oxLDL     | 8               | Two-way ANOVA Sidak post hoc multiple comparison test | 9.8x10 <sup>-1</sup> (adjusted p value) |

|                               |   |                                                       |                                          |
|-------------------------------|---|-------------------------------------------------------|------------------------------------------|
| 2D WT VS DKO +oxLDL           | 8 | Two-way ANOVA Sidak post hoc multiple comparison test | $3.1 \times 10^{-7}$ (adjusted p value)  |
| 2D -oxLDL VS +oxLDL WT        | 8 | Two-way ANOVA Sidak post hoc multiple comparison test | $3.1 \times 10^{-7}$ (adjusted p value)  |
| 2D -oxLDL VS +oxLDL DKO       | 8 | Two-way ANOVA Sidak post hoc multiple comparison test | $9.7 \times 10^{-1}$ (adjusted p value)  |
| 2E WT VS DKO -oxLDL           | 8 | Two-way ANOVA Sidak post hoc multiple comparison test | $9.9 \times 10^{-1}$ (adjusted p value)  |
| 2E WT VS DKO +oxLDL           | 8 | Two-way ANOVA Sidak post hoc multiple comparison test | $2.7 \times 10^{-7}$ (adjusted p value)  |
| 2E -oxLDL VS +oxLDL WT        | 8 | Two-way ANOVA Sidak post hoc multiple comparison test | $3.0 \times 10^{-7}$ (adjusted p value)  |
| 2E -oxLDL VS +oxLDL DKO       | 8 | Two-way ANOVA Sidak post hoc multiple comparison test | $9.9 \times 10^{-1}$ (adjusted p value)  |
| 2F WT vs DKO                  | 6 | Unpaired t test                                       | $4.9 \times 10^{-8}$ (adjusted p value)  |
| 2G Cho WT VS DKO -oxLDL       | 6 | Two-way ANOVA Sidak post hoc multiple comparison test | $9.9 \times 10^{-1}$ (adjusted p value)  |
| 2G Cho WT VS DKO +oxLDL       | 6 | Two-way ANOVA Sidak post hoc multiple comparison test | $8.0 \times 10^{-6}$ (adjusted p value)  |
| 2G Cho -oxLDL VS +oxLDL WT    | 6 | Two-way ANOVA Sidak post hoc multiple comparison test | $3.8 \times 10^{-7}$ (adjusted p value)  |
| 2G Cho -oxLDL VS +oxLDL DKO   | 6 | Two-way ANOVA Sidak post hoc multiple comparison test | $1.0 \times 10^{-2}$ (adjusted p value)  |
| 2G TG WT VS DKO -oxLDL        | 6 | Two-way ANOVA Sidak post hoc multiple comparison test | $9.8 \times 10^{-1}$ (adjusted p value)  |
| 2G TG WT VS DKO +oxLDL        | 6 | Two-way ANOVA Sidak post hoc multiple comparison test | $1.2 \times 10^{-5}$ (adjusted p value)  |
| 2G TG -oxLDL VS +oxLDL WT     | 6 | Two-way ANOVA Sidak post hoc multiple comparison test | $3.0 \times 10^{-6}$ (adjusted p value)  |
| 2G TG -oxLDL VS +oxLDL DKO    | 6 | Two-way ANOVA Sidak post hoc multiple comparison test | $9.7 \times 10^{-1}$ (adjusted p value)  |
| 2H WT vs DKO                  | 6 | Unpaired t test                                       | $3.9 \times 10^{-12}$                    |
| 3A WT vs DKO                  | 4 | Unpaired non-parametric Mann-Whitney U test           | $2.9 \times 10^{-2}$                     |
| 3B WT Vector vs WT            | 4 | Kruskal-Wallis Dunn's multiple comparison test        | $1.1 \times 10^{-2}$ (adjusted p value)  |
| 3B WT Vector vs $\Delta$ UIM  | 4 | Kruskal-Wallis Dunn's multiple comparison test        | $2.6 \times 10^{-1}$ (adjusted p value)  |
| 3B WT Vector vs $\Delta$ ENTH | 4 | Kruskal-Wallis Dunn's multiple comparison test        | $9.9 \times 10^{-1}$ (adjusted p value)  |
| 3E WT Vector vs WT            | 6 | One way ANOVA Tukey's multiple comparison test        | $9.9 \times 10^{-1}$ (adjusted p value)  |
| 3E WT Vector vs $\Delta$ UIM  | 6 | One way ANOVA Tukey's multiple comparison test        | $4.4 \times 10^{-1}$ (adjusted p value)  |
| 3E WT Vector vs $\Delta$ ENTH | 6 | One way ANOVA Tukey's multiple comparison test        | $9.8 \times 10^{-1}$ (adjusted p value)  |
| 3E DKO Vector vs WT           | 6 | One way ANOVA Tukey's multiple comparison test        | $8.9 \times 10^{-13}$ (adjusted p value) |

|                                |   |                                                |                                          |
|--------------------------------|---|------------------------------------------------|------------------------------------------|
| 3E DKO Vector vs $\Delta$ UIM  | 6 | One way ANOVA Tukey's multiple comparison test | $9.1 \times 10^{-13}$ (adjusted p value) |
| 3E DKO Vector vs $\Delta$ ENTH | 6 | One way ANOVA Tukey's multiple comparison test | $9.9 \times 10^{-1}$ (adjusted p value)  |
| 5A WT vs DKO                   | 9 | One way ANOVA Tukey's multiple comparison test | $6.1 \times 10^{-9}$ (adjusted p value)  |
| 5A WT vs DKO/ABCG1 fl/+        | 9 | One way ANOVA Tukey's multiple comparison test | $8.9 \times 10^{-3}$ (adjusted p value)  |
| 5A DKO vs DKO/ABCG1 fl/+       | 9 | One way ANOVA Tukey's multiple comparison test | $1.0 \times 10^{-6}$ (adjusted p value)  |
| 5B WT vs DKO                   | 9 | One way ANOVA Tukey's multiple comparison test | $4.3 \times 10^{-1}$ (adjusted p value)  |
| 5B WT vs DKO/ABCG1 fl/+        | 9 | One way ANOVA Tukey's multiple comparison test | $7.6 \times 10^{-1}$ (adjusted p value)  |
| 5B DKO vs DKO/ABCG1 fl/+       | 9 | One way ANOVA Tukey's multiple comparison test | $8.5 \times 10^{-1}$ (adjusted p value)  |
| 5D WT vs DKO                   | 6 | One way ANOVA Tukey's multiple comparison test | $1.0 \times 10^{-6}$ (adjusted p value)  |
| 5D WT vs DKO/ABCG1 fl/+        | 6 | One way ANOVA Tukey's multiple comparison test | $9.3 \times 10^{-1}$ (adjusted p value)  |
| 5D DKO vs DKO/ABCG1 fl/+       | 6 | One way ANOVA Tukey's multiple comparison test | $2.0 \times 10^{-6}$ (adjusted p value)  |
| 5E WT vs DKO                   | 6 | One way ANOVA Tukey's multiple comparison test | $2.0 \times 10^{-6}$ (adjusted p value)  |
| 5E WT vs DKO/ABCG1 fl/+        | 6 | One way ANOVA Tukey's multiple comparison test | $7.1 \times 10^{-1}$ (adjusted p value)  |
| 5E DKO vs DKO/ABCG1 fl/+       | 6 | One way ANOVA Tukey's multiple comparison test | $8.0 \times 10^{-6}$ (adjusted p value)  |
| 5F WT vs DKO                   | 6 | One way ANOVA Tukey's multiple comparison test | $2.2 \times 10^{-3}$ (adjusted p value)  |
| 5F WT vs DKO/ABCG1 fl/+        | 6 | One way ANOVA Tukey's multiple comparison test | $9.5 \times 10^{-1}$ (adjusted p value)  |
| 5F DKO vs DKO/ABCG1 fl/+       | 6 | One way ANOVA Tukey's multiple comparison test | $4.1 \times 10^{-3}$ (adjusted p value)  |
| 5G WT vs DKO                   | 6 | One way ANOVA Tukey's multiple comparison test | $2.5 \times 10^{-5}$ (adjusted p value)  |
| 5G WT vs DKO/ABCG1 fl/+        | 6 | One way ANOVA Tukey's multiple comparison test | $9.9 \times 10^{-1}$ (adjusted p value)  |
| 5G DKO vs DKO/ABCG1 fl/+       | 6 | One way ANOVA Tukey's multiple comparison test | $2.6 \times 10^{-5}$ (adjusted p value)  |
| 5H WT vs DKO                   | 6 | One way ANOVA Tukey's multiple comparison test | $8.6 \times 10^{-5}$ (adjusted p value)  |
| 5H WT vs DKO/ABCG1 fl/+        | 6 | One way ANOVA Tukey's multiple comparison test | $9.9 \times 10^{-1}$ (adjusted p value)  |
| 5H DKO vs DKO/ABCG1 fl/+       | 6 | One way ANOVA Tukey's multiple comparison test | $9.6 \times 10^{-5}$ (adjusted p value)  |
| 5I WT vs DKO                   | 6 | One way ANOVA Tukey's multiple comparison test | $1.4 \times 10^{-5}$ (adjusted p value)  |
| 5I WT vs DKO/ABCG1 fl/+        | 6 | One way ANOVA Tukey's multiple comparison test | $5.4 \times 10^{-1}$ (adjusted p value)  |

|                                      |   |                                                       |                                          |
|--------------------------------------|---|-------------------------------------------------------|------------------------------------------|
| 5I DKO vs DKO/ABCG1 fl/+             | 6 | One way ANOVA Tukey's multiple comparison test        | 9.0 x10 <sup>-5</sup> (adjusted p value) |
| 5K WT vs DKO                         | 3 | Kruskal-Wallis Dunn's multiple comparison test        | 9.9 x10 <sup>-1</sup> (adjusted p value) |
| 5K WT vs DKO/ABCG1 fl/+              | 3 | Kruskal-Wallis Dunn's multiple comparison test        | 1.6 x10 <sup>-1</sup> (adjusted p value) |
| 5K DKO vs DKO/ABCG1 fl/+             | 3 | Kruskal-Wallis Dunn's multiple comparison test        | 1.1 x10 <sup>-1</sup> (adjusted p value) |
| 5L WT vs DKO                         | 3 | Kruskal-Wallis Dunn's multiple comparison test        | 2.2 x10 <sup>-2</sup> (adjusted p value) |
| 5L WT vs DKO/ABCG1 fl/+              | 3 | Kruskal-Wallis Dunn's multiple comparison test        | 5.4 x10 <sup>-1</sup> (adjusted p value) |
| 5L DKO vs DKO/ABCG1 fl/+             | 3 | Kruskal-Wallis Dunn's multiple comparison test        | 5.4 x10 <sup>-1</sup> (adjusted p value) |
| 6A ABCG1 WT vs DKO                   | 4 | Unpaired non-parametric Mann-Whitney U test           | 2.9 x10 <sup>-2</sup>                    |
| 6A ABCA1 WT vs DKO                   | 4 | Unpaired non-parametric Mann-Whitney U test           | 6.9 x10 <sup>-1</sup>                    |
| 6A SR-A1 WT vs DKO                   | 4 | Unpaired non-parametric Mann-Whitney U test           | 6.9 x10 <sup>-1</sup>                    |
| 6A LDLR WT vs DKO                    | 4 | Unpaired non-parametric Mann-Whitney U test           | 6.9 x10 <sup>-1</sup>                    |
| 6B ABCG1 WT vs DKO pull              | 4 | Unpaired non-parametric Mann-Whitney U test           | 2.9 x10 <sup>-2</sup>                    |
| 6C (S14B) WT -oxLDL vs +oxLDL 5min   | 3 | Kruskal-Wallis Dunn's multiple comparison test        | 9.2 x10 <sup>-1</sup> (adjusted p value) |
| 6C (S14B) WT -oxLDL vs +oxLDL 15min  | 3 | Kruskal-Wallis Dunn's multiple comparison test        | 1.2 x10 <sup>-1</sup> (adjusted p value) |
| 6C (S14B) WT -oxLDL vs +oxLDL 45min  | 3 | Kruskal-Wallis Dunn's multiple comparison test        | 6.7 x10 <sup>-3</sup> (adjusted p value) |
| 6C (S14B) DKO -oxLDL vs +oxLDL 5min  | 3 | Kruskal-Wallis Dunn's multiple comparison test        | 3.4 x10 <sup>-1</sup> (adjusted p value) |
| 6C (S14B) DKO -oxLDL vs +oxLDL 15min | 3 | Kruskal-Wallis Dunn's multiple comparison test        | 9.2 x10 <sup>-1</sup> (adjusted p value) |
| 6C (S14B) DKO -oxLDL vs +oxLDL 45min | 3 | Kruskal-Wallis Dunn's multiple comparison test        | 9.9 x10 <sup>-1</sup> (adjusted p value) |
| 6D WT vs DKO IP                      | 4 | Unpaired non-parametric Mann-Whitney U test           | 2.9 x10 <sup>-2</sup>                    |
| 6E Vector vs WT                      | 4 | Kruskal-Wallis Dunn's multiple comparison test        | 7.0 x10 <sup>-3</sup> (adjusted p value) |
| 6E Vector vs ΔENTH                   | 4 | Kruskal-Wallis Dunn's multiple comparison test        | 1.9 x10 <sup>-1</sup> (adjusted p value) |
| 6E Vector vs ΔUIM                    | 4 | Kruskal-Wallis Dunn's multiple comparison test        | 9.9 x10 <sup>-1</sup> (adjusted p value) |
| 6F -oxLDL-MG132 vs -oxLDL+MG132      | 3 | Kruskal-Wallis Dunn's multiple comparison test        | 9.2 x10 <sup>-1</sup> (adjusted p value) |
| 6F -oxLDL-MG132 vs +oxLDL-MG132      | 3 | Kruskal-Wallis Dunn's multiple comparison test        | 1.2 x10 <sup>-1</sup> (adjusted p value) |
| 6F -oxLDL-MG132 vs +oxLDL+MG132      | 3 | Kruskal-Wallis Dunn's multiple comparison test        | 6.7 x10 <sup>-3</sup> (adjusted p value) |
| 6G -oxLDL VS +oxLDL WT               | 8 | Two-way ANOVA Sidak post hoc multiple comparison test | 6.0x10 <sup>-12</sup> (adjusted p value) |

|                                     |   |                                                       |                                           |
|-------------------------------------|---|-------------------------------------------------------|-------------------------------------------|
| 6G -oxLDL VS +oxLDL DKO             | 8 | Two-way ANOVA Sidak post hoc multiple comparison test | 9.9 x10 <sup>-1</sup> (adjusted p value)  |
| 6G WT VS DKO -oxLDL                 | 8 | Two-way ANOVA Sidak post hoc multiple comparison test | 9.0 x10 <sup>-1</sup> (adjusted p value)  |
| 6G WT VS DKO +oxLDL                 | 8 | Two-way ANOVA Sidak post hoc multiple comparison test | 1.4x10 <sup>-11</sup> (adjusted p value)  |
| 6H -oxLDL VS +oxLDL WT              | 8 | Two-way ANOVA Sidak post hoc multiple comparison test | 7.9 x10 <sup>-13</sup> (adjusted p value) |
| 6H -oxLDL VS +oxLDL DKO             | 8 | Two-way ANOVA Sidak post hoc multiple comparison test | 8.2x10 <sup>-1</sup> (adjusted p value)   |
| 6H WT VS DKO -oxLDL                 | 8 | Two-way ANOVA Sidak post hoc multiple comparison test | 9.7x10 <sup>-1</sup> (adjusted p value)   |
| 6H WT VS DKO +oxLDL                 | 8 | Two-way ANOVA Sidak post hoc multiple comparison test | 7.9x10 <sup>-13</sup> (adjusted p value)  |
| 7B Lesion before vs siCtrl NP       | 6 | One way ANOVA Tukey's multiple comparison test        | 5.9x10 <sup>-9</sup> (adjusted p value)   |
| 7B before vs siEpsin1/2 NP          | 6 | One way ANOVA Tukey's multiple comparison test        | 1.4x10 <sup>-1</sup> (adjusted p value)   |
| 7B siCtrl NP vs siEpsin1/2 NP       | 6 | One way ANOVA Tukey's multiple comparison test        | 6.5x10 <sup>-9</sup> (adjusted p value)   |
| 7C BCA before vs siCtrl NP          | 6 | One way ANOVA Tukey's multiple comparison test        | 2.0x10 <sup>-6</sup> (adjusted p value)   |
| 7C BCA before vs siEpsin1/2 NP      | 6 | One way ANOVA Tukey's multiple comparison test        | 8.8x10 <sup>-1</sup> (adjusted p value)   |
| 7C BCA siCtrl NP vs siEpsin1/2 NP   | 6 | One way ANOVA Tukey's multiple comparison test        | 3.0x10 <sup>-6</sup> (adjusted p value)   |
| 7C Root before vs siCtrl NP         | 6 | One way ANOVA Tukey's multiple comparison test        | 2.9x10 <sup>-8</sup> (adjusted p value)   |
| 7C Root before vs siEpsin1/2 NP     | 6 | One way ANOVA Tukey's multiple comparison test        | 2.0x10 <sup>-1</sup> (adjusted p value)   |
| 7C Root siCtrl NP vs siEpsin1/2 NP  | 6 | One way ANOVA Tukey's multiple comparison test        | 2.4x10 <sup>-7</sup> (adjusted p value)   |
| 7D CD68 before vs siCtrl NP         | 6 | One way ANOVA Tukey's multiple comparison test        | 6.0x10 <sup>-9</sup> (adjusted p value)   |
| 7D CD68 before vs siEpsin1/2 NP     | 6 | One way ANOVA Tukey's multiple comparison test        | 5.7x10 <sup>-1</sup> (adjusted p value)   |
| 7D CD68 siCtrl NP vs siEpsin1/2 NP  | 6 | One way ANOVA Tukey's multiple comparison test        | 6.0x10 <sup>-9</sup> (adjusted p value)   |
| 7D a-SMA before vs siCtrl NP        | 6 | One way ANOVA Tukey's multiple comparison test        | 1.0x10 <sup>-6</sup> (adjusted p value)   |
| 7D a-SMA before vs siEpsin1/2 NP    | 6 | One way ANOVA Tukey's multiple comparison test        | 1.5x10 <sup>-7</sup> (adjusted p value)   |
| 7D a-SMA siCtrl NP vs siEpsin1/2 NP | 6 | One way ANOVA Tukey's multiple comparison test        | 5.8x10 <sup>-9</sup> (adjusted p value)   |
| 7E BCA before vs siCtrl NP          | 6 | One way ANOVA Tukey's multiple comparison test        | 5.8x10 <sup>-9</sup> (adjusted p value)   |
| 7E BCA before vs siEpsin1/2 NP      | 6 | One way ANOVA Tukey's multiple comparison test        | 5.0x10 <sup>-1</sup> (adjusted p value)   |
| 7E BCA siCtrl NP vs siEpsin1/2 NP   | 6 | One way ANOVA Tukey's multiple comparison test        | 5.8x10 <sup>-9</sup> (adjusted p value)   |



|                                     |   |                                                |                                         |
|-------------------------------------|---|------------------------------------------------|-----------------------------------------|
| 7E Root before vs siCtrl NP         | 6 | One way ANOVA Tukey's multiple comparison test | $5.8 \times 10^{-9}$ (adjusted p value) |
| 7E Root before vs siEpsin1/2 NP     | 6 | One way ANOVA Tukey's multiple comparison test | $7.3 \times 10^{-1}$ (adjusted p value) |
| 7E Root siCtrl NP vs siEpsin1/2 NP  | 6 | One way ANOVA Tukey's multiple comparison test | $5.8 \times 10^{-9}$ (adjusted p value) |
| 8D Aorta before vs siCtrl NP        | 6 | One way ANOVA Tukey's multiple comparison test | $3.3 \times 10^{-1}$ (adjusted p value) |
| 8D Aorta before vs siEpsin1/2 NP    | 6 | One way ANOVA Tukey's multiple comparison test | $1.0 \times 10^{-6}$ (adjusted p value) |
| 8D Aorta siCtrl NP vs siEpsin1/2 NP | 6 | One way ANOVA Tukey's multiple comparison test | $1.2 \times 10^{-5}$ (adjusted p value) |
| 8D Root before vs siCtrl NP         | 6 | One way ANOVA Tukey's multiple comparison test | $3.8 \times 10^{-1}$ (adjusted p value) |
| 8D Root before vs siEpsin1/2 NP     | 6 | One way ANOVA Tukey's multiple comparison test | $2.9 \times 10^{-4}$ (adjusted p value) |
| 8D Root siCtrl NP vs siEpsin1/2 NP  | 6 | One way ANOVA Tukey's multiple comparison test | $4.3 \times 10^{-3}$ (adjusted p value) |
| 8D CD68 before vs siCtrl NP         | 6 | One way ANOVA Tukey's multiple comparison test | $7.5 \times 10^{-2}$ (adjusted p value) |
| 8D CD68 before vs siEpsin1/2 NP     | 6 | One way ANOVA Tukey's multiple comparison test | $1.1 \times 10^{-7}$ (adjusted p value) |
| 8D CD68 siCtrl NP vs siEpsin1/2 NP  | 6 | One way ANOVA Tukey's multiple comparison test | $3.0 \times 10^{-6}$ (adjusted p value) |
| 8D a-SMA before vs siCtrl NP        | 6 | One way ANOVA Tukey's multiple comparison test | $7.1 \times 10^{-5}$ (adjusted p value) |
| 8D a-SMA before vs siEpsin1/2 NP    | 6 | One way ANOVA Tukey's multiple comparison test | $5.8 \times 10^{-9}$ (adjusted p value) |
| 8D a-SMA siCtrl NP vs siEpsin1/2 NP | 6 | One way ANOVA Tukey's multiple comparison test | $5.8 \times 10^{-9}$ (adjusted p value) |
| 8I VCAM-1                           | 6 | Unpaired t test                                | $1.6 \times 10^{-8}$ (adjusted p value) |
| 8I ICAM-1                           | 6 | Unpaired t test                                | $6.5 \times 10^{-9}$ (adjusted p value) |
| 8I P-selectin                       | 6 | Unpaired t test                                | $9.4 \times 10^{-8}$ (adjusted p value) |
| 8I E-selectin                       | 6 | Unpaired t test                                | $2.1 \times 10^{-8}$ (adjusted p value) |
| 8J IL-6                             | 4 | Unpaired non-parametric Mann-Whitney U test    | $2.9 \times 10^{-2}$ (adjusted p value) |
| 8J IL-1b                            | 4 | Unpaired non-parametric Mann-Whitney U test    | $2.9 \times 10^{-2}$ (adjusted p value) |
| 8J TNF-a                            | 4 | Unpaired non-parametric Mann-Whitney U test    | $2.9 \times 10^{-2}$ (adjusted p value) |
| 8J MCP1                             | 4 | Unpaired non-parametric Mann-Whitney U test    | $8.9 \times 10^{-1}$ (adjusted p value) |
| 8J iNOS                             | 4 | Unpaired non-parametric Mann-Whitney U test    | $2.9 \times 10^{-2}$ (adjusted p value) |
| 8J IL-10                            | 4 | Unpaired non-parametric Mann-Whitney U test    | $2.9 \times 10^{-2}$ (adjusted p value) |

|                                       |   |                                                |                                          |
|---------------------------------------|---|------------------------------------------------|------------------------------------------|
| 8J Arg-1                              | 4 | Unpaired non-parametric Mann-Whitney U test    | $2.9 \times 10^{-2}$ (adjusted p value)  |
| 8J Epsin1                             | 4 | Unpaired non-parametric Mann-Whitney U test    | $2.9 \times 10^{-2}$ (adjusted p value)  |
| 8J Epsin-2                            | 4 | Unpaired non-parametric Mann-Whitney U test    | $2.9 \times 10^{-2}$ (adjusted p value)  |
| S9A                                   | 6 | Unpaired t test                                | $7.0 \times 10^{-11}$ (adjusted p value) |
| S9B                                   | 6 | Unpaired t test                                | $7.0 \times 10^{-11}$ (adjusted p value) |
| S13-ABCG1                             | 5 | Unpaired non-parametric Mann-Whitney U test    | $6.9 \times 10^{-1}$ (adjusted p value)  |
| S13-Epsin1                            | 5 | Unpaired non-parametric Mann-Whitney U test    | $7.9 \times 10^{-3}$ (adjusted p value)  |
| S13-Epsin2                            | 5 | Unpaired non-parametric Mann-Whitney U test    | $7.9 \times 10^{-3}$ (adjusted p value)  |
| S15A-CD68                             | 6 | Unpaired t test                                | $8.8 \times 10^{-7}$ (adjusted p value)  |
| S15A-ABCG1                            | 6 | Unpaired t test                                | $2.0 \times 10^{-6}$ (adjusted p value)  |
| S15B-CD68                             | 6 | Unpaired t test                                | $3.0 \times 10^{-6}$ (adjusted p value)  |
| S15-ABCG1                             | 6 | Unpaired t test                                | $1.5 \times 10^{-7}$ (adjusted p value)  |
| S16B Epsin1                           | 3 | Unpaired non-parametric Mann-Whitney U test    | $1.0 \times 10^{-1}$ (adjusted p value)  |
| S16B Epsin2                           | 3 | Unpaired non-parametric Mann-Whitney U test    | $1.0 \times 10^{-1}$ (adjusted p value)  |
| S16C Epsin1                           | 3 | Unpaired non-parametric Mann-Whitney U test    | $1.0 \times 10^{-1}$ (adjusted p value)  |
| S16C Epsin2                           | 3 | Unpaired non-parametric Mann-Whitney U test    | $1.0 \times 10^{-1}$ (adjusted p value)  |
| S17A                                  | 6 | Unpaired t test                                | $3.4 \times 10^{-10}$ (adjusted p value) |
| S17B                                  | 6 | Unpaired t test                                | $1.8 \times 10^{-9}$ (adjusted p value)  |
| S18B Epsin1                           | 4 | Unpaired non-parametric Mann-Whitney U test    | $2.9 \times 10^{-2}$ (adjusted p value)  |
| S18B Epsin2                           | 4 | Unpaired non-parametric Mann-Whitney U test    | $2.9 \times 10^{-2}$ (adjusted p value)  |
| S18C Epsin1                           | 5 | Unpaired non-parametric Mann-Whitney U test    | $7.9 \times 10^{-3}$ (adjusted p value)  |
| S18C Epsin2                           | 5 | Unpaired non-parametric Mann-Whitney U test    | $7.9 \times 10^{-3}$ (adjusted p value)  |
| S18E Aorta before vs siCtrl NP        | 5 | Kruskal-Wallis Dunn's multiple comparison test | $1.1 \times 10^{-2}$ (adjusted p value)  |
| S18E Aorta before vs siEpsin1/2 NP    | 5 | Kruskal-Wallis Dunn's multiple comparison test | $9.9 \times 10^{-1}$ (adjusted p value)  |
| S18E Aorta siCtrl NP vs siEpsin1/2 NP | 5 | Kruskal-Wallis Dunn's multiple comparison test | $4.8 \times 10^{-2}$ (adjusted p value)  |
| S18E Aorta Root before vs siCtrl NP   | 5 | Kruskal-Wallis Dunn's multiple comparison test | $7.1 \times 10^{-3}$ (adjusted p value)  |

|                                             |   |                                                |                                          |
|---------------------------------------------|---|------------------------------------------------|------------------------------------------|
| S18E Aorta Root before vs siEpsin1/2 NP     | 5 | Kruskal-Wallis Dunn's multiple comparison test | 9.9 x10 <sup>-1</sup> (adjusted p value) |
| S18E Aorta Root siCtrl NP vs siEpsin1/2 NP  | 5 | Kruskal-Wallis Dunn's multiple comparison test | 7.1 x10 <sup>-2</sup> (adjusted p value) |
| S19 BCA collagen before vs siCtrl NP        | 6 | One way ANOVA Tukey's multiple comparison test | 5.8 x10 <sup>-9</sup> (adjusted p value) |
| S19 BCA collagen before vs siEpsin1/2 NP    | 6 | One way ANOVA Tukey's multiple comparison test | 9.1 x10 <sup>-2</sup> (adjusted p value) |
| S19 BCA collagen siCtrl NP vs siEpsin1/2 NP | 6 | One way ANOVA Tukey's multiple comparison test | 6.0 x10 <sup>-9</sup> (adjusted p value) |
| S19 Root collagen before vs siCtrl NP       | 6 | One way ANOVA Tukey's multiple comparison test | 7.3 x10 <sup>-9</sup> (adjusted p value) |
| S19 BCA collagen before vs siEpsin1/2 NP    | 6 | One way ANOVA Tukey's multiple comparison test | 3.7 x10 <sup>-5</sup> (adjusted p value) |
| S19 BCA collagen siCtrl NP vs siEpsin1/2 NP | 6 | One way ANOVA Tukey's multiple comparison test | 5.0 x10 <sup>-6</sup> (adjusted p value) |
| S19 BCA Elastic before vs siCtrl NP         | 6 | One way ANOVA Tukey's multiple comparison test | 5.8 x10 <sup>-9</sup> (adjusted p value) |
| S19 BCA Elastic before vs siEpsin1/2 NP     | 6 | One way ANOVA Tukey's multiple comparison test | 2.3 x10 <sup>-7</sup> (adjusted p value) |
| S19 BCA Elastic siCtrl NP vs siEpsin1/2 NP  | 6 | One way ANOVA Tukey's multiple comparison test | 5.8 x10 <sup>-9</sup> (adjusted p value) |
| S19 Root Elastic before vs siCtrl NP        | 6 | One way ANOVA Tukey's multiple comparison test | 4.4 x10 <sup>-8</sup> (adjusted p value) |
| S19 Root Elastic before vs siEpsin1/2 NP    | 6 | One way ANOVA Tukey's multiple comparison test | 1.9 x10 <sup>-5</sup> (adjusted p value) |
| S19 Root Elastic siCtrl NP vs siEpsin1/2 NP | 6 | One way ANOVA Tukey's multiple comparison test | 5.8 x10 <sup>-9</sup> (adjusted p value) |
| S20 TG before vs siCtrl NP                  | 5 | Kruskal-Wallis Dunn's multiple comparison test | 7.7 x10 <sup>-1</sup> (adjusted p value) |
| S20 TG before vs siEpsin1/2 NP              | 5 | Kruskal-Wallis Dunn's multiple comparison test | 9.7 x10 <sup>-1</sup> (adjusted p value) |
| S20 TG siCtrl NP vs siEpsin1/2 NP           | 5 | Kruskal-Wallis Dunn's multiple comparison test | 9.9 x10 <sup>-1</sup> (adjusted p value) |
| S20 Cholesterol before vs siCtrl NP         | 5 | Kruskal-Wallis Dunn's multiple comparison test | 9.9 x10 <sup>-1</sup> (adjusted p value) |
| S20 Cholesterol before vs siEpsin1/2 NP     | 5 | Kruskal-Wallis Dunn's multiple comparison test | 9.9 x10 <sup>-1</sup> (adjusted p value) |
| S20 Cholesterol siCtrl NP vs siEpsin1/2 NP  | 5 | Kruskal-Wallis Dunn's multiple comparison test | 9.9 x10 <sup>-1</sup> (adjusted p value) |
| S20 HDL before vs siCtrl NP                 | 5 | Kruskal-Wallis Dunn's multiple comparison test | 9.9 x10 <sup>-1</sup> (adjusted p value) |
| S20 HDL before vs siEpsin1/2 NP             | 5 | Kruskal-Wallis Dunn's multiple comparison test | 9.9 x10 <sup>-1</sup> (adjusted p value) |
| S20 HDL siCtrl NP vs siEpsin1/2 NP          | 5 | Kruskal-Wallis Dunn's multiple comparison test | 9.9 x10 <sup>-1</sup> (adjusted p value) |
| S20 non-HDL before vs siCtrl NP             | 5 | Kruskal-Wallis Dunn's multiple comparison test | 9.9 x10 <sup>-1</sup> (adjusted p value) |
| S20 non-HDL before vs siEpsin1/2 NP         | 5 | Kruskal-Wallis Dunn's multiple comparison test | 9.9 x10 <sup>-1</sup> (adjusted p value) |

|                                              |   |                                                |                                         |
|----------------------------------------------|---|------------------------------------------------|-----------------------------------------|
| S20 non-HDL siCtrl NP vs siEpsin1/2 NP       | 5 | Kruskal-Wallis Dunn's multiple comparison test | $9.9 \times 10^{-1}$ (adjusted p value) |
| S21A BCA before vs siCtrl NP                 | 6 | One way ANOVA Tukey's multiple comparison test | $3.7 \times 10^{-2}$ (adjusted p value) |
| S21A BCA before vs siEpsin1/2 NP             | 6 | One way ANOVA Tukey's multiple comparison test | $4.0 \times 10^{-6}$ (adjusted p value) |
| S21A BCA siCtrl NP vs siEpsin1/2 NP          | 6 | One way ANOVA Tukey's multiple comparison test | $4.9 \times 10^{-4}$ (adjusted p value) |
| S21B collagen before vs siCtrl NP            | 6 | One way ANOVA Tukey's multiple comparison test | $7.2 \times 10^{-1}$ (adjusted p value) |
| S21B collagen before vs siEpsin1/2 NP        | 6 | One way ANOVA Tukey's multiple comparison test | $5.8 \times 10^{-9}$ (adjusted p value) |
| S21B collagen siCtrl NP vs siEpsin1/2 NP     | 6 | One way ANOVA Tukey's multiple comparison test | $5.8 \times 10^{-9}$ (adjusted p value) |
| S21B Elastic before vs siCtrl NP             | 6 | One way ANOVA Tukey's multiple comparison test | $1.2 \times 10^{-2}$ (adjusted p value) |
| S21B Elastic before vs siEpsin1/2 NP         | 6 | One way ANOVA Tukey's multiple comparison test | $7.8 \times 10^{-9}$ (adjusted p value) |
| S21B Elastic siCtrl NP vs siEpsin1/2 NP      | 6 | One way ANOVA Tukey's multiple comparison test | $9.8 \times 10^{-8}$ (adjusted p value) |
| S21C CCR-7 WT vs DKO                         | 3 | Unpaired non-parametric Mann-Whitney U test    | $1.0 \times 10^{-1}$ (adjusted p value) |
| S21C Netrin-1 WT vs DKO                      | 3 | Unpaired non-parametric Mann-Whitney U test    | $1.0 \times 10^{-1}$ (adjusted p value) |
| S21C Sema-3a WT vs DKO                       | 3 | Unpaired non-parametric Mann-Whitney U test    | $1.0 \times 10^{-1}$ (adjusted p value) |
| S22D Female Aorta before vs siCtrl NP        | 5 | Kruskal-Wallis Dunn's multiple comparison test | $1.4 \times 10^{-2}$ (adjusted p value) |
| S22D Female Aorta before vs siEpsin1/2 NP    | 5 | Kruskal-Wallis Dunn's multiple comparison test | $9.9 \times 10^{-1}$ (adjusted p value) |
| S22D Female Aorta siCtrl NP vs siEpsin1/2 NP | 5 | Kruskal-Wallis Dunn's multiple comparison test | $4.0 \times 10^{-2}$ (adjusted p value) |
| S22E Female Aorta before vs siCtrl NP        | 6 | One way ANOVA Tukey's multiple comparison test | $1.0 \times 10^{-6}$ (adjusted p value) |
| S22E Female Aorta before vs siEpsin1/2 NP    | 6 | One way ANOVA Tukey's multiple comparison test | $9.8 \times 10^{-1}$ (adjusted p value) |
| S22E Female Aorta siCtrl NP vs siEpsin1/2 NP | 6 | One way ANOVA Tukey's multiple comparison test | $1.0 \times 10^{-6}$ (adjusted p value) |
| S22F Female Aorta before vs siCtrl NP        | 6 | One way ANOVA Tukey's multiple comparison test | $8.2 \times 10^{-1}$ (adjusted p value) |
| S22F Female Aorta before vs siEpsin1/2 NP    | 6 | One way ANOVA Tukey's multiple comparison test | $1.9 \times 10^{-5}$ (adjusted p value) |
| S22F Female Aorta siCtrl NP vs siEpsin1/2 NP | 6 | One way ANOVA Tukey's multiple comparison test | $5.4 \times 10^{-5}$ (adjusted p value) |
| S23A siCtrl vs siEpsin1                      | 4 | Unpaired non-parametric Mann-Whitney U test    | $2.9 \times 10^{-2}$ (adjusted p value) |
| S23A siCtrl vs siEpsin2                      | 4 | Unpaired non-parametric Mann-Whitney U test    | $2.9 \times 10^{-2}$ (adjusted p value) |

|                                  |   |                                             |                                          |
|----------------------------------|---|---------------------------------------------|------------------------------------------|
| S23B siCtrl vs siEpsin1/2        | 8 | Unpaired t test                             | 2.8x10 <sup>-16</sup> (adjusted p value) |
| S23C siCtrl vs siEpsin1/2        | 8 | Unpaired t test                             | 5.9x10 <sup>-16</sup> (adjusted p value) |
| S23D +HDL siCtrl vs siEpsin1/2   | 9 | Unpaired t test                             | 1.0 x10 <sup>-6</sup> (adjusted p value) |
| S23D +ApoA1 siCtrl vs siEpsin1/2 | 9 | Unpaired t test                             | 8.1 x10 <sup>-1</sup> (adjusted p value) |
| S24E siCtrl vs siEpsin1/2 -oxLDL | 5 | Unpaired non-parametric Mann-Whitney U test | 6.9x10 <sup>-1</sup> (adjusted p value)  |
| S24E siCtrl vs siEpsin1/2 +oxLDL | 5 | Unpaired non-parametric Mann-Whitney U test | 7.9 x10 <sup>-3</sup> (adjusted p value) |
| S24E -oxLDL VS +oxLDL siCtrl     | 5 | Unpaired non-parametric Mann-Whitney U test | 7.9 x10 <sup>-3</sup> (adjusted p value) |
| S24E -oxLDL VS +oxLDL siEpsin1/2 | 5 | Unpaired non-parametric Mann-Whitney U test | 6.7 x10 <sup>-1</sup> (adjusted p value) |
| S24F siCtrl vs siEpsin1/2 -oxLDL | 5 | Unpaired non-parametric Mann-Whitney U test | 8.4x10 <sup>-1</sup> (adjusted p value)  |
| S24F siCtrl vs siEpsin1/2 +oxLDL | 5 | Unpaired non-parametric Mann-Whitney U test | 7.9 x10 <sup>-3</sup> (adjusted p value) |
| S24F -oxLDL VS +oxLDL siCtrl     | 5 | Unpaired non-parametric Mann-Whitney U test | 7.9 x10 <sup>-3</sup> (adjusted p value) |
| S24F -oxLDL VS +oxLDL siEpsin1/2 | 5 | Unpaired non-parametric Mann-Whitney U test | 2.0x10 <sup>-1</sup> (adjusted p value)  |
| S24G siCtrl vs siEpsin1/2 -oxLDL | 5 | Unpaired non-parametric Mann-Whitney U test | 8.4 x10 <sup>-1</sup> (adjusted p value) |
| S24G siCtrl vs siEpsin1/2 +oxLDL | 5 | Unpaired non-parametric Mann-Whitney U test | 7.9 x10 <sup>-3</sup> (adjusted p value) |
| S24G -oxLDL VS +oxLDL siCtrl     | 5 | Unpaired non-parametric Mann-Whitney U test | 7.9 x10 <sup>-3</sup> (adjusted p value) |
| S24G -oxLDL VS +oxLDL siEpsin1/2 | 5 | Unpaired non-parametric Mann-Whitney U test | 4.2 x10 <sup>-1</sup> (adjusted p value) |
