# Supplementary material
Source: PubMed Central journal article supplement (PMC9822875)
Supplement: NIHMS1850825-supplement-321723_Major_Resources_Table.pdf [file NIHMS1850825-supplement-321723_Major_Resources_Table.pdf]

## Major Resources Table

In order to allow validation and replication of experiments, all essential research materials listed in the Methods should be included in the Major Resources Table below. Authors are encouraged to use public repositories for protocols, data, code, and other materials and provide persistent identifiers and/or links to repositories when available. Authors may add or delete rows as needed.

### Animals (in vivo studies)

| Species | Vendor or Source            | Background Strain                  | Sex | Persistent ID / URL                                                               |
|---------|-----------------------------|------------------------------------|-----|-----------------------------------------------------------------------------------|
| Mouse   | Jackson Research Laboratory | ApoE <sup>-/-</sup>                | M/F | <a href="https://www.jax.org/strain/002052">https://www.jax.org/strain/002052</a> |
| Mouse   | Jackson Research Laboratory | C57BL/6                            | M/F | <a href="https://www.jax.org/strain/000664">https://www.jax.org/strain/000664</a> |
| Mouse   | Jackson Research Laboratory | LysM-Cre deleter                   | M/F | <a href="https://www.jax.org/strain/004781">https://www.jax.org/strain/004781</a> |
| Mouse   | Jackson Research Laboratory | C57BL/6-Abcg1 <sup>tm1Ched/J</sup> | M/F | <a href="https://www.jax.org/strain/027954">https://www.jax.org/strain/027954</a> |

### Genetically Modified Animals

|                        | Species | Vendor or Source | Background Strain                                         | Other Information | Persistent ID / URL |
|------------------------|---------|------------------|-----------------------------------------------------------|-------------------|---------------------|
| <b>Parent - Male</b>   | Mouse   | Homemade         | Epsin1 <sup>fl/fl</sup> , Epsin2 <sup>-/-</sup> , C57BL/6 | N/A               | N/A                 |
| <b>Parent - Female</b> | Mouse   | Homemade         | Epsin1 <sup>fl/fl</sup> , Epsin2 <sup>-/-</sup> , C57BL/6 | N/A               | N/A                 |

### Antibodies

| Target antigen                       | Vendor or Source         | Catalog #      | Working concentration     |
|--------------------------------------|--------------------------|----------------|---------------------------|
| <b>Primary Antibodies</b>            |                          |                |                           |
| Rabbit polyclonal anti-Epsin1        | Home made                | N/A            | 1:1000(WB)<br>1:200(IF)   |
| Rabbit polyclonal anti-Epsin2        | Abcam                    | ab74942        | 1:1000(WB)                |
| Rabbit polyclonal anti-Epsin2        | Home made                | N/A            | 1:1000(WB)<br>1:200(IF)   |
| Rat monoclonal Anti-mouse /SR-B3CD36 | R & D System             | MAB2519,       | 1:1000(WB)                |
| Rabbit monoclonal anti-CD36          | Invitrogen               | VL3153825      | 1:1000(WB)<br>1:100(Flow) |
| Mouse monoclonal anti-GAPDH          | Santa Cruz Biotechnology | F118, sc166545 | 1:1000(WB)                |
| Mouse monoclonal anti-ubiquitin      | Cytoskeleton, Inc        | AUB01          | 1:1000(WB)                |

DOI [to be added]

|                                                                                     |                          |                 |                               |
|-------------------------------------------------------------------------------------|--------------------------|-----------------|-------------------------------|
| Rabbit polyclonal anti-ABCA1                                                        | Novus Biologicals        | NB400-105SS     | 1:1000(WB)                    |
| Rabbit polyclonal anti-ABCG1                                                        | Novus Biologicals        | NB400-132B      | 1:1000(WB)<br>1:100(IF, Flow) |
| Rabbit monoclonal anti-ABCG1                                                        | Invitrogen               | VK3126422       | 1:1000(WB)                    |
| Goat polyclonal anti mouse LDLR                                                     | R & D System             | AF2255          | 1:1000(WB)                    |
| Rat monoclonal Anti-mouse SRA1                                                      | R & D System             | MAB1797         | 1:1000(WB)                    |
| Monoclonal anti-Flag                                                                | Sigma-Aldrich            | F3165           | 1:1000(WB)                    |
| Rat monoclonal anti-F4/80                                                           | Santa Cruz Biotechnology | sc59171         | 1:100(Flow)                   |
| F4/80 monoclonal antibody, APC                                                      | ThermoFisher Scientific  | MF48005         | 1:100(Flow)                   |
| Anti-mouse F4/80-Alexa Fluro 488                                                    | Invitrogen/eBioscience   | 2126068         | 1:100(Flow)                   |
| Goat polyclonal anti-EEA1                                                           | Santa Cruz Biotechnology | B1813, sc6415   | 1:100(IF)                     |
| Mouse monoclonal anti-Rab11                                                         | Santa Cruz Biotechnology | H0919, sc166912 | 1:100(IF)                     |
| Mouse monoclonal anti-Lamp1                                                         | Santa Cruz Biotechnology | F1609, sc18821  | 1:100(IF)                     |
| Rabbit polyclonal anti-CD68                                                         | Santa Cruz Biotechnology | sc9139          | 1:100(IF)                     |
| Anti-Actin, $\alpha$ -Smooth Muscle - Cy3™ antibody, Mouse monoclonal $\alpha$ -SMA | Sigma-Aldrich            | C6198           | 1:100(IF)                     |
| Rat-anti Mouse CD31                                                                 | BD Pharmingen            | 550274          | 1:50(IF)                      |
| Mouse monoclonal anti-LRP1                                                          | Santa Cruz               | sc5731          | 1:1000(WB)                    |
| Goat monoclonal P-selectin                                                          | Santa Cruz Biotechnology | G1411, sc6943   | 1:70(IF)                      |
| Mouse monoclonal E-selectin                                                         | Santa Cruz Biotechnology | sc137054        | 1:70(IF)                      |
| Goat polyclonal ICAM-1                                                              | Santa Cruz Biotechnology | sc1511          | 1:70(IF)                      |
| Mouse monoclonal VCAM-1                                                             | Santa Cruz Biotechnology | sc13160         | 1:70(IF)                      |
| <b>Alexa Fluor Conjugated Second Antibodies</b>                                     |                          |                 |                               |
| Goat anti-rabbit 647                                                                | Invitrogen               | A-21244         | 1:150(IF, Flow)               |
| Goat anti-rat 647                                                                   | Invitrogen               | A-21247         | 1:150(IF, Flow)               |
| Donkey anti-mouse 594                                                               | Invitrogen               | A-21203         | 1:150(IF, Flow)               |
| Donkey anti-rabbit 594                                                              | Invitrogen               | A-21207         | 1:150(IF, Flow)               |
| Donkey anti-rat 594                                                                 | Invitrogen               | A-21209         | 1:150(IF, Flow)               |
| Donkey anti-rat 488                                                                 | Invitrogen               | A-21208         | 1:150(IF, Flow)               |
| Donkey anti-mouse 488                                                               | Invitrogen               | A-21202         | 1:150(IF, Flow)               |
| Donkey anti-rabbit 488                                                              | Invitrogen               | A-21206         | 1:150(IF, Flow)               |

**DNA/cDNA Clones**

| Clone Name                 | Source / Repository                            | Catalog #  |
|----------------------------|------------------------------------------------|------------|
| pcDNA                      | <a href="#">Kai Song et al, 2021</a>           | N/A        |
| Flag-Epsin1 <sup>WT</sup>  | <a href="#">Yunzhou Dong et al, 2020</a>       | N/A        |
| Flag-Epsin1 $\Delta$ UIM   | <a href="#">Yunzhou Dong et al, 2020</a>       | N/A        |
| Flag-Epsin1 $\Delta$ ENTH  | <a href="#">Yunzhou Dong et al, 2021</a>       | N/A        |
| CD36-bio-His: CMV plasmid  | Addgene                                        | Cat# 52025 |
| ABCG1-pCSdest: SP6 plasmid | Addgene                                        | Cat# 53952 |
| rAAV8-D377Y-mPCSK9         | Boston Children's Hospital Viral Core Facility | N/A        |

**Cultured Cells**

| Name     | Vendor or Source | Sex (F, M, or unknown) | Persistent ID / URL |
|----------|------------------|------------------------|---------------------|
| HEK-293T | ATCC (CRL-3216)  | unknown                |                     |
| THP1     | ATCC (TIB-202)   | unknown                |                     |

**Reagents, Peptides, and Recombinant Proteins**

| Description                                                                    | Source / Repository            | Catalog #           |
|--------------------------------------------------------------------------------|--------------------------------|---------------------|
| Oil Red O (ORO)                                                                | AMRESCO                        | Cat# 0684-100G      |
| Hematoxylin and Eosin stain kit                                                | Vector Laboratories            | Cat# H-3502         |
| Oxidized LDL (ox-LDL)                                                          | Athens Research and Technology | Cat#12-16-120412-ox |
| Acetylated LDL (Ac-LDL)                                                        | Invitrogen                     | Cat#2300941         |
| Low Density Lipoprotein from Human Plasma, oxidized, Dil conjugate (Dil-OxLDL) | ThermoFisher Scientific        | Cat# L34358         |
| TopFluor Cholesterol                                                           | Avanti Polar Lipids, Inc       | Cat# 810255p        |
| MG132                                                                          | Sigma-Aldrich                  | Cat# M7449          |
| N-Ethylmaleimide (NEM)                                                         | Alfa Aesar                     | Cat# 40526          |
| Brewer Thioglycollate Medium                                                   | Sigma-Aldrich                  | Cat#124k0115        |

DOI [to be added]

|                                              |                         |                   |
|----------------------------------------------|-------------------------|-------------------|
| Bodipy 493/503                               | Invitrogen              | Cat# D3922        |
| SlowFade mount with DAPI                     | Invitrogen              | Cat# 1896320      |
| M-CSF mouse                                  | Prospec                 | Cat# cyt-439-b    |
| Protein inhibitor cocktail                   | TargetMol               | Cat# C0001        |
| Phalloidin-iFluor 594 reagent                | Abcam                   | Cat# ab176751     |
| Liver x receptor agonist (LXR T0901317)      | Apexbio Tech LLC        | Cat#A2249         |
| Mouse seroblock FCR                          | Bio-Rad                 | Cat# BuF041B      |
| Phosphotungstic acid hydrate                 | ACROS                   | Cat#A0417659      |
| [1,2- <sup>3</sup> H]-Cholesterol            | PerkinElmer             | Cat#NET139001MC   |
| Liquid scintillation fluid OPTI-Flour        | PerkinElmer             | Cat# 47-20081     |
| Apoprotein A-I (ApoA1)                       | Sigma-Aldrich           | Cat# A0722        |
| High density lipoprotein (HDL)               | Sigma-Aldrich           | Cat# L8039        |
| Hexane                                       | ThermoFisher Scientific | Cat# 610070040    |
| Isopropanol, molecular biology grade         | ThermoFisher Scientific | Cat# T036181000CS |
| Cholesterol acyltransferase (ACAT) inhibitor | Sigma-Aldrich           | Cat# S9318-5mg    |
| Lipofectamine 2000 transfection reagent      | Invitrogen              | Cat#11668027      |
| Lipofectamine LTX                            | Invitrogen              | Cat# A12621       |
| ImageiT™ signal enhancer                     | Invitrogen              | Cat# 136933       |

|                                                                                           |                            |                  |
|-------------------------------------------------------------------------------------------|----------------------------|------------------|
| Qiagen RNeasy Mini Kit                                                                    | Qiagen                     | Cat# 74106       |
| RNase-free DNase 1                                                                        | New England Biolabs        | Cat# M0303S      |
| SuperScript III First-Strand Synthesis<br>SuperMix                                        | ThermoFisher Scientific    | Cat# 18080400    |
| SYPR Green PCR Master Mix reagent                                                         | GeneCopoeia                | Cat# QP001-01    |
| Aqueous Mounting Medium                                                                   | R & D Systems              | Cat# CTS011      |
| Protein A/G plus agarose                                                                  | Santa Cruz Biotechnology   | Cat# Sc-2003     |
| EZ-Link Sulfo-NHS-LC-Biotin                                                               | ThermoFisher Scientific    | Cat# 21335       |
| Neutravidin Beads                                                                         | ThermoFisher Scientific    | Cat# 29200       |
| S2P-peptide (CRTLTVRKC)                                                                   | GLS Biochem Systems Inc    | Cat# 625358      |
| DSPE-PEG-Mal (MW, 3.4 kDa)                                                                | Nanocs Inc.                | Cat# PG2-DSML-3k |
| Cationic ethylenediamine core-<br>poly(amidoamine) (PAMAM) dendrimer<br>generation 0 (G0) | Sigma-Aldrich              | Cat# 412368      |
| Ester-terminated PLGA                                                                     | DURECT Corporation         | Cat# B6013-2     |
| Amata™ Mouse macrophage nucleofector<br>kit                                               | Lonza                      | Cat# VPA-1009    |
| Collagenase type I                                                                        | Gibco by Life technologies | Cat# 1866783     |
| Collagenase type IV                                                                       | Gibco by Life technologies | Cat# 2383671     |
| Liberase                                                                                  | Roche                      | Cat# 05401127001 |

|                                                    |                      |             |
|----------------------------------------------------|----------------------|-------------|
| Chromium Next GEM Single Cell 3' Reagent Kits v3.1 | 10X Genomics         |             |
| GEM Single Cell 3'GEM Kit v3.1                     | 10X Genomics         | PN-1000123  |
| GEM Single Cell 3'Library Kit v3.1                 | 10X Genomics         | PN-1000157  |
| GEM Single Cell 3'Gel Bead Kit v3.1                | 10X Genomics         | PN-1000122  |
| Dynabeads™ MyOne™ SILANE                           | 10X Genomics         | PN-2000048  |
| GEM Chip G Single Cell Kit, 48rxns                 | 10X Genomics         | PN-1000120  |
| Single Index Kit T Set A, 96 rxns                  | 10X Genomics         | PN-1000213  |
| SPRIselect Reagent                                 | Beckman Coulter Inc. | Cat# B23317 |
| phorbol 12-myristate 13-acetate (PMA)              | Sigma                | Cat#p8313   |

### Oligonucleotides

| Description                                                                       | Source / Repository | Catalog # |
|-----------------------------------------------------------------------------------|---------------------|-----------|
| <b>Epsin1:</b>                                                                    | This study          | N/A       |
| Forward: 5'-CTACCAACGTCCATTGCGGT-3'<br>Reverse: 5'-GCAGCGATGAGGTTCGACATT-3'       |                     |           |
| <b>Epsin2:</b>                                                                    | This study          | N/A       |
| Forward: 5'-<br>TCTATCAGACGGCAGATGAAAAAC-3'<br>Reverse: 5'-GTCATTGGAGGTGGCCTCC-3' |                     |           |
| <b>IL-6</b>                                                                       | This study          | N/A       |
| Forward: 5'-AGTCCGGAGAGGAGACTTCA-3'<br>Reverse: 5'-TTCCACGATTTCCCAGAG-3'          |                     |           |
| <b>IL-1beta</b>                                                                   | This study          | N/A       |

|                                                                                       |            |     |
|---------------------------------------------------------------------------------------|------------|-----|
| Forward: 5'-GAAGAAGAGCCCATCCTCTG-3'<br>Reverse: 5'-TCATCTCGGAGCCTGTAGTG-3'            |            |     |
| <b>TNF-alpha</b>                                                                      | This study | N/A |
| Forward: 5'-ATGAGAAGTTCCCAAATGGC-3'<br>Reverse: 5'-CTCCACTTGGTGGTTTGCTA-3'            |            |     |
| <b>MCP-1</b>                                                                          | This study | N/A |
| Forward: 5'-GAAGGAATGGGTCCAGACAT-3'<br>Reverse: 5'-ACGGGTCAACTTCACATTCA-3'            |            |     |
| <b>iNOS</b>                                                                           | This study | N/A |
| Forward: 5'-CCCTTCCGAAGTTTCTGGCAGC-3'<br>Reverse: 5'-<br>GGCTGTCAGAGCCTCGTGGCTTTGG-3' |            |     |
| <b>IL-10</b>                                                                          | This study | N/A |
| Forward: 5'-CCCAGAAATCAAGGAGCATT-3'<br>Reverse: 5'-TCACTCTTCACCTGCTCCAC-3'            |            |     |
| <b>Arg1</b>                                                                           | This study | N/A |
| Forward: 5'-CAGTGGCTTTAACCTTGGCT-3'<br>Reverse: 5'-GTCAGTCCCTGGCTTATGGT-3'            |            |     |
| <b>ABCG1</b>                                                                          | This study | N/A |
| Forward: 5'-CCGATGTCCCCTTTCAGATCA-3'<br>Reverse: 5'-AGCAGCGAACAGCACAAAAC-3'           |            |     |
| <b>ABCA1</b>                                                                          | This study | N/A |
| Forward: 5'-GTGGGCTCCTCCCTGTTTTT-3'<br>Reverse: 5'-TCTGAGAAACACTGTCCTCCTTTT-3'        |            |     |
| <b>CD36</b>                                                                           | This study | N/A |
| Forward: 5'-GCTGTCAGGCGTCAGGATAA-3'<br>Reverse: 5'-CACATTTCAGAAGGCAGCAACT-3'          |            |     |

|                                                                               |            |             |
|-------------------------------------------------------------------------------|------------|-------------|
| <b>CCR7</b>                                                                   | This study | N/A         |
| Forward: 5'- CATGGACCCAGGTGTGCTT-3'<br>Reverse: 5'- CATGAGAGGCAGGAACCAGG-3'   |            |             |
| <b>Netrin-1</b>                                                               | This study | N/A         |
| Forward: 5- GGAGGAACCGGAAGACTGTG-3'<br>Reverse: 5- GTCCTCGGCATTACCCAACA-3'    |            |             |
| <b>Sema 3a</b>                                                                | This study | N/A         |
| Forward: 5'- ACGCACCATGGCACCG-3'<br>Reverse: 5'- GTGCTAGGCCAGTATATCTCTCTG-3'  |            |             |
| <b>Beta-actin</b>                                                             | This study | N/A         |
| Forward: 5'- TTACTGCTCTGGCTCCTAGCA-3'<br>Reverse: 5'-CCACCGATCCACACAGAGTAC-3' |            |             |
| <b>Mouse Epsin1 siRNA sequence</b>                                            | This study | N/A         |
| GAACUGGAGGCACGUCUACAAUU                                                       |            |             |
| <b>Mouse Epsin2 siRNA sequence</b>                                            | This study | N/A         |
| GCAGUGCCGUGAGAACAUCUUUU                                                       |            |             |
| <b>Human Epsin1 siRNA sequence</b>                                            | This study | Cat#134054  |
| GAGGAGAGCAAGAGGGAGAUU                                                         |            |             |
| <b>Human Epsin2 siRNA sequence</b>                                            | This study | Cat#S230617 |
| GGGAAGUGGUUGUGCAUAUUU                                                         |            |             |
| <b>Mouse control luciferase siRNA sequence</b>                                | This study | N/A         |
| CUUACGCUGAGUACUUCGA dT dT                                                     |            |             |
| <b>Mouse clathrin (Picalm) siRNA sequence</b>                                 | This study | Cat#134054  |
| GGAGAUAUUCCAGAUCUUUt                                                          |            |             |

## Software and Algorithms

DOI [to be added]



| Description    | Persistent ID / URL                                                                                                                                                         |
|----------------|-----------------------------------------------------------------------------------------------------------------------------------------------------------------------------|
| Image J        | NIH website: <a href="https://imagej.nih.gov/ij/">https://imagej.nih.gov/ij/</a>                                                                                            |
| GraphPad Prism | GraphPad software company: <a href="https://www.graphpad.com/scientific-software/prism/">https://www.graphpad.com/scientific-software/prism/</a>                            |
| Zeiss Zen lite | <a href="https://www.zeiss.com/microscopy/us/products/microscope-software/zen-lite.html">https://www.zeiss.com/microscopy/us/products/microscope-software/zen-lite.html</a> |
| Image J        | NIH website: <a href="https://imagej.nih.gov/ij/">https://imagej.nih.gov/ij/</a>                                                                                            |
| GraphPad Prism | GraphPad software company: <a href="https://www.graphpad.com/scientific-software/prism/">https://www.graphpad.com/scientific-software/prism/</a>                            |

### Randomization and Blinding

Experimental groups were allocated randomly, and investigators were blinded when performing all data collection.
