# Supplementary material
Source: PubMed Central journal article supplement (PMC9822875)
Supplement: NIHMS1850825-supplement-321723_Uncut_Gel_Blots.pdf [file NIHMS1850825-supplement-321723_Uncut_Gel_Blots.pdf]

# Uncropped gel blot

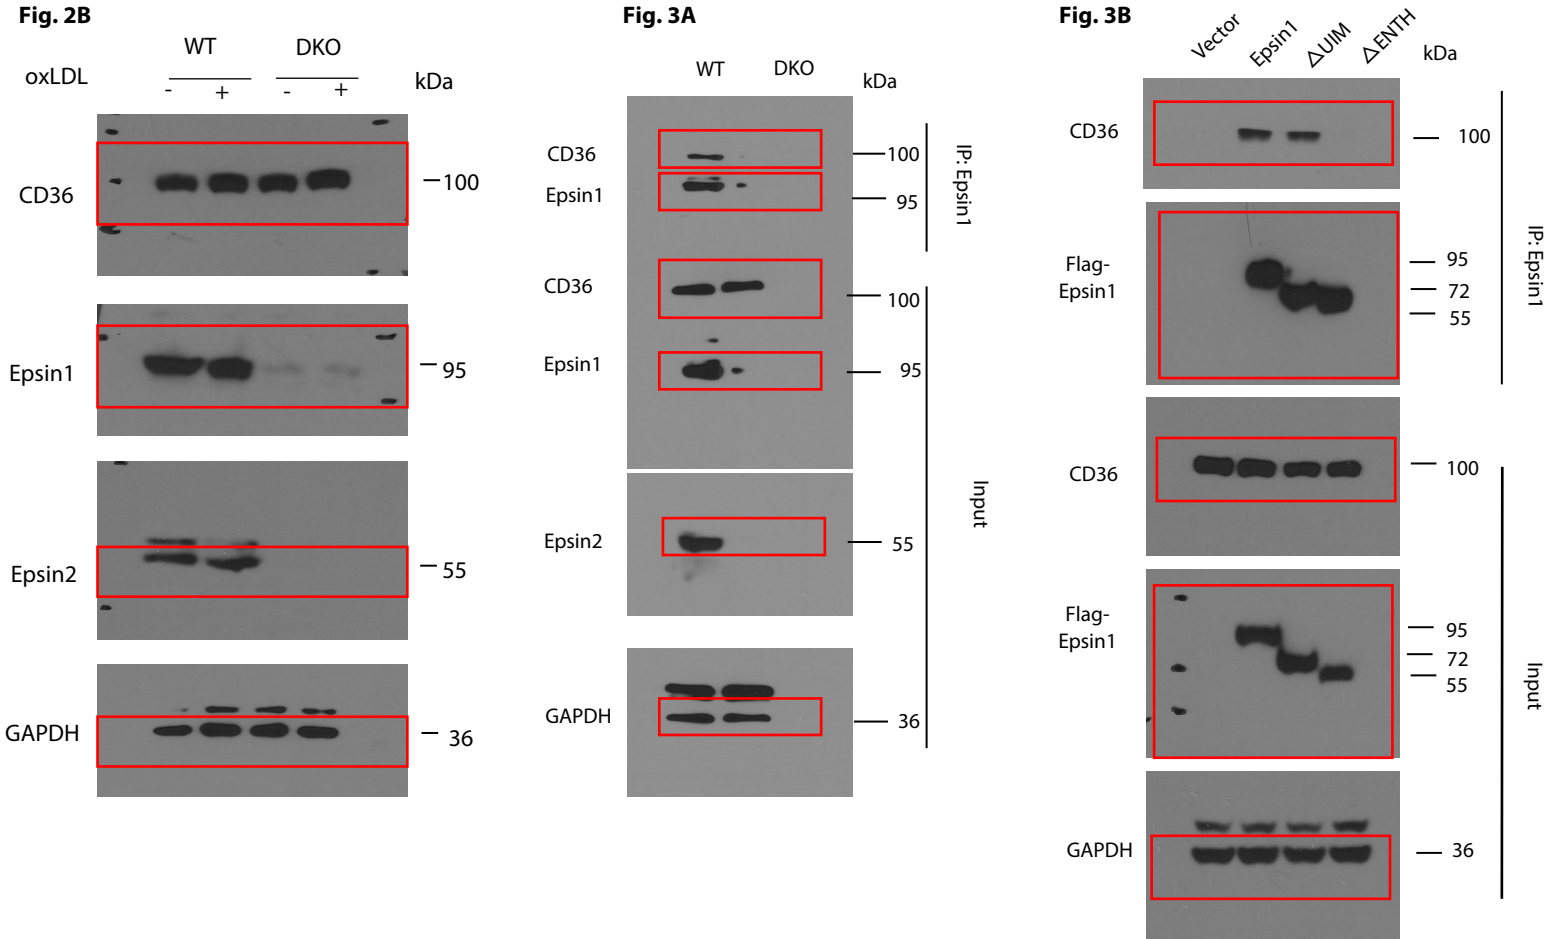

Figure 2B, 3A and 3B

**Fig. 3C**

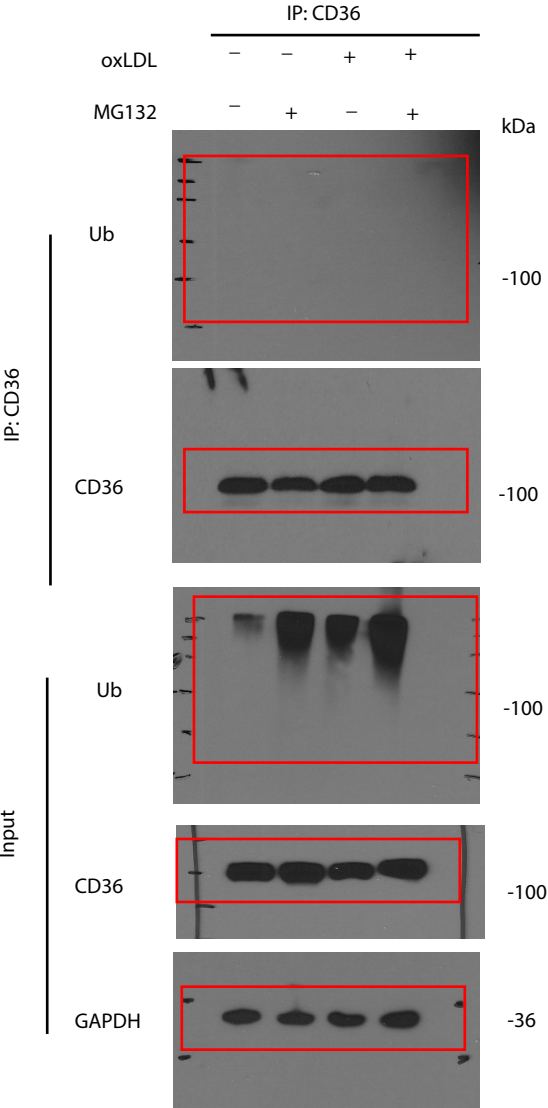

**Fig. 5F**

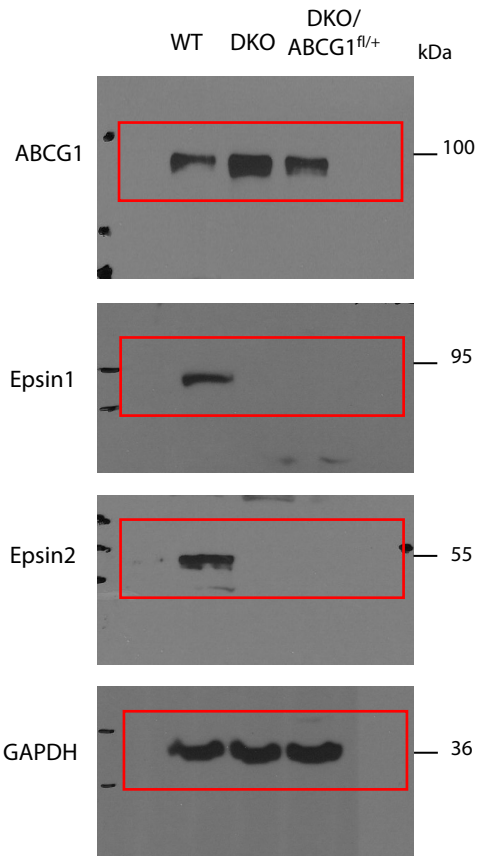

Figure 3C and 5F

**Fig. 6A**

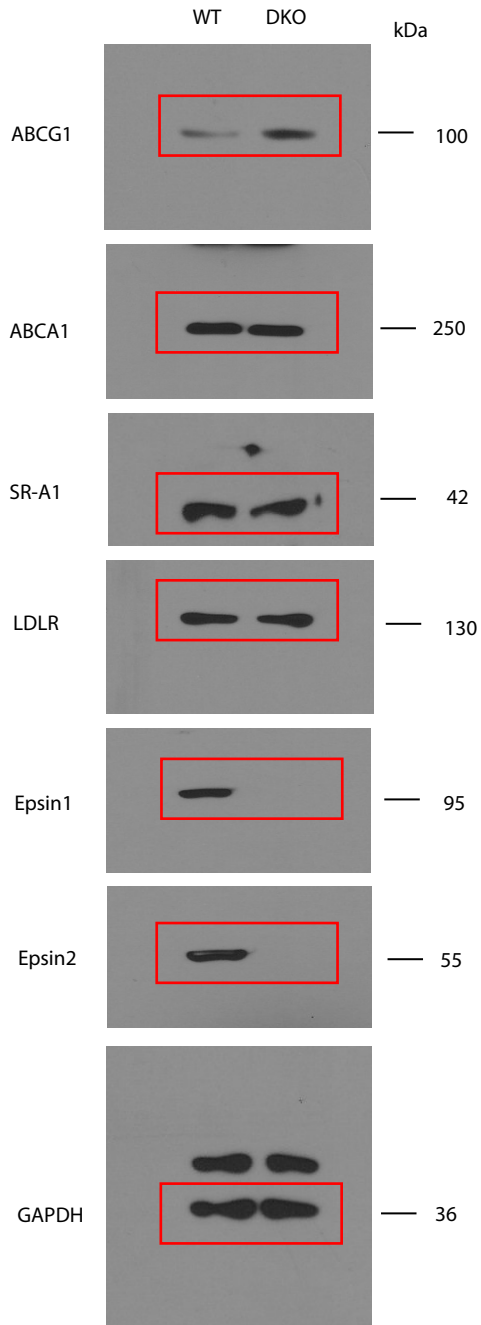

**Fig. 6B**

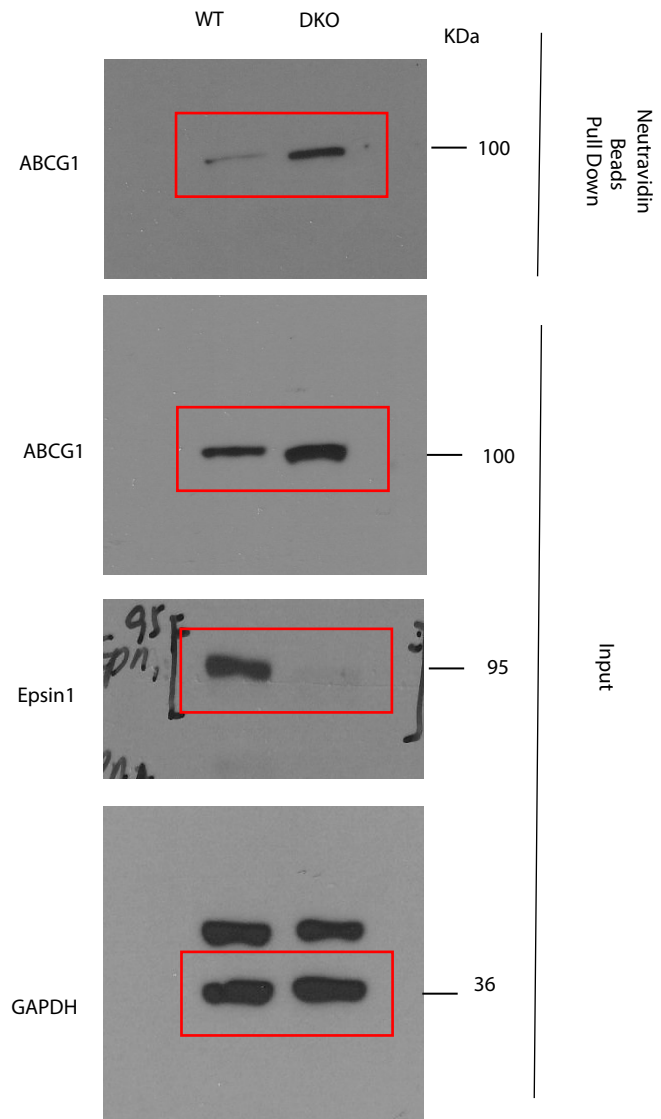

Figure 6A and 6B

**Fig. 6D**

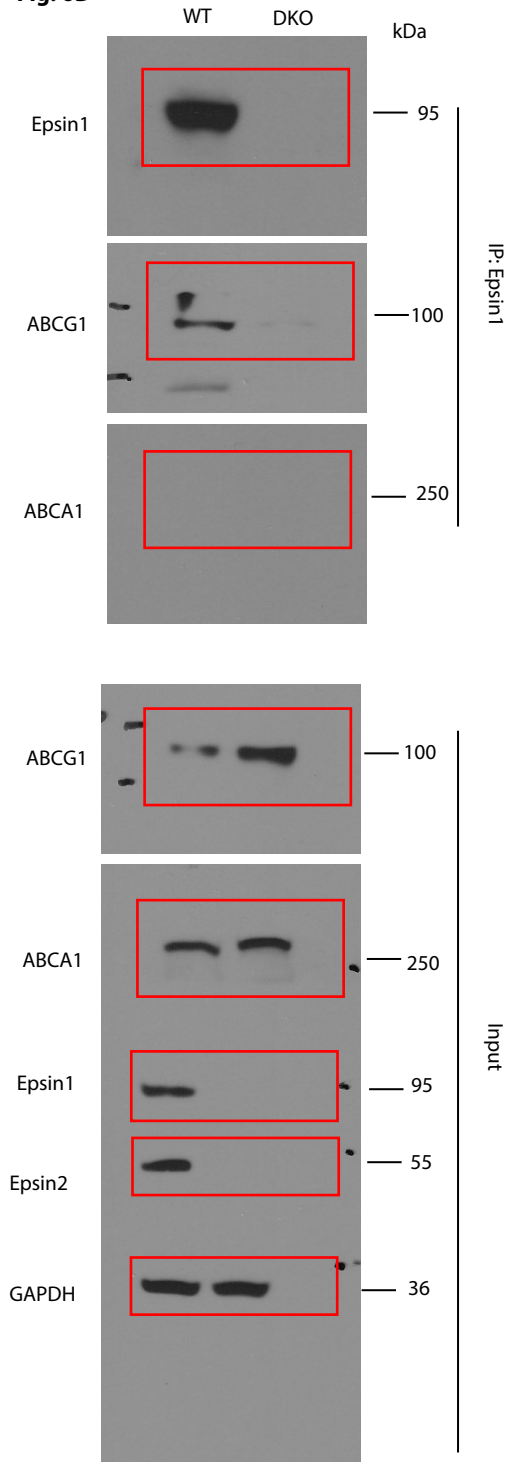

**Fig. 6E**

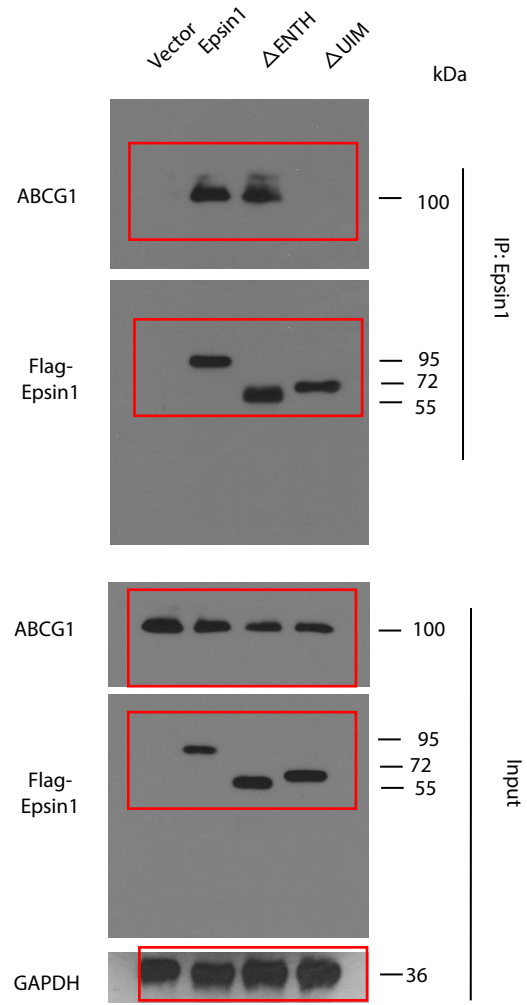

Figure 6D and 6E

**Fig. 6F**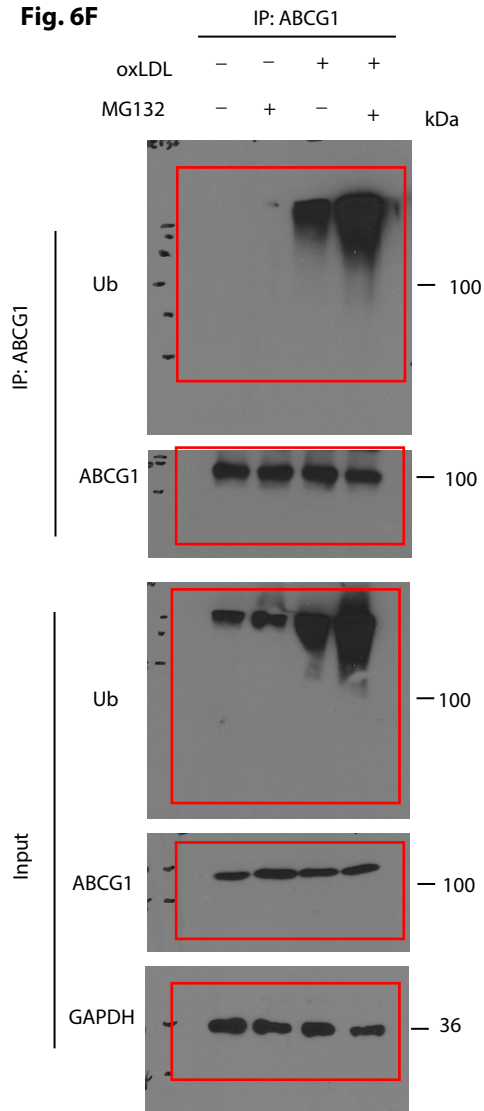**Fig. S16C**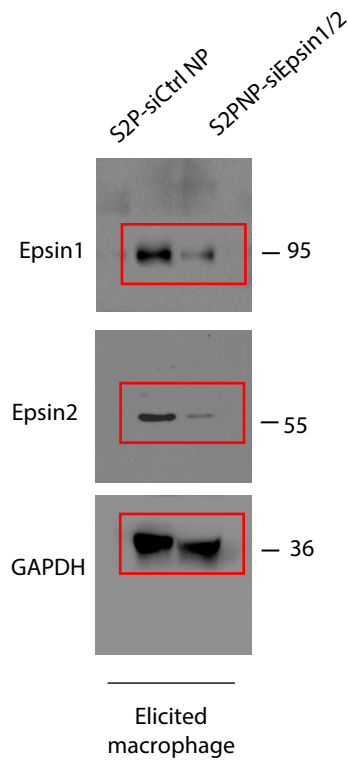**Fig. S18B**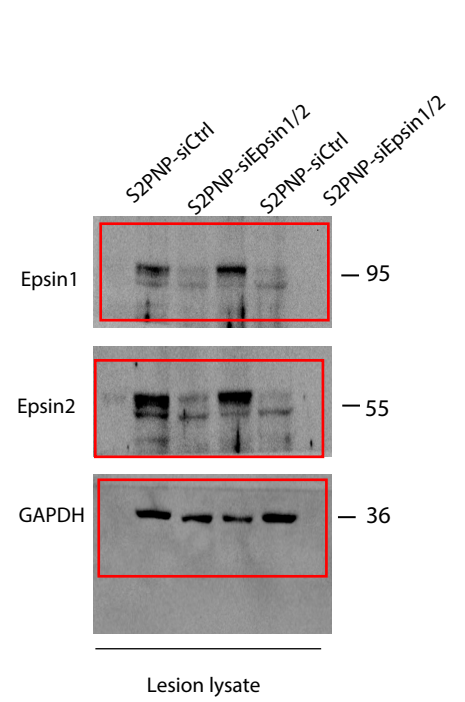

Figure 6F, S16C and S18B

Figure S23A

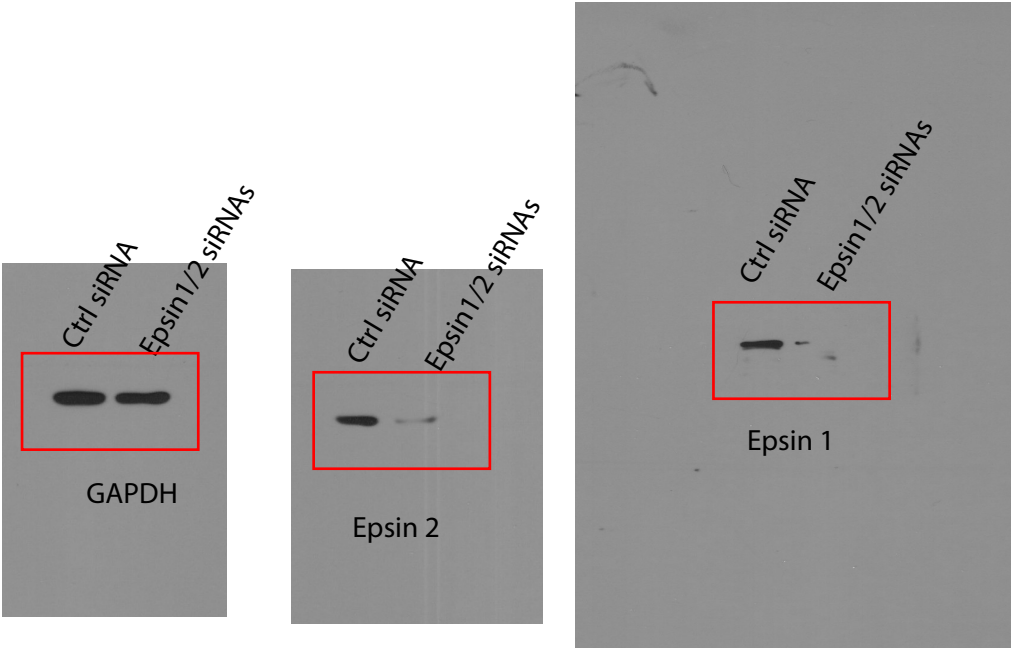

Figure S23A
